# Supplementary material for: Phen-2NO, a new C2-symmetric rigid-featured tetradentate ligand, and its application in the asymmetric alkylation reaction of indoles
Source: Royal Society of Chemistry journal article supplement (doi:10.1039/d4nj00088a), 2024-01-01

# Phen-2NO, a new $C_2$ -symmetric rigid-featured tetradentate ligand and its application in asymmetric alkylation reaction of indoles

Zi-Yue Chen<sup>a,c</sup>, Ke-Lan Xu<sup>a,c</sup>, Xi-Rui Wang<sup>a,c</sup>, Pan Hu<sup>a,c</sup>, Wei-Yan Jiang<sup>b,\*</sup>, Yi-Feng Dai,<sup>a</sup> Li-Jun Peng<sup>a</sup> and Xiong-Li Liu<sup>a,\*</sup>

<sup>a</sup> National & Local Joint Engineering Research Center for the Exploitation of Homology Resources of Southwest Medicine and Food, Guizhou University, Guiyang 550025, Guizhou, China.

<sup>b</sup> Guizhou Equipment Manufacturing Polytechnic, Guiyang 550025, Guizhou, China.

<sup>c</sup> These four authors contributed equally to this work.

\*E-mail address: xlliu1@gzu.edu.cn and 1517510346@qq.com

## Table of Contents

|                                                                                                                                  |     |
|----------------------------------------------------------------------------------------------------------------------------------|-----|
| Table of contents.....                                                                                                           | S1  |
| 1. General experimental information.....                                                                                         | S2  |
| 2. General procedure for preparation of chiral Phen-2NO ligands <b>L1</b> .....                                                  | S2  |
| 3. Characterization data of compound <b>3i</b> and ligands <b>L</b> .....                                                        | S2  |
| 4. General procedure for preparation of chiral ligand <b>L2a</b> .....                                                           | S8  |
| 5. Characterization data of chiral ligand <b>L2a</b> .....                                                                       | S8  |
| 6. The gram scale synthesis of the Phen-2NO ligand <b>L1a</b> .....                                                              | S9  |
| 7. Catalytic asymmetric synthesis of compounds <b>6</b> .....                                                                    | S9  |
| 8. Characterization data of compounds <b>6</b> .....                                                                             | S10 |
| 9. Control experiments and HPLC spectra for compound <b>6a</b> .....                                                             | S17 |
| 10. References.....                                                                                                              | S19 |
| 11. X-ray crystal data for compounds <b>3i</b> .....                                                                             | S20 |
| 12. The copies of <sup>1</sup> H NMR, <sup>13</sup> C NMR and HPLC spectra for compounds <b>3i</b> , <b>L</b> and <b>6</b> ..... | S21 |

## 1. General information

Reactions were monitored by thin layer chromatography using UV light to visualize the course of reaction. Purification of reaction products was carried out by flash chromatography.  $^1\text{H}$  and  $^{13}\text{C}$ NMR spectra were obtained using a Bruker DPX-400 spectrometer.  $^1\text{H}$  NMR chemical shifts are reported in ppm ( $\delta$ ) relative to tetramethylsilane (TMS) with the solvent resonance employed as the internal standard. Data are reported as follows: chemical shift, multiplicity (s = singlet, d = doublet, t = triplet, m = multiplet), coupling constants (Hz) and integration.  $^{13}\text{C}$  NMR chemical shifts are reported in ppm ( $\delta$ ) from tetramethylsilane (TMS) with the solvent resonance as the internal standard. Melting points were measured on an electrothermal digital melting point apparatus.

## 2. General procedure for preparation of chiral Phen-2NO ligands L1

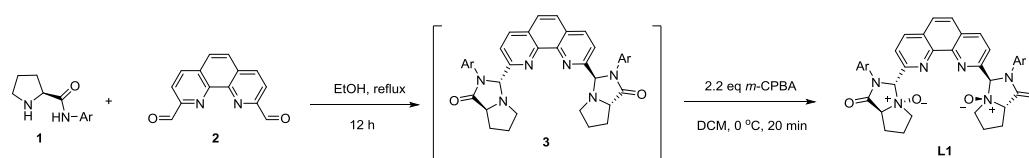

**General procedure A**—In a sealed tube equipped with a magnetic stirring bar, phenanthroline-dicarbaldehyde **2** (1.0 mmol) and optically pure prolinamide **1** (2.4 mmol, 2.4 equiv) were added. Then, ethanol (6.0 mL) was added and the reaction was heated with stirring at reflux for 12 h. After completion of the reaction, as indicated by TLC, the aftertreatment residue was purified by flash column chromatography to give the intermediate **3**.

For the oxidation step, see: X. Liu, L. Lin and X. Feng, Chiral *N,N'*-dioxide ligands: synthesis, coordination chemistry and asymmetric catalysis, *Org. Chem. Front.*, 2014, **1**, 298-302. In a sealed tube equipped with a magnetic stirring bar, to the intermediate **3** was added 3.0 mL of DCM and *m*-CPBA (2.2 eq). The reaction mixture was stirred at 0 °C for 20 min. After completion of the reaction, as indicated by TLC, the aftertreatment residue was purified by flash column chromatography to furnish the Phen-2NO ligand L1.

## 3. Characterization data of compounds **3** and ligands L

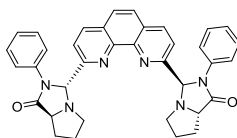

**3a:** Light yellow solid, yield 73%, >20:1 dr;  $^1\text{H}$  NMR ( $\text{CDCl}_3$ , 400 MHz)  $\delta$ : 1.84-1.89 (m, 4H), 2.18-2.23 (m, 4H), 3.04-3.10 (m, 2H), 3.47-3.52 (m, 2H), 4.23-4.26 (m, 2H), 6.15 (s, 2H), 6.95-6.99 (m, 2H), 7.14-7.18 (m, 4H), 7.47 (d,  $J = 8.0$  Hz, 2H), 7.58-7.61 (m, 6H), 8.09 (d,  $J = 8.4$  Hz, 2H);  $^{13}\text{C}$  NMR ( $\text{CDCl}_3$ , 100 MHz)  $\delta$ : 23.7, 26.9, 55.3, 63.8, 83.6, 118.3, 120.0, 123.9, 125.3, 127.3, 127.8, 136.2, 136.4, 144.5, 157.5, 173.9; HRMS (ESI-TOF)  $m/z$ : Calcd. for  $\text{C}_{36}\text{H}_{32}\text{N}_6\text{NaO}_2$   $[\text{M}+\text{Na}]^+$ : 603.2479; Found: 603.2467.

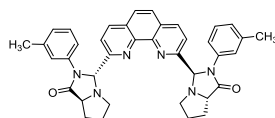

**3i:** Light yellow solid, yield 74%, >20:1 dr;  $^1\text{H}$  NMR ( $\text{CDCl}_3$ , 400 MHz)  $\delta$ : 1.84-1.90 (m, 4H), 2.17-2.22 (m, 10H), 3.04-3.11 (m, 2H), 3.48-3.54 (m, 2H), 4.20-4.23 (m, 2H), 6.16 (s, 2H), 6.79 (d,  $J = 7.2$  Hz, 2H), 7.01-7.05 (m, 2H), 7.25-7.28 (m, 2H), 7.46 (d,  $J = 8.4$  Hz, 2H), 7.52 (s, 2H), 7.62 (s, 2H), 8.10 (d,  $J = 8.4$  Hz, 2H);  $^{13}\text{C}$  NMR ( $\text{CDCl}_3$ , 100 MHz)  $\delta$ : 19.5, 22.9, 26.1, 54.5, 63.0, 82.8, 116.4, 117.5, 119.9, 124.1, 124.5, 126.5, 126.8, 135.4, 135.6, 136.9, 143.8, 156.8, 173.1; HRMS (ESI-TOF)  $m/z$ : Calcd. for  $\text{C}_{38}\text{H}_{36}\text{N}_6\text{NaO}_2$   $[\text{M}+\text{Na}]^+$ : 631.2792; Found: 631.2787.

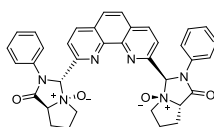

**L1a** (Prepared according to general procedure A): Light yellow solid, M.p. 256.3-256.9  $^\circ\text{C}$ , overall yield 42%, >20:1 dr;  $^1\text{H}$  NMR ( $\text{CD}_3\text{OD}$ , 400 MHz)  $\delta$ : 2.24-2.26 (m, 2H), 2.50-2.58 (m, 2H), 2.64-2.82 (m, 4H), 3.97-4.01 (m, 2H), 4.19-4.27 (m, 2H), 5.43 (d,  $J = 7.6$  Hz, 2H), 6.92 (s, 2H), 7.09-7.13 (m, 2H), 7.22-7.26 (m, 4H), 7.44-7.46 (m, 4H), 7.80-7.83 (m, 2H), 7.97 (d,  $J = 8.0$  Hz, 2H), 8.38-8.40 (m, 2H);  $^{13}\text{C}$  NMR ( $\text{CD}_3\text{OD}$ , 100 MHz)  $\delta$ : 22.0, 24.8, 71.0, 77.4, 87.4, 122.6, 126.0, 126.4, 127.3, 128.9, 129.7, 135.7, 137.2, 145.8, 151.7, 169.5; HRMS (ESI-TOF)  $m/z$ : Calcd. for  $\text{C}_{36}\text{H}_{32}\text{N}_6\text{NaO}_4$   $[\text{M}+\text{Na}]^+$ : 635.2371; Found: 635.2363.

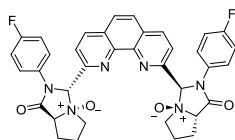

**L1b** (Prepared according to general procedure A): Light yellow solid, M.p. 243.5-244.4 °C, overall yield 38%, 20:1 dr;  $^1\text{H NMR}$  ( $\text{CD}_3\text{OD}$ , 400 MHz)  $\delta$ : 2.25-2.27 (m, 2H), 2.54-2.56 (m, 2H), 2.62-2.67 (m, 2H), 2.76-2.78 (m, 2H), 4.02 (s, 2H), 4.27 (d,  $J = 9.6$  Hz, 2H), 5.44 (s, 2H), 6.90-6.93 (m, 2H), 6.97-7.03 (m, 4H), 7.46-7.51 (m, 4H), 7.81-7.87 (m, 2H), 7.95-7.99 (m, 2H), 8.41-8.45 (m, 2H);  $^{13}\text{C NMR}$  ( $\text{CD}_3\text{OD}$ , 100 MHz)  $\delta$ : 22.1, 24.7, 71.1, 77.2, 87.7, 115.6 (d,  $J_{\text{CF}} = 23.0$  Hz), 125.5 (d,  $J_{\text{CF}} = 9.3$  Hz), 126.1, 127.3, 129.8, 131.6 (d,  $J_{\text{CF}} = 3.3$  Hz), 137.3, 145.9, 151.6, 161.5 (d,  $J_{\text{CF}} = 244.1$  Hz), 169.6; HRMS (ESI-TOF)  $m/z$ : Calcd. for  $\text{C}_{36}\text{H}_{30}\text{F}_2\text{N}_6\text{NaO}_4$   $[\text{M}+\text{Na}]^+$ : 671.2189; Found: 671.2177.

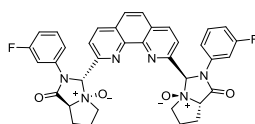

**L1c** (Prepared according to general procedure A): Light yellow solid, M.p. 231.1-232.2 °C, overall yield 35%, 15:1 dr;  $^1\text{H NMR}$  ( $\text{CD}_3\text{OD}$ , 400 MHz)  $\delta$ : 2.25-2.27 (m, 2H), 2.51-2.61 (m, 2H), 2.66-2.75 (m, 2H), 2.76-2.85 (m, 2H), 3.95-4.00 (m, 2H), 4.17-4.25 (m, 2H), 5.39 (d,  $J = 6.4$  Hz, 2H), 6.83-6.88 (m, 2H), 6.99 (s, 2H), 7.17-7.26 (m, 4H), 7.49-7.53 (m, 2H), 7.87 (s, 2H), 8.04 (d,  $J = 8.0$  Hz, 2H), 8.46 (d,  $J = 8.0$  Hz, 2H);  $^{13}\text{C NMR}$  ( $\text{CD}_3\text{OD}$ , 100 MHz)  $\delta$ : 22.0, 24.9, 71.1, 77.3, 86.8, 108.9 (d,  $J_{\text{CF}} = 26.3$  Hz), 112.7 (d,  $J_{\text{CF}} = 21.4$  Hz), 117.0, 126.0, 127.3, 129.8, 130.4 (d,  $J_{\text{CF}} = 10.1$  Hz), 137.3 (d,  $J_{\text{CF}} = 8.4$  Hz), 145.8, 151.4, 162.6 (d,  $J_{\text{CF}} = 243.4$  Hz), 169.4; HRMS (ESI-TOF)  $m/z$ : Calcd. for  $\text{C}_{36}\text{H}_{30}\text{F}_2\text{N}_6\text{NaO}_4$   $[\text{M}+\text{Na}]^+$ : 671.2189; Found: 671.2186.

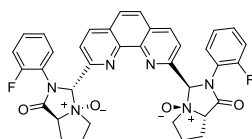

**L1d** (Prepared according to general procedure A): Light yellow solid, M.p. 263.1-264.0 °C, overall yield 32%, 13:1 dr;  $^1\text{H NMR}$  ( $\text{CD}_3\text{OD}$ , 400 MHz)  $\delta$ : 2.25-2.31 (m, 2H), 2.50-2.62 (m, 4H), 2.67-2.73 (m, 2H), 4.03-4.07 (m, 2H), 4.32-4.39 (m, 2H), 5.43-5.45 (m, 2H), 6.73 (s, 2H), 6.91-6.95 (m, 2H), 7.00-7.10 (m, 2H), 7.19-7.29 (m, 4H), 7.89-7.94 (m, 4H), 8.43-8.46 (m, 2H);  $^{13}\text{C NMR}$  ( $\text{CD}_3\text{OD}$ , 100 MHz)  $\delta$ : 22.1, 24.7, 71.3, 76.7, 87.6, 116.1 (d,  $J_{\text{CF}} = 20.3$  Hz), 121.9 (d,

$J_{CF} = 12.1$  Hz), 124.8 (d,  $J_{CF} = 4.4$  Hz), 126.1, 127.4, 129.5, 129.9, 130.2 (d,  $J_{CF} = 8.5$  Hz), 137.2, 146.0, 151.5, 158.4 (d,  $J_{CF} = 248.2$  Hz), 170.1; HRMS (ESI-TOF)  $m/z$ : Calcd. for  $C_{36}H_{30}F_2N_6NaO_4 [M+Na]^+$ : 671.2184; Found: 671.2170.

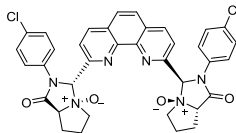

**L1e** (Prepared according to general procedure A): Light yellow solid, M.p. 255.7-256.5 °C, overall yield 36%, 13:1 dr;  $^1H$  NMR ( $CD_3OD$ , 400 MHz)  $\delta$ : 2.25-2.27 (m, 2H), 2.55-2.58 (m, 2H), 2.68-2.71 (m, 2H), 2.77-2.83 (m, 2H), 4.00-4.02 (m, 2H), 4.22-4.27 (m, 2H), 5.43 (s, 2H), 6.95-6.99 (m, 2H), 7.23-7.28 (m, 4H), 7.47-7.54 (m, 4H), 7.76-7.85 (m, 2H), 7.99-8.03 (m, 2H), 8.39-8.44 (m, 2H);  $^{13}C$  NMR ( $CD_3OD$ , 100 MHz)  $\delta$ : 22.1, 24.8, 71.1, 77.3, 87.2, 124.1, 126.1, 127.3, 129.0, 129.8, 131.7, 134.4, 137.4, 145.8, 151.5, 169.5; HRMS (ESI-TOF)  $m/z$ : Calcd. for  $C_{36}H_{30}Cl_2N_6NaO_4 [M+Na]^+$ : 703.1578; Found: 703.1566.

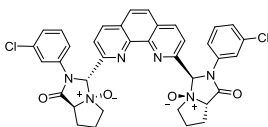

**L1f** (Prepared according to general procedure A): Light yellow solid, M.p. 257.1-258.3 °C, overall yield 32%, 12:1 dr;  $^1H$  NMR ( $CD_3OD$ , 400 MHz)  $\delta$ : 2.25-2.27 (m, 2H), 2.51-2.59 (m, 2H), 2.67-2.74 (m, 2H), 2.76-2.82 (m, 2H), 3.95-3.99 (m, 2H), 4.17-4.25 (m, 2H), 5.38 (d,  $J = 6.8$  Hz, 2H), 6.99 (s, 2H), 7.11-7.13 (m, 2H), 7.17-7.21 (m, 2H), 7.31-7.33 (m, 2H), 7.68 (d,  $J = 2.0$  Hz, 2H), 7.85 (s, 2H), 8.04 (d,  $J = 8.4$  Hz, 2H), 8.45 (d,  $J = 8.4$  Hz, 2H);  $^{13}C$  NMR ( $CD_3OD$ , 100 MHz)  $\delta$ : 22.0, 24.9, 71.1, 77.3, 86.8, 120.0, 121.6, 126.0, 126.1, 127.4, 129.8, 130.2, 134.3, 137.1, 137.4, 145.8, 151.4, 169.5; HRMS (ESI-TOF)  $m/z$ : Calcd. for  $C_{36}H_{30}Cl_2N_6NaO_4 [M+Na]^+$ : 703.1589; Found: 703.1577.

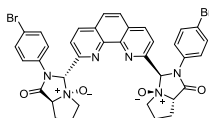

**L1g** (Prepared according to general procedure A): Light yellow solid, M.p. 257.7-258.9 °C, overall yield 35%, 15:1 dr;  $^1H$  NMR ( $CD_3OD$ , 400 MHz)  $\delta$ : 2.25-2.27 (m, 2H), 2.53-2.57 (m, 2H), 2.66-2.68 (m, 2H), 2.74-2.79 (m, 2H), 3.97-4.01 (m, 2H), 4.20-4.27 (m, 2H), 5.38 (d,  $J = 8.4$  Hz,

2H), 6.95 (s, 2H), 7.37-7.44 (m, 8H), 7.87-7.89 (m, 2H), 8.00 (d,  $J = 8.4$  Hz, 2H), 8.44-8.47 (m, 2H);  $^{13}\text{C}$  NMR ( $\text{CD}_3\text{OD}$ , 100 MHz)  $\delta$ : 22.0, 24.8, 71.1, 77.2, 87.1, 119.4, 124.2, 126.1, 127.4, 129.8, 131.9, 134.8, 137.4, 145.8, 151.4, 169.4; HRMS (ESI-TOF)  $m/z$ : Calcd. for  $\text{C}_{36}\text{H}_{30}\text{Br}_2\text{N}_6\text{NaO}_4$   $[\text{M}+\text{Na}]^+$ : 791.0569; Found: 791.0550.

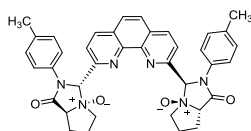

**L1h** (Prepared according to general procedure A): Light yellow solid, M.p. 264.9-265.5 °C, overall yield 32%, 12:1 dr;  $^1\text{H}$  NMR ( $\text{CD}_3\text{OD}$ , 400 MHz)  $\delta$ : 2.17 (s, 3H), 2.23-2.24 (m, 2H), 2.52-2.57 (m, 2H), 2.66-2.70 (m, 2H), 2.74-2.79 (m, 2H), 3.97-4.01 (m, 2H), 4.19-4.27 (m, 2H), 5.44 (d,  $J = 11.6$  Hz, 2H), 6.88 (s, 2H), 7.05 (d,  $J = 8.4$  Hz, 4H), 7.28-7.34 (m, 4H), 7.71 (s, 2H), 7.94 (d,  $J = 8.0$  Hz, 2H), 8.31 (d,  $J = 8.0$  Hz, 2H);  $^{13}\text{C}$  NMR ( $\text{CD}_3\text{OD}$ , 100 MHz)  $\delta$ : 23.5, 25.9, 28.7, 75.0, 81.3, 91.6, 126.7, 129.9, 131.2, 133.3, 133.6, 137.0, 140.6, 141.1, 149.8, 155.7, 173.4; HRMS (ESI-TOF)  $m/z$ : Calcd. for  $\text{C}_{38}\text{H}_{36}\text{N}_6\text{NaO}_4$   $[\text{M}+\text{Na}]^+$ : 663.2682; Found: 663.2675.

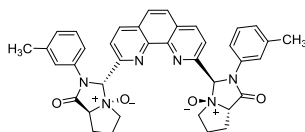

**L1i** (Prepared according to general procedure A): Light yellow solid, M.p. 262.1-263.3 °C, overall yield 31%, 11:1 dr;  $^1\text{H}$  NMR ( $\text{CD}_3\text{OD}$ , 400 MHz)  $\delta$ : 2.22-2.26 (m, 8H), 2.50-2.57 (m, 2H), 2.65-2.80 (m, 4H), 3.96-4.00 (m, 2H), 4.18-4.25 (m, 2H), 5.44 (s, 2H), 6.90-6.94 (m, 4H), 7.07-7.12 (m, 2H), 7.18-7.22 (m, 2H), 7.31-7.33 (m, 2H), 7.71-7.78 (m, 2H), 7.98 (d,  $J = 8.0$  Hz, 2H), 8.32-8.38 (m, 2H);  $^{13}\text{C}$  NMR ( $\text{CD}_3\text{OD}$ , 100 MHz)  $\delta$ : 20.0, 22.0, 24.8, 71.0, 77.4, 87.4, 119.5, 122.6, 125.9, 127.1, 127.2, 128.7, 129.7, 135.7, 137.2, 139.1, 145.8, 151.8, 169.4; HRMS (ESI-TOF)  $m/z$ : Calcd. for  $\text{C}_{38}\text{H}_{36}\text{N}_6\text{NaO}_4$   $[\text{M}+\text{Na}]^+$ : 663.2682; Found: 663.2679.

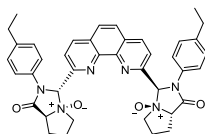

**L1j** (Prepared according to general procedure A): Light yellow solid, M.p. 238.4-239.5 °C, overall yield 38%, 18:1 dr;  $^1\text{H}$  NMR ( $\text{CD}_3\text{OD}$ , 400 MHz)  $\delta$ : 1.03-1.06 (m, 6H), 2.23-2.25 (m, 2H),

2.44-2.50 (m, 4H), 2.53-2.59 (m, 2H), 2.64-2.81 (m, 4H), 3.98-4.02 (m, 2H), 4.20-4.27 (m, 2H), 6.90 (s, 2H), 7.08 (d,  $J = 8.4$  Hz, 4H), 7.37 (d,  $J = 8.4$  Hz, 4H), 7.63 (s, 2H), 7.95 (d,  $J = 8.0$  Hz, 2H), 8.26 (d,  $J = 8.0$  Hz, 2H);  $^{13}\text{C}$  NMR ( $\text{CD}_3\text{OD}$ , 100 MHz)  $\delta$ : 14.7, 22.0, 24.7, 27.9, 71.1, 77.4, 87.6, 122.8, 126.0, 127.2, 128.3, 129.6, 133.3, 137.1, 143.0, 145.8, 151.7, 169.4; HRMS (ESI-TOF)  $m/z$ : Calcd. for  $\text{C}_{40}\text{H}_{40}\text{N}_6\text{NaO}_4$   $[\text{M}+\text{Na}]^+$ : 691.2989; Found: 691.2975.

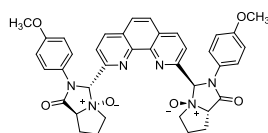

**L1k** (Prepared according to general procedure A): Light yellow solid, M.p. 258.9-259.4 °C, overall yield 35%, 13:1 dr;  $^1\text{H}$  NMR ( $\text{CD}_3\text{OD}$ , 400 MHz)  $\delta$ : 2.23-2.28 (m, 2H), 2.50-2.57 (m, 2H), 2.62-2.65 (m, 2H), 2.70-2.75 (m, 2H), 3.64 (s, 6H), 3.97-4.01 (m, 2H), 4.23-4.30 (m, 2H), 5.41-5.44 (m, 2H), 6.76-6.81 (m, 6H), 7.28-7.32 (m, 4H), 7.81-7.87 (m, 2H), 7.91 (d,  $J = 8.0$  Hz, 2H), 8.37-8.43 (m, 2H);  $^{13}\text{C}$  NMR ( $\text{CD}_3\text{OD}$ , 100 MHz)  $\delta$ : 22.0, 24.6, 54.5, 71.0, 77.3, 88.1, 114.1, 125.3, 126.0, 127.3, 128.0, 129.7, 137.1, 145.9, 151.8, 158.6, 169.6; HRMS (ESI-TOF)  $m/z$ : Calcd. for  $\text{C}_{38}\text{H}_{36}\text{N}_6\text{NaO}_6$   $[\text{M}+\text{Na}]^+$ : 695.2589; Found: 695.2589.

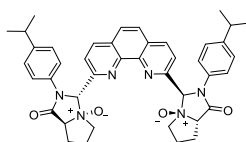

**L1l** (Prepared according to general procedure A): Light yellow solid, M.p. 248.8-249.7 °C, overall yield 33%, 12:1 dr;  $^1\text{H}$  NMR ( $\text{CD}_3\text{OD}$ , 400 MHz)  $\delta$ : 1.08-1.10 (m, 12H), 2.24-2.26 (m, 2H), 2.52-2.55 (m, 2H), 2.67-2.79 (m, 6H), 3.99 (s, 2H), 4.20-4.27 (m, 2H), 5.42 (s, 2H), 6.88 (d,  $J = 4.0$  Hz, 2H), 7.11 (d,  $J = 6.8$  Hz, 4H), 7.35-7.37 (m, 4H), 7.71-7.81 (m, 2H), 7.95 (d,  $J = 8.0$  Hz, 2H), 8.32-8.39 (m, 2H);  $^{13}\text{C}$  NMR ( $\text{CD}_3\text{OD}$ , 100 MHz)  $\delta$ : 22.0, 22.8, 24.7, 33.5, 71.0, 77.3, 87.6, 122.8, 126.0, 126.8, 127.2, 129.7, 133.3, 137.2, 145.8, 147.6, 151.8, 169.4; HRMS (ESI-TOF)  $m/z$ : Calcd. for  $\text{C}_{42}\text{H}_{44}\text{N}_6\text{NaO}_4$   $[\text{M}+\text{Na}]^+$ : 719.3304; Found: 719.3290.

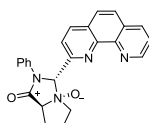

**L6a** (Prepared according to general procedure A): White solid, overall yield 35%, 10:1 dr;  $^1\text{H}$

NMR (DMSO-*d*<sub>6</sub>, 400 MHz)  $\delta$ : 2.13-2.18 (m, 1H), 2.27-2.34 (m, 1H), 2.38-2.51 (m, 2H), 3.75-3.79 (m, 1H), 4.11-4.18 (m, 1H), 4.73-7.76 (m, 1H), 7.07 (s, 1H), 7.11-7.14 (m, 1H), 7.28-7.32 (m, 2H), 7.60 (d, *J* = 8.0 Hz, 2H), 7.75-7.78 (m, 1H), 7.94-8.05 (m, 3H), 8.45-8.50 (m, 2H), 9.14-9.16 (m, 1H); <sup>13</sup>C NMR (DMSO-*d*<sub>6</sub>, 100 MHz)  $\delta$ : 23.0, 24.8, 71.7, 77.8, 88.0, 123.2, 123.9, 126.0, 126.6, 126.7, 127.9, 129.1, 129.3, 129.4, 136.6, 136.7, 136.8, 145.2, 145.7, 150.8, 152.9, 169.8; HRMS (ESI-TOF) *m/z*: Calcd. for C<sub>24</sub>H<sub>20</sub>N<sub>4</sub>NaO<sub>2</sub> [M+Na]<sup>+</sup>: 419.1478; Found: 419.1470.

#### 4. General procedure for preparation of chiral ligand L2a

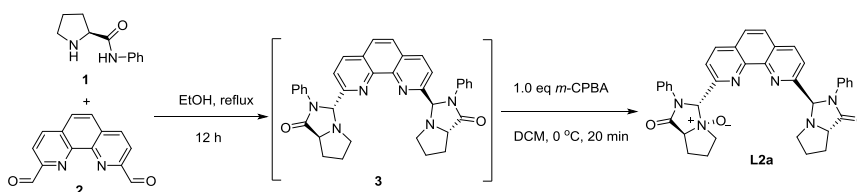

In a sealed tube equipped with a magnetic stirring bar, phenanthroline-dicarbaldehyde **2** (1.0 mmol) and optically pure prolinamide **1** (2.4 mmol, 2.4 equiv) were added. Then, ethanol (6.0 mL) was added and the reaction was heated with stirring at reflux for 12 h. After completion of the reaction, as indicated by TLC, the aftertreatment residue was purified by flash column chromatography to give the intermediate **3**.

In a sealed tube equipped with a magnetic stirring bar, to the intermediate **3** was added 3.0 mL of DCM and *m*-CPBA (1.0 eq). The reaction mixture was stirred at 0 °C for 20 min. After completion of the reaction, as indicated by TLC, the aftertreatment residue was purified by flash column chromatography to furnish the chiral ligand **L2a**.

#### 5. Characterization data of chiral ligand L2a

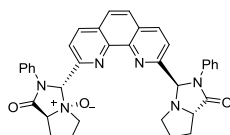

**L2a**: White solid; yield 37%, >20:1 dr; <sup>1</sup>H NMR (CD<sub>3</sub>OD, 400 MHz)  $\delta$ : 1.82-1.87 (m, 1H), 1.92-1.95 (m, 1H), 2.22-2.31 (m, 2H), 2.40-2.48 (m, 1H), 2.53-2.60 (m, 1H), 2.68-2.78 (m, 2H), 3.08-3.14 (m, 1H), 3.45-3.50 (m, 1H), 3.97-4.02 (m, 1H), 4.22-4.30 (m, 1H), 4.99 (d, *J* = 4.4 Hz,



1H), 5.40 (d,  $J = 6.8$  Hz, 1H), 6.23 (s, 1H), 6.94 (s, 1H), 7.00-7.04 (m, 1H), 7.08-7.12 (m, 1H), 7.17-7.24 (m, 4H), 7.45-7.52 (m, 4H), 7.64-7.76 (m, 3H), 7.92 (d,  $J = 8.0$  Hz, 1H), 8.19-8.35 (m, 2H);  $^{13}\text{C}$  NMR ( $\text{CD}_3\text{OD}$ , 100 MHz)  $\delta$ : 22.1, 24.3, 24.4, 27.5, 56.0, 65.5, 70.9, 77.2, 84.2, 87.8, 122.0, 122.5, 123.0, 125.4, 125.7, 126.4, 126.6, 127.2, 128.6, 128.8, 128.9, 129.5, 137.0, 137.1, 137.3, 145.7, 145.9, 151.2, 158.3, 169.4, 175.8; HRMS (ESI-TOF)  $m/z$ : Calcd. for  $\text{C}_{36}\text{H}_{32}\text{N}_6\text{NaO}_3$   $[\text{M}+\text{Na}]^+$ : 619.2420; Found: 619.2428.

## 6. The gram scale synthesis of the Phen-2NO ligand L1a

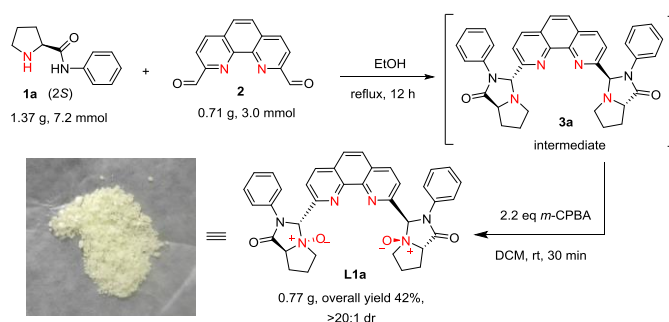

In a sealed tube equipped with a magnetic stirring bar, phenanthroline-dicarbaldehyde **2** (0.71 g, 3.0 mmol) and optically pure prolinamide **1a** (1.37 g, 7.2 mmol) were added. Then, anhydrous ethanol (30.0 mL) was added and the reaction was heated with stirring at reflux for 12 h. After completion of the reaction, as indicated by TLC, the aftertreatment residue was purified by flash column chromatography to give the intermediate **3a**.

For the oxidation step, see: X. Liu, L. Lin and X. Feng, Chiral  $N,N'$ -dioxide ligands: synthesis, coordination chemistry and asymmetric catalysis, *Org. Chem. Front.*, 2014, **1**, 298-302. In a sealed tube equipped with a magnetic stirring bar, to the intermediate **3** was added 20.0 mL of DCM and  $m$ -CPBA (2.2 eq). The reaction mixture was stirred at 0 °C for 30 min. After completion of the reaction, as indicated by TLC, the aftertreatment residue was purified by flash column chromatography to furnish the Phen-2NO ligand **L1a** (0.77 g, 42% overall yield, >20:1 dr).

## 7. Catalytic asymmetric synthesis of compounds 6

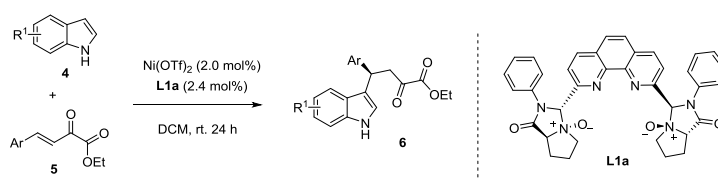

In a sealed tube equipped with a magnetic stirring bar, to the mixture of Ni(OTf)<sub>2</sub> (2.0 mol %), **L1a** (2.4 mol %) in 2.0 mL of CH<sub>2</sub>Cl<sub>2</sub> was added **4** (0.30 mmol), and **5** (0.20 mmol). The reaction mixture was stirred at room temperature for 24 h and was directly loaded onto a silica gel and purified by flash chromatography to give the desired product **6**, using hexane/EtOAc (10/1, v/v) as the eluent.

## 8. Characterization data of compounds **6**

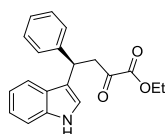

**6a**: Product in accordance with literature characterization data<sup>10a,c</sup>. 91% yield, 99% ee,  $[\alpha]_D^{20} = -27.2$  (*c* 0.70, CHCl<sub>3</sub>); The ee was determined by HPLC analysis using a Chiralpak IA column (95/5 hexane/*i*-PrOH; flow rate: 1.0 mL/min;  $\lambda = 254$  nm;  $\tau_{major} = 33.63$  min;  $\tau_{minor} = 42.85$  min); <sup>1</sup>H NMR (CDCl<sub>3</sub>, 400 MHz)  $\delta$ : 1.16-1.19 (m, 3H), 3.48-3.62 (m, 2H), 4.09-4.15 (m, 2H), 4.81-4.85 (m, 1H), 6.90-6.95 (m, 2H), 7.04-7.11 (m, 2H), 7.15-7.25 (m, 5H), 7.34 (d, *J* = 8.0 Hz, 1H), 7.96 (br s, 1H); <sup>13</sup>C NMR (CDCl<sub>3</sub>, 100 MHz)  $\delta$ : 12.9, 36.8, 44.6, 61.5, 110.2, 118.4, 120.6, 121.2, 125.5, 126.7, 127.5, 135.5, 142.2, 159.9, 192.1.

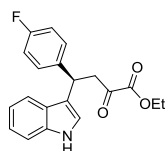

**6b**: Product in accordance with literature characterization data<sup>10c</sup>. 89% yield, 93% ee,  $[\alpha]_D^{20} = -22.7$  (*c* 0.45, CHCl<sub>3</sub>); The ee was determined by HPLC analysis using a Chiralpak IA column (95/5 hexane/*i*-PrOH; flow rate: 1.0 mL/min;  $\lambda = 254$  nm;  $\tau_{major} = 15.26$  min;  $\tau_{minor} = 22.01$  min); <sup>1</sup>H NMR (CDCl<sub>3</sub>, 400 MHz)  $\delta$ : 1.18-1.22 (m, 3H), 3.45-3.60 (m, 2H), 4.11-4.17 (m, 1H), 4.80-4.83 (m, 1H), 6.83-6.88 (m, 2H), 6.92-6.96 (m, 2H), 7.05-7.09 (m, 1H), 7.18-7.24 (m, 3H), 7.29 (d, *J* = 7.6 Hz, 1H), 8.00 (br s, 1H); <sup>13</sup>C NMR (CDCl<sub>3</sub>, 100 MHz)  $\delta$ : 13.9, 37.1, 45.7, 62.6, 111.3, 115.3 (d, *J*<sub>CF</sub> = 22.3 Hz), 118.2, 119.5 (d, *J*<sub>CF</sub> = 29.1 Hz), 121.5, 122.4, 126.3, 129.3 (d, *J*<sub>CF</sub> = 8.4 Hz), 136.6, 139.0, 161.0, 161.5 (d, *J*<sub>CF</sub> = 243.3 Hz), 193.0; HRMS (ESI-TOF) *m/z*: Calcd. for C<sub>20</sub>H<sub>18</sub>FNNaO<sub>3</sub> [M+Na]<sup>+</sup>: 362.1163; Found: 362.1168.

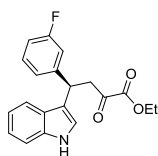

**6c:** Product in accordance with literature characterization data<sup>10b</sup>. 87% yield, 90% ee; The ee was determined by HPLC analysis using a Chiralpak IA column (95/5 hexane/*i*-PrOH; flow rate: 1.0 mL/min;  $\lambda = 254$  nm;  $\tau_{major} = 20.86$  min;  $\tau_{minor} = 24.62$  min); <sup>1</sup>H NMR (CDCl<sub>3</sub>, 400 MHz)  $\delta$ : 1.16-1.20 (m, 3H), 3.45-3.61 (m, 2H), 4.10-4.16 (m, 2H), 4.80-4.84 (m, 1H), 6.74-6.79 (m, 1H), 6.90-6.96 (m, 3H), 7.02-7.15 (m, 3H), 7.20 (d,  $J = 8.0$  Hz, 1H), 7.31 (d,  $J = 7.6$  Hz, 1H), 8.02 (br s, 1H); <sup>13</sup>C NMR (CDCl<sub>3</sub>, 100 MHz)  $\delta$ : 12.8, 36.4, 44.4, 61.6, 110.3, 112.5 (d,  $J_{CF} = 21.2$  Hz), 113.7 (d,  $J_{CF} = 22.3$  Hz), 116.5, 118.1, 118.5, 120.6, 121.3, 122.6 (d,  $J_{CF} = 2.4$  Hz), 125.2, 128.9 (d,  $J_{CF} = 8.1$  Hz), 129.1, 135.5, 145.0 (d,  $J_{CF} = 6.4$  Hz), 159.8, 161.8 (d,  $J_{CF} = 247.3$  Hz), 191.8.

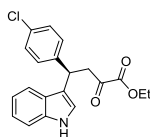

**6d:** Product in accordance with literature characterization data<sup>10b</sup>. 92% yield, 99% ee; The ee was determined by HPLC analysis using a Chiralpak IA column (95/5 hexane/*i*-PrOH; flow rate: 1.0 mL/min;  $\lambda = 254$  nm;  $\tau_{major} = 20.18$  min;  $\tau_{minor} = 25.48$  min); <sup>1</sup>H NMR (CDCl<sub>3</sub>, 400 MHz)  $\delta$ : 1.18-1.21 (m, 3H), 3.45-3.60 (m, 2H), 4.11-4.17 (m, 2H), 4.78-4.82 (m, 1H), 6.91-6.96 (m, 2H), 7.05-7.09 (m, 1H), 7.12-7.18 (m, 4H), 7.23 (d,  $J = 8.0$  Hz, 1H), 7.28 (d,  $J = 8.0$  Hz, 1H), 8.00 (br s, 1H); <sup>13</sup>C NMR (CDCl<sub>3</sub>, 100 MHz)  $\delta$ : 12.9, 36.1, 44.4, 61.6, 110.3, 116.7, 118.2, 118.6, 120.5, 121.4, 125.2, 127.6, 128.2, 131.2, 135.6, 140.8, 159.8, 191.8.

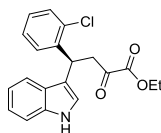

**6e:** Product in accordance with literature characterization data<sup>10b,c</sup>. 89% yield, 97% ee,  $[\alpha]_D^{20} = -22.1$  ( $c$  0.43, CHCl<sub>3</sub>); The ee was determined by HPLC analysis using a Chiralpak IA column (95/5 hexane/*i*-PrOH; flow rate: 1.0 mL/min;  $\lambda = 254$  nm;  $\tau_{major} = 27.09$  min;  $\tau_{minor} = 33.78$  min); <sup>1</sup>H NMR (CDCl<sub>3</sub>, 400 MHz)  $\delta$ : 1.18-1.21 (m, 3H), 3.36-3.42 (m, 1H), 3.59-3.66 (m, 1H), 4.13-4.18 (m, 2H), 5.34-5.38 (m, 1H), 6.92-6.96 (m, 2H), 7.00-7.06 (m, 3H), 7.10-7.12 (m, 1H),

7.21 (d,  $J = 8.4$  Hz, 1H), 7.28-7.30 (m, 1H), 7.35 (d,  $J = 8.0$  Hz, 1H), 8.03 (br s, 1H);  $^{13}\text{C}$  NMR ( $\text{CDCl}_3$ , 100 MHz)  $\delta$ : 12.9, 33.2, 43.6, 61.5, 110.2, 115.8, 118.3, 118.5, 121.1, 121.3, 125.4, 126.0, 126.9, 128.0, 128.7, 132.4, 135.5, 139.5, 159.9, 191.7.

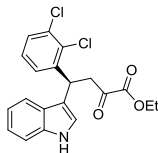

**6f**: 87% yield, 98% ee; The ee was determined by HPLC analysis using a Chiralpak IA column (95/5 hexane/*i*-PrOH; flow rate: 1.0 mL/min;  $\lambda = 254$  nm;  $\tau_{\text{major}} = 30.33$  min;  $\tau_{\text{minor}} = 38.88$  min);  $^1\text{H}$  NMR ( $\text{CDCl}_3$ , 400 MHz)  $\delta$ : 1.19-1.22 (m, 3H), 3.34-3.40 (m, 1H), 3.59-3.66 (m, 1H), 4.14-4.19 (m, 2H), 5.37-5.40 (m, 1H), 6.92-6.97 (m, 3H), 7.00-7.03 (m, 1H), 7.05-7.09 (m, 1H), 7.20-7.22 (m, 2H), 7.31 (d,  $J = 7.6$  Hz, 1H), 8.05 (br s, 1H);  $^{13}\text{C}$  NMR ( $\text{CDCl}_3$ , 100 MHz)  $\delta$ : 12.2, 33.4, 42.6, 60.9, 109.5, 114.8, 117.5, 118.0, 120.4, 120.8, 124.6, 125.4, 125.6, 127.0, 130.1, 131.6, 134.8, 141.3, 159.1, 190.6; HRMS (ESI-TOF)  $m/z$ : Calcd. for  $\text{C}_{20}\text{H}_{17}\text{Cl}_2\text{NNaO}_3$  [ $\text{M}+\text{Na}$ ] $^+$ : 412.0478; Found: 412.0484.

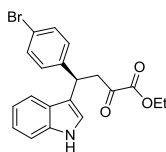

**6g**: Product in accordance with literature characterization data<sup>10b,c</sup>. 90% yield, 95% ee,  $[\alpha]_{\text{D}}^{20} = -27.9$  ( $c$  0.50,  $\text{CHCl}_3$ ); The ee was determined by HPLC analysis using a Chiralpak IA column (95/5 hexane/*i*-PrOH; flow rate: 1.0 mL/min;  $\lambda = 254$  nm;  $\tau_{\text{major}} = 16.04$  min;  $\tau_{\text{minor}} = 25.17$  min);  $^1\text{H}$  NMR ( $\text{CDCl}_3$ , 400 MHz)  $\delta$ : 1.18-1.21 (m, 3H), 3.44-3.60 (m, 2H), 4.11-4.17 (m, 2H), 4.76-4.80 (m, 1H), 6.90-6.96 (m, 2H), 7.05-7.12 (m, 3H), 7.21 (d,  $J = 8.0$  Hz, 1H), 7.27-7.29 (m, 3H), 8.01 (br s, 1H);  $^{13}\text{C}$  NMR ( $\text{CDCl}_3$ , 100 MHz)  $\delta$ : 11.7, 35.0, 43.1, 60.4, 109.1, 115.4, 117.0, 117.4, 118.1, 119.3, 120.2, 124.0, 127.4, 129.4, 134.3, 140.1, 158.6, 190.6.

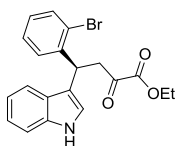

**6h**: Product in accordance with literature characterization data<sup>10c</sup>. 88% yield, 98% ee,  $[\alpha]_{\text{D}}^{20} = -28.2$  ( $c$  0.43,  $\text{CHCl}_3$ ); The ee was determined by HPLC analysis using a Chiralpak IA column

(95/5 hexane/*i*-PrOH; flow rate: 1.0 mL/min;  $\lambda = 254$  nm;  $\tau_{major} = 15.51$  min;  $\tau_{minor} = 18.78$  min);  $^1\text{H}$  NMR ( $\text{CDCl}_3$ , 400 MHz)  $\delta$ : 1.18-1.22 (m, 3H), 3.34-3.39 (m, 1H), 3.58-3.65 (m, 1H), 4.13-4.19 (m, 2H), 5.32-5.35 (m, 1H), 6.93-6.97 (m, 3H), 7.03-7.11 (m, 3H), 7.21 (d,  $J = 8.4$  Hz, 1H), 7.35 (d,  $J = 8.0$  Hz, 1H), 7.48-7.50 (m, 1H), 8.03 (br s, 1H);  $^{13}\text{C}$  NMR ( $\text{CDCl}_3$ , 100 MHz)  $\delta$ : 14.0, 37.1, 44.8, 62.6, 111.3, 117.0, 119.5, 119.6, 122.2, 122.4, 124.3, 126.5, 127.8, 128.3, 129.2, 133.1, 136.6, 142.2, 161.0, 192.7; HRMS (ESI-TOF)  $m/z$ : Calcd. for  $\text{C}_{20}\text{H}_{18}\text{BrNNaO}_3$   $[\text{M}+\text{Na}]^+$ : 422.0362; Found: 422.0365.

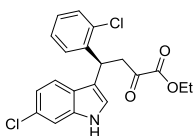

**6i**: 82% yield, 95% ee; The ee was determined by HPLC analysis using a Chiralpak IA column (95/5 hexane/*i*-PrOH; flow rate: 1.0 mL/min;  $\lambda = 254$  nm;  $\tau_{major} = 15.40$  min;  $\tau_{minor} = 13.50$  min);  $^1\text{H}$  NMR ( $\text{DMSO}-d_6$ , 400 MHz)  $\delta$ : 1.21-1.24 (m, 3H), 3.35-3.41 (m, 1H), 3.58-3.64 (m, 1H), 4.16-4.21 (m, 2H), 5.29-5.33 (m, 1H), 6.90-6.96 (m, 2H), 7.03-7.09 (m, 3H), 7.21-7.24 (m, 2H), 7.29-7.32 (m, 1H), 8.05 (br s, 1H);  $^{13}\text{C}$  NMR ( $\text{DMSO}-d_6$ , 100 MHz)  $\delta$ : 14.2, 33.6, 44.7, 62.3, 111.6, 116.6, 119.4, 120.1, 124.6, 125.4, 126.5, 127.9, 128.5, 129.7, 129.8, 132.9, 137.2, 141.5, 160.8, 192.6; HRMS (ESI-TOF)  $m/z$ : Calcd. for  $\text{C}_{20}\text{H}_{17}\text{Cl}_2\text{NNaO}_3$   $[\text{M}+\text{Na}]^+$ : 412.0478; Found: 412.0479.

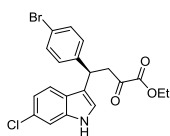

**6j**: 85% yield, 91% ee; The ee was determined by HPLC analysis using a Chiralpak IA column (95/5 hexane/*i*-PrOH; flow rate: 1.0 mL/min;  $\lambda = 254$  nm;  $\tau_{major} = 19.42$  min;  $\tau_{minor} = 16.17$  min);  $^1\text{H}$  NMR ( $\text{CDCl}_3$ , 400 MHz)  $\delta$ : 1.20-1.23 (m, 3H), 3.43-3.58 (m, 2H), 4.14-4.19 (m, 2H), 4.73-4.76 (m, 1H), 6.89-6.94 (m, 2H), 7.08-7.10 (m, 2H), 7.15 (d,  $J = 8.4$  Hz, 1H), 7.22 (d,  $J = 1.6$  Hz, 1H), 7.29-7.31 (m, 2H), 8.04 (br s, 1H);  $^{13}\text{C}$  NMR ( $\text{CDCl}_3$ , 100 MHz)  $\delta$ : 12.9, 36.0, 44.2, 61.7, 110.2, 116.9, 119.1, 119.4, 119.5, 121.1, 123.8, 127.4, 128.5, 130.7, 135.9, 141.0, 159.8, 191.6; HRMS (ESI-TOF)  $m/z$ : Calcd. for  $\text{C}_{20}\text{H}_{17}\text{BrClNNaO}_3$   $[\text{M}+\text{Na}]^+$ : 455.9973; Found: 455.9977.

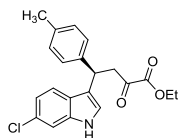

**6k:** 83% yield, 91% ee; The ee was determined by HPLC analysis using a Chiralpak IA column (95/5 hexane/*i*-PrOH; flow rate: 1.0 mL/min;  $\lambda = 254$  nm;  $\tau_{major} = 17.61$  min;  $\tau_{minor} = 15.15$  min);  $^1\text{H NMR}$  ( $\text{CDCl}_3$ , 400 MHz)  $\delta$ : 1.18-1.22 (m, 3H), 2.20 (s, 3H), 3.44-3.59 (m, 2H), 4.12-4.17 (m, 2H), 4.74-4.77 (m, 1H), 6.88-6.94 (m, 2H), 6.99 (d,  $J = 8.0$  Hz, 2H), 7.10 (d,  $J = 8.0$  Hz, 2H), 7.20-7.22 (m, 2H), 7.97 (br s, 1H);  $^{13}\text{C NMR}$  ( $\text{CDCl}_3$ , 100 MHz)  $\delta$ : 12.9, 36.0, 44.2, 61.7, 110.2, 116.9, 119.1, 119.4, 119.5, 121.1, 123.8, 127.4, 128.5, 130.7, 135.9, 141.0, 159.8, 191.6; HRMS (ESI-TOF)  $m/z$ : Calcd. for  $\text{C}_{21}\text{H}_{20}\text{ClNNaO}_3$   $[\text{M}+\text{Na}]^+$ : 392.1024; Found: 392.1024.

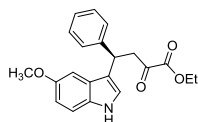

**6l:** Product in accordance with literature characterization data<sup>10b,c</sup>. 91% yield, 93% ee,  $[\alpha]_D^{20} = -55.2$  ( $c$  0.57,  $\text{CHCl}_3$ ); The ee was determined by HPLC analysis using a Chiralpak IA column (95/5 hexane/*i*-PrOH; flow rate: 1.0 mL/min;  $\lambda = 254$  nm;  $\tau_{major} = 31.16$  min;  $\tau_{minor} = 36.82$  min);  $^1\text{H NMR}$  ( $\text{CDCl}_3$ , 400 MHz)  $\delta$ : 1.23-1.27 (m, 3H), 3.54-3.68 (m, 2H), 3.73 (s, 3H), 4.17-4.22 (m, 2H), 4.83-4.87 (m, 1H), 6.77-6.83 (m, 2H), 6.94 (d,  $J = 2.4$  Hz, 1H), 7.14-7.18 (m, 2H), 7.22-7.27 (m, 2H), 7.31-7.33 (m, 2H), 7.99 (br s, 1H);  $^{13}\text{C NMR}$  ( $\text{CDCl}_3$ , 100 MHz)  $\delta$ : 13.9, 37.8, 45.6, 55.9, 62.6, 101.4, 112.0, 112.3, 117.9, 122.4, 126.6, 126.9, 127.8, 128.6, 131.8, 143.3, 153.9, 161.0, 193.3.

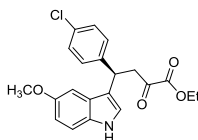

**6m:** Product in accordance with literature characterization data<sup>10c</sup>. 92% yield, 95% ee,  $[\alpha]_D^{20} = -34.4$  ( $c$  0.37,  $\text{CHCl}_3$ ); The ee was determined by HPLC analysis using a Chiralpak IA column (95/5 hexane/*i*-PrOH; flow rate: 1.0 mL/min;  $\lambda = 254$  nm;  $\tau_{major} = 13.75$  min;  $\tau_{minor} = 19.70$  min);  $^1\text{H NMR}$  ( $\text{CDCl}_3$ , 400 MHz)  $\delta$ : 1.19-1.23 (m, 3H), 3.44-3.57 (m, 2H), 3.67 (s, 3H), 4.13-4.18 (m, 2H), 4.73-4.77 (m, 1H), 6.70-6.76 (m, 2H), 6.91 (d,  $J = 2.4$  Hz, 1H), 7.11-7.19 (m, 5H), 7.91 (br s, 1H);  $^{13}\text{C NMR}$  ( $\text{CDCl}_3$ , 100 MHz)  $\delta$ : 13.9, 37.1, 45.4, 55.9, 62.6, 101.3, 111.9, 112.4, 117.6, 122.2,

126.7, 128.7, 129.2, 131.7, 132.3, 141.8, 154.0, 160.9, 192.8; HRMS (ESI-TOF)  $m/z$ : Calcd. for  $C_{21}H_{20}ClNNaO_4 [M+Na]^+$ : 408.0973; Found: 408.0969.

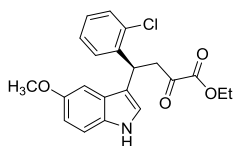

**6n**: Product in accordance with literature characterization data<sup>10c</sup>. 92% yield, 97% ee,  $[\alpha]_D^{20} = -37.2$  ( $c$  0.36,  $CHCl_3$ ); The ee was determined by HPLC analysis using a Chiralpak IA column (95/5 hexane/*i*-PrOH; flow rate: 1.0 mL/min;  $\lambda = 254$  nm;  $\tau_{major} = 9.40$  min;  $\tau_{minor} = 16.28$  min);  $^1H$  NMR ( $DMSO-d_6$ , 400 MHz)  $\delta$ : 1.21-1.25 (m, 3H), 3.49-3.55 (m, 1H), 3.68 (s, 3H), 3.76-3.83 (m, 1H), 4.17-4.23 (m, 2H), 5.16-5.19 (m, 1H), 6.71-6.74 (m, 1H), 6.88 (d,  $J = 2.4$  Hz, 1H), 7.17-7.25 (m, 4H), 7.38-7.44 (m, 2H), 10.81 (br s, 1H);  $^{13}C$  NMR ( $DMSO-d_6$ , 100 MHz)  $\delta$ : 14.2, 33.7, 44.7, 55.7, 62.3, 100.9, 111.5, 112.7, 116.2, 123.8, 127.8, 128.3, 129.7, 129.8, 132.0, 141.7, 153.5, 160.8, 192.8; HRMS (ESI-TOF)  $m/z$ : Calcd. for  $C_{21}H_{20}ClNNaO_4 [M+Na]^+$ : 408.0973; Found: 408.0974.

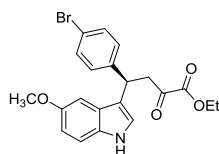

**6o**: Product in accordance with literature characterization data<sup>10c</sup>. 93% yield, 96% ee,  $[\alpha]_D^{20} = -45.0$  ( $c$  0.24,  $CHCl_3$ ); The ee was determined by HPLC analysis using a Chiralpak IA column (95/5 hexane/*i*-PrOH; flow rate: 1.0 mL/min;  $\lambda = 254$  nm;  $\tau_{major} = 36.32$  min;  $\tau_{minor} = 53.68$  min);  $^1H$  NMR ( $CDCl_3$ , 400 MHz)  $\delta$ : 1.16-1.20 (m, 3H), 3.42-3.57 (m, 2H), 3.65 (s, 3H), 4.10-4.16 (m, 2H), 4.70-4.74 (m, 1H), 6.69-6.73 (m, 2H), 6.85 (s, 1H), 7.06-7.10 (m, 3H), 7.26 (d,  $J = 8.8$  Hz, 2H), 7.99 (br s, 1H);  $^{13}C$  NMR ( $CDCl_3$ , 100 MHz)  $\delta$ : 12.2, 35.4, 43.5, 54.1, 60.9, 99.5, 110.2, 110.6, 115.7, 118.6, 120.5, 124.9, 127.8, 129.8, 130.0, 140.5, 152.2, 159.1, 191.0; HRMS (ESI-TOF)  $m/z$ : Calcd. for  $C_{21}H_{20}BrNNaO_4 [M+Na]^+$ : 452.0468; Found: 452.0474.

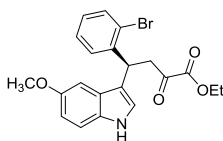

**6p**: Product in accordance with literature characterization data<sup>10c</sup>. 91% yield, 97% ee,  $[\alpha]_D^{20} =$

-42.5 (*c* 0.37, CHCl<sub>3</sub>); The ee was determined by HPLC analysis using a Chiralpak IA column (95/5 hexane/*i*-PrOH; flow rate: 1.0 mL/min;  $\lambda = 254$  nm;  $\tau_{major} = 9.64$  min;  $\tau_{minor} = 15.29$  min); <sup>1</sup>H NMR (CDCl<sub>3</sub>, 400 MHz)  $\delta$ : 1.90-1.23 (m, 3H), 3.34-3.39 (m, 1H), 3.57-3.64 (m, 1H), 3.68 (s, 3H), 4.14-4.19 (m, 2H), 5.27-5.31 (m, 1H), 6.71-6.74 (m, 1H), 6.82 (d, *J* = 2.4 Hz, 1H), 6.92-6.97 (m, 2H), 7.05-7.13 (m, 3H), 7.48-7.50 (m, 1H), 7.95 (br s, 1H); <sup>13</sup>C NMR (CDCl<sub>3</sub>, 100 MHz)  $\delta$ : 12.9, 35.9, 43.7, 54.8, 61.5, 100.3, 110.8, 111.5, 121.6, 123.2, 125.9, 126.7, 127.2, 128.2, 130.6, 132.0, 141.1, 152.9, 159.9, 191.6; HRMS (ESI-TOF) *m/z*: Calcd. for C<sub>21</sub>H<sub>20</sub>BrNNaO<sub>4</sub> [M+Na]<sup>+</sup>: 452.0468; Found: 452.0462.

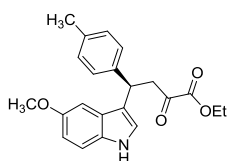

**6q**: 88% yield, 95% ee; The ee was determined by HPLC analysis using a Chiralpak IA column (95/5 hexane/*i*-PrOH; flow rate: 1.0 mL/min;  $\lambda = 254$  nm;  $\tau_{major} = 21.54$  min;  $\tau_{minor} = 18.18$  min); <sup>1</sup>H NMR (CDCl<sub>3</sub>, 400 MHz)  $\delta$ : 1.14-1.18 (m, 3H), 2.18 (s, 3H), 3.44-3.58 (m, 2H), 3.65 (s, 3H), 4.08-4.13 (m, 2H), 4.71-4.75 (m, 1H), 6.68-6.71 (m, 1H), 6.76 (d, *J* = 2.4 Hz, 1H), 6.84 (d, *J* = 2.4 Hz, 1H), 6.97 (d, *J* = 8.0 Hz, 2H), 7.05 (d, *J* = 8.8 Hz, 1H), 7.12 (d, *J* = 8.8 Hz, 2H), 7.91 (br s, 1H); <sup>13</sup>C NMR (CDCl<sub>3</sub>, 100 MHz)  $\delta$ : 12.4, 19.5, 35.9, 44.1, 54.3, 60.9, 99.9, 110.3, 110.7, 116.7, 120.7, 125.3, 126.1, 127.7, 130.2, 134.5, 138.6, 152.3, 159.5, 191.8; HRMS (ESI-TOF) *m/z*: Calcd. for C<sub>22</sub>H<sub>23</sub>NNaO<sub>4</sub> [M+Na]<sup>+</sup>: 388.1519; Found: 388.1527.

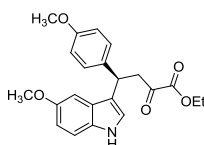

**6r**: 90% yield, 98% ee; The ee was determined by HPLC analysis using a Chiralpak IA column (95/5 hexane/*i*-PrOH; flow rate: 1.0 mL/min;  $\lambda = 254$  nm;  $\tau_{major} = 58.96$  min;  $\tau_{minor} = 73.92$  min); <sup>1</sup>H NMR (CDCl<sub>3</sub>, 400 MHz)  $\delta$ : 1.17-1.20 (m, 3H), 3.43-3.57 (m, 2H), 3.66 (s, 3H), 3.67 (s, 3H), 4.10-4.16 (m, 2H), 4.71-4.75 (m, 1H), 6.70-6.76 (m, 4H), 6.87 (d, *J* = 2.0 Hz, 1H), 7.08 (d, *J* = 8.8 Hz, 1H), 7.15 (d, *J* = 9.6 Hz, 2H), 7.91 (br s, 1H); <sup>13</sup>C NMR (CDCl<sub>3</sub>, 100 MHz)  $\delta$ : 12.9, 36.0, 44.7, 54.2, 54.8, 61.5, 100.4, 110.8, 111.2, 112.9, 117.2, 121.2, 125.8, 127.7, 130.7, 134.3, 152.8, 157.1, 160.0, 192.3; HRMS (ESI-TOF) *m/z*: Calcd. for C<sub>22</sub>H<sub>23</sub>NNaO<sub>5</sub> [M+Na]<sup>+</sup>: 404.1468; Found:



404.1474.

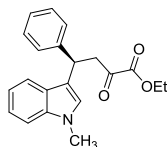

**6s**: Product in accordance with literature characterization data<sup>10a,c</sup>. 71% yield, 50% ee,  $[\alpha]_D^{20} = -12.4$  ( $c$  0.38,  $\text{CHCl}_3$ ); The ee was determined by HPLC analysis using a Chiralpak IA column (85/15 hexane/*i*-PrOH; flow rate: 1.0 mL/min;  $\lambda = 254$  nm;  $\tau_{\text{major}} = 16.07$  min;  $\tau_{\text{minor}} = 15.24$  min);  $^1\text{H}$  NMR ( $\text{DMSO-}d_6$ , 400 MHz)  $\delta$ : 1.20-1.23 (m, 3H), 3.55-3.62 (m, 1H), 3.68-3.74 (m, 4H), 4.15-4.21 (m, 2H), 4.70-4.74 (m, 1H), 6.92-6.95 (m, 1H), 7.08-7.14 (m, 2H), 7.22-7.25 (m, 3H), 7.33-7.36 (m, 3H), 7.42 (d,  $J = 7.6$  Hz, 1H);  $^{13}\text{C}$  NMR ( $\text{DMSO-}d_6$ , 100 MHz)  $\delta$ : 14.2, 32.8, 37.4, 45.5, 62.3, 110.1, 117.0, 118.9, 119.3, 121.7, 126.6, 126.9, 127.0, 128.1, 128.7, 137.2, 144.8, 161.0, 193.0.

## 9. Control experiments and HPLC spectra for compound 6a

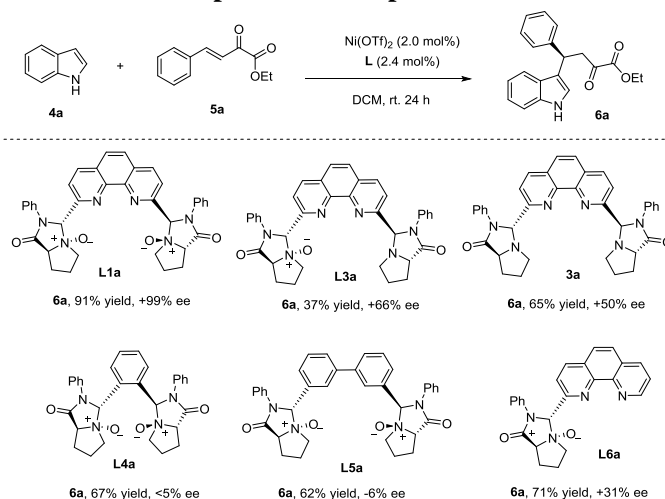

In a sealed tube equipped with a magnetic stirring bar, to the mixture of  $\text{Ni(OTf)}_2$  (2.0 mol %), **L** (2.4 mol %) in 2.0 mL of  $\text{CH}_2\text{Cl}_2$  was added **4** (0.30 mmol), and **5** (0.20 mmol). The reaction mixture was stirred at room temperature for 24 h and was directly loaded onto a silica gel and purified by flash chromatography to give the desired product **6a**, using hexane/EtOAc (10/1, v/v) as the eluent.

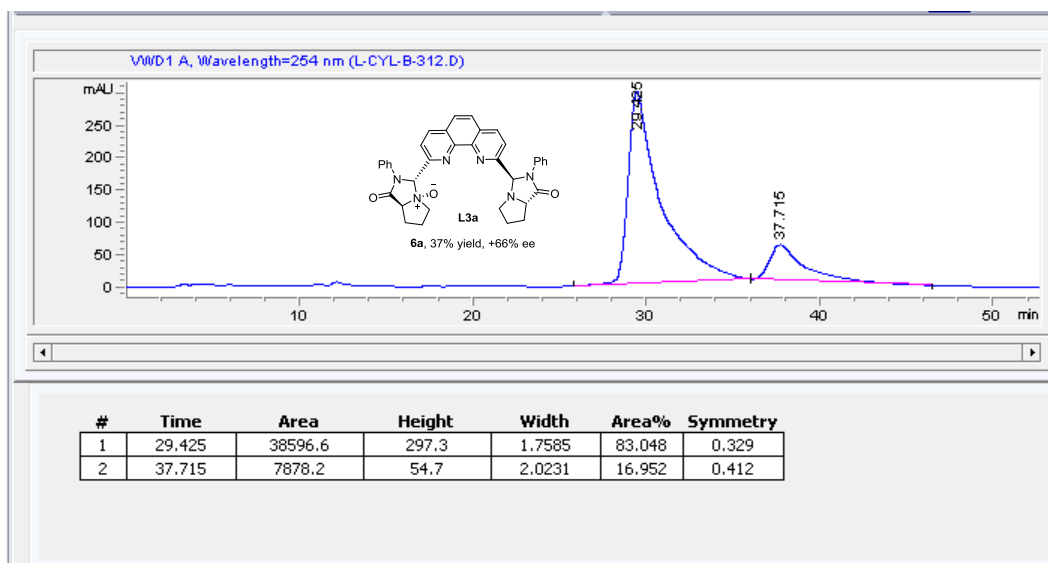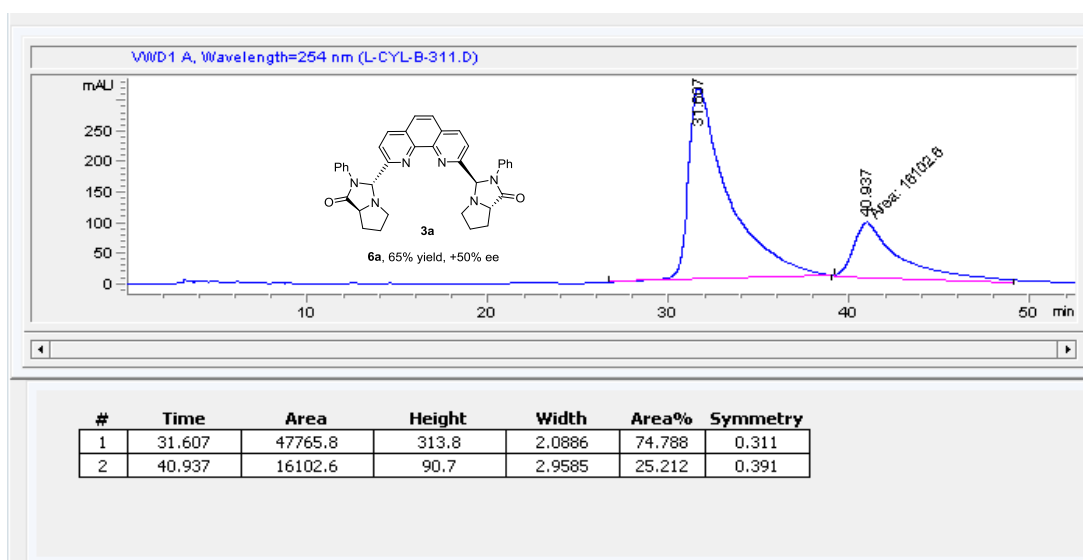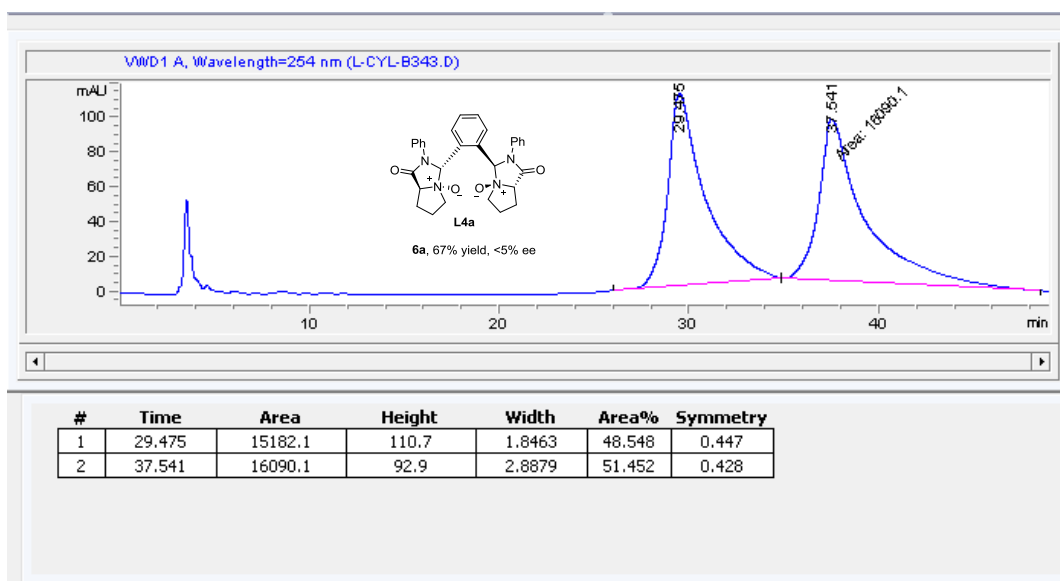

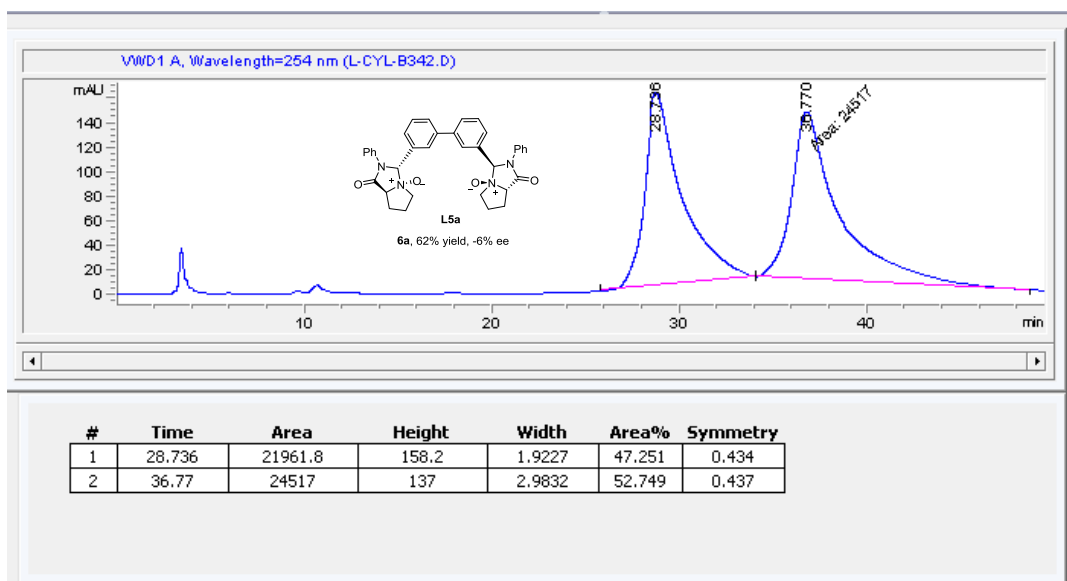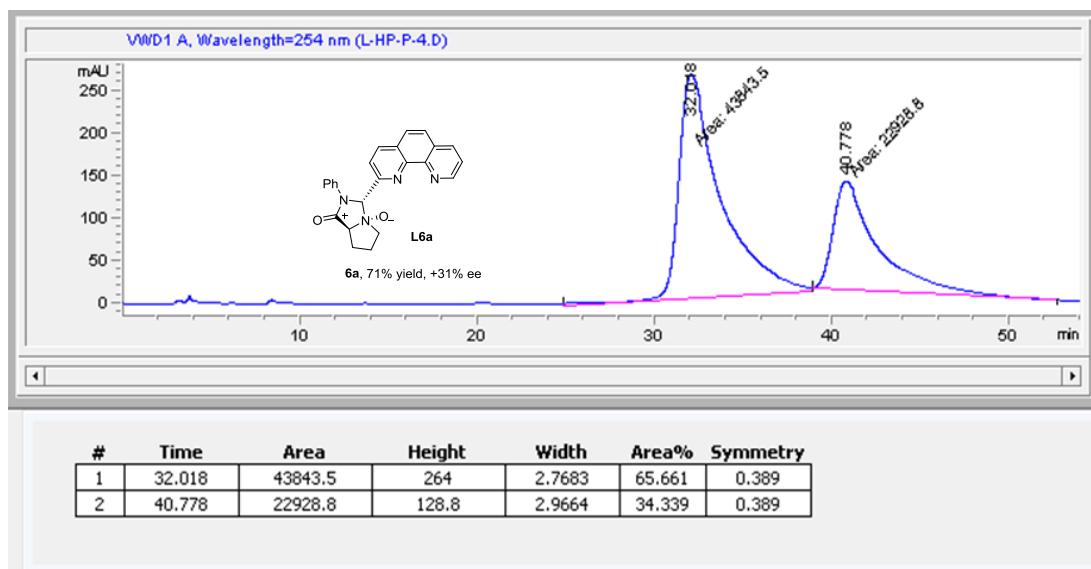

## 10. References

- (a) Y. Liu, D. Shang, X. Zhou, Y. Zhu, L. Lin, X. Liu and X. Feng, *Org. Lett.*, 2010, **12**, 180-183; (b) S. Yu, Q. Cai, C. Wang, J. Hou, J. Liang, Z. Jiao, C. Yao and Y. M. Li, *J. Org. Chem.*, 2023, **88**, 3046-3053; (c) Y. H. Wang, P. Hu, X. R. Wang, K. L. Xu, Q. L. Wang, H. J. Wang and X. L. Liu, *Org. Chem. Front.*, 2024, DOI: 10.1039/D3QO01748F.

## 11. X-ray crystal data for compounds 3i

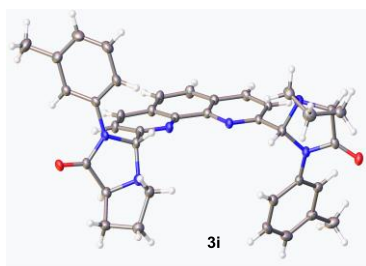

CCDC 2297366

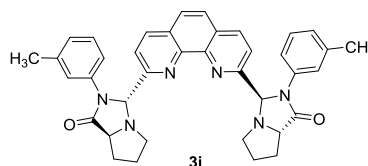

**Table S1 Crystal data and structure refinement for 3i**

|                                                      |                                                                   |
|------------------------------------------------------|-------------------------------------------------------------------|
| Identification code                                  | <b>3i</b>                                                         |
| Empirical formula                                    | $C_{38}H_{40}N_6O_4$                                              |
| Formula weight                                       | 644.76                                                            |
| Temperature/K                                        | 99.97(13)                                                         |
| Crystal system                                       | orthorhombic                                                      |
| Space group                                          | $P2_12_12_1$                                                      |
| $a/\text{\AA}$ , $b/\text{\AA}$ , $c/\text{\AA}$     | 9.32674(13), 13.9964(2), 25.3147(3)                               |
| $\alpha/^\circ$ , $\beta/^\circ$ , $\gamma/^\circ$ , | 90, 90, 90                                                        |
| Volume/ $\text{\AA}^3$                               | 3304.59(8)                                                        |
| Z                                                    | 4                                                                 |
| $\rho_{\text{calc}}/\text{cm}^3$                     | 1.296                                                             |
| $\mu/\text{mm}^{-1}$                                 | 0.690                                                             |
| F(000)                                               | 1368.0                                                            |
| Radiation                                            | Cu K $\alpha$ ( $\lambda = 1.54184$ )                             |
| Crystal size/ $\text{mm}^3$                          | $0.15 \times 0.13 \times 0.12$                                    |
| $2\Theta$ range for data collection/ $^\circ$        | 6.984 to 148.426                                                  |
| Index ranges                                         | $-8 \leq h \leq 11$ , $-17 \leq k \leq 13$ , $-31 \leq l \leq 30$ |
| Reflections collected                                | 16596                                                             |
| Independent reflections                              | 6509 [ $R_{\text{int}} = 0.0389$ , $R_{\text{sigma}} = 0.0407$ ]  |
| Data/restraints/parameters                           | 6509/3/446                                                        |
| Goodness-of-fit on $F^2$                             | 1.026                                                             |
| Final R indexes [ $I \geq 2\sigma(I)$ ]              | $R_1 = 0.0446$ , $wR_2 = 0.1248$                                  |
| Final R indexes [all data]                           | $R_1 = 0.0463$ , $wR_2 = 0.1264$                                  |
| Largest diff. peak/hole / $e \text{\AA}^{-3}$        | 0.39/-0.36                                                        |
| Flack parameter                                      | 0.01(13)/0.01(10)                                                 |

**Crystal Data** for  $C_{38}H_{40}N_6O_4$  ( $M = 644.76$  g/mol): orthorhombic, space group  $P2_12_12_1$  (no. 19),  $a = 9.32674(13)$   $\text{\AA}$ ,  $b = 13.9964(2)$   $\text{\AA}$ ,  $c = 25.3147(3)$   $\text{\AA}$ ,  $V = 3304.59(8)$   $\text{\AA}^3$ ,  $Z = 4$ ,  $T = 99.97(13)$  K,  $\mu(\text{Cu K}\alpha) = 0.690$   $\text{mm}^{-1}$ ,  $D_{\text{calc}} = 1.296$   $\text{g/cm}^3$ , 16596 reflections measured ( $6.984^\circ \leq 2\Theta \leq 148.426^\circ$ ), 6509 unique ( $R_{\text{int}} = 0.0389$ ,  $R_{\text{sigma}} = 0.0407$ ) which were used in all calculations. The final  $R_1$  was 0.0446 ( $I > 2\sigma(I)$ ) and  $wR_2$  was 0.1264 (all data).

12. The copies of  $^1\text{H}$  NMR,  $^{13}\text{C}$  NMR and HPLC spectra for compounds 3, L and 6

$^1\text{H}$  and  $^{13}\text{C}$  NMR of 3a

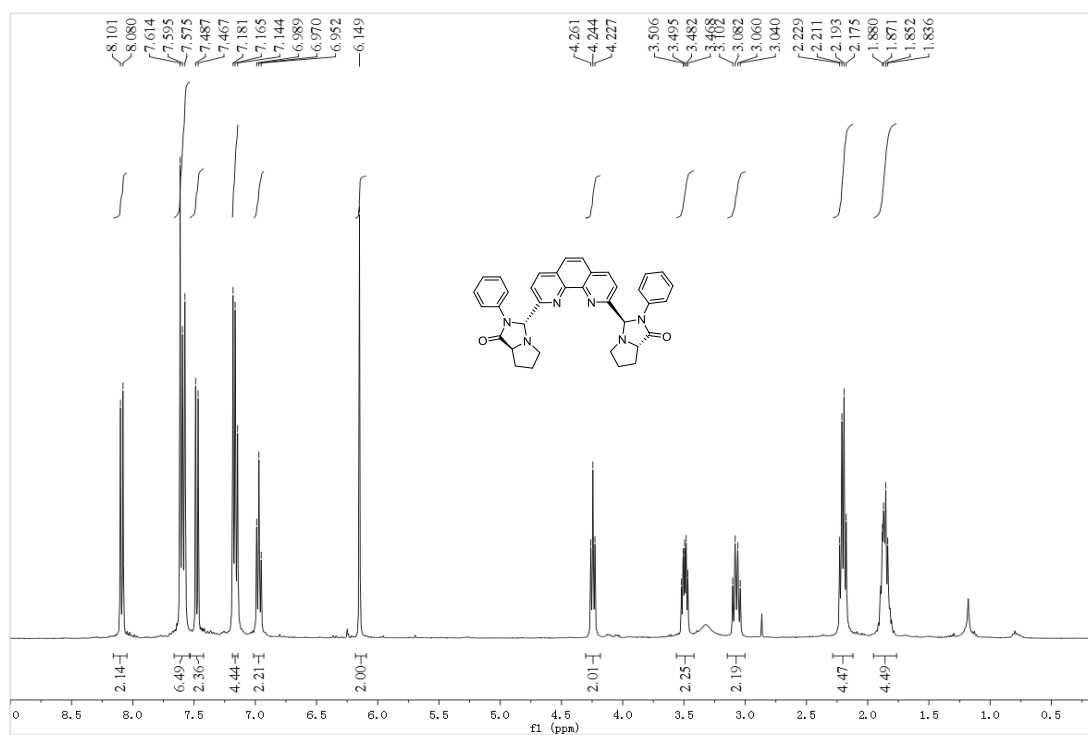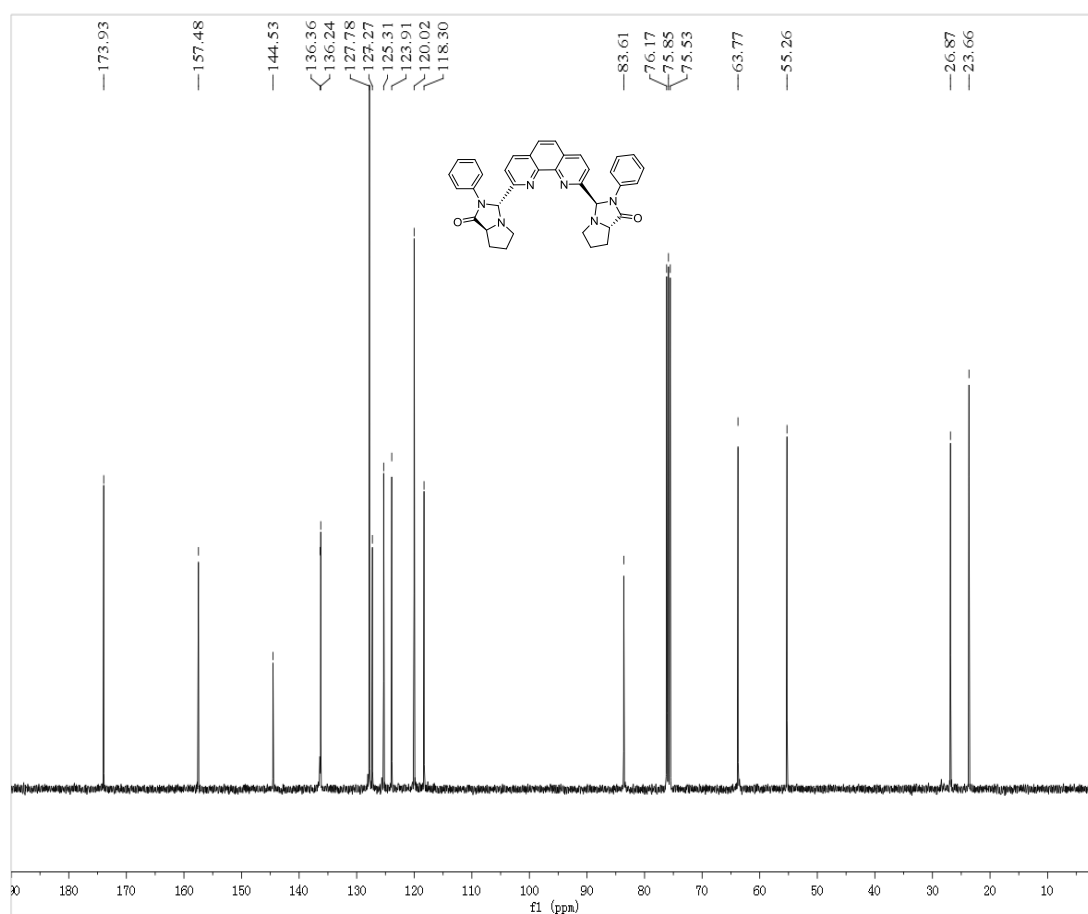

# <sup>1</sup>H and <sup>13</sup>C NMR of 3i

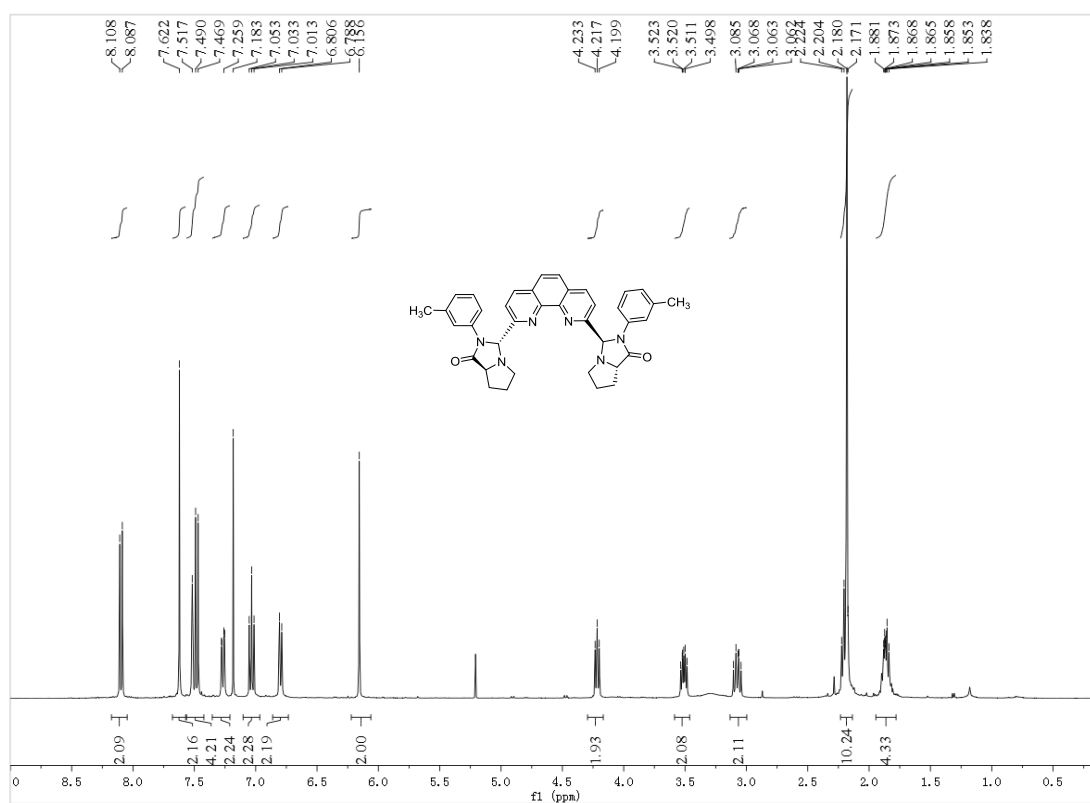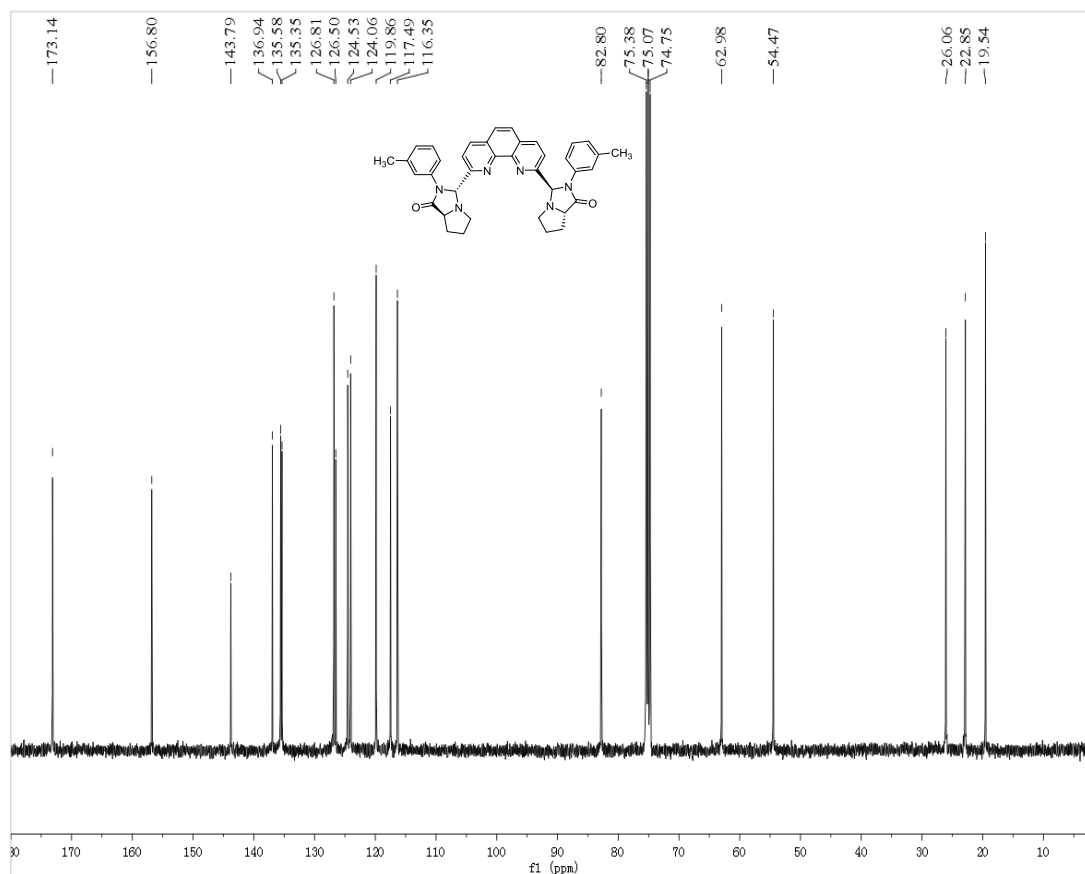

# $^1\text{H}$ and $^{13}\text{C}$ NMR of L1a

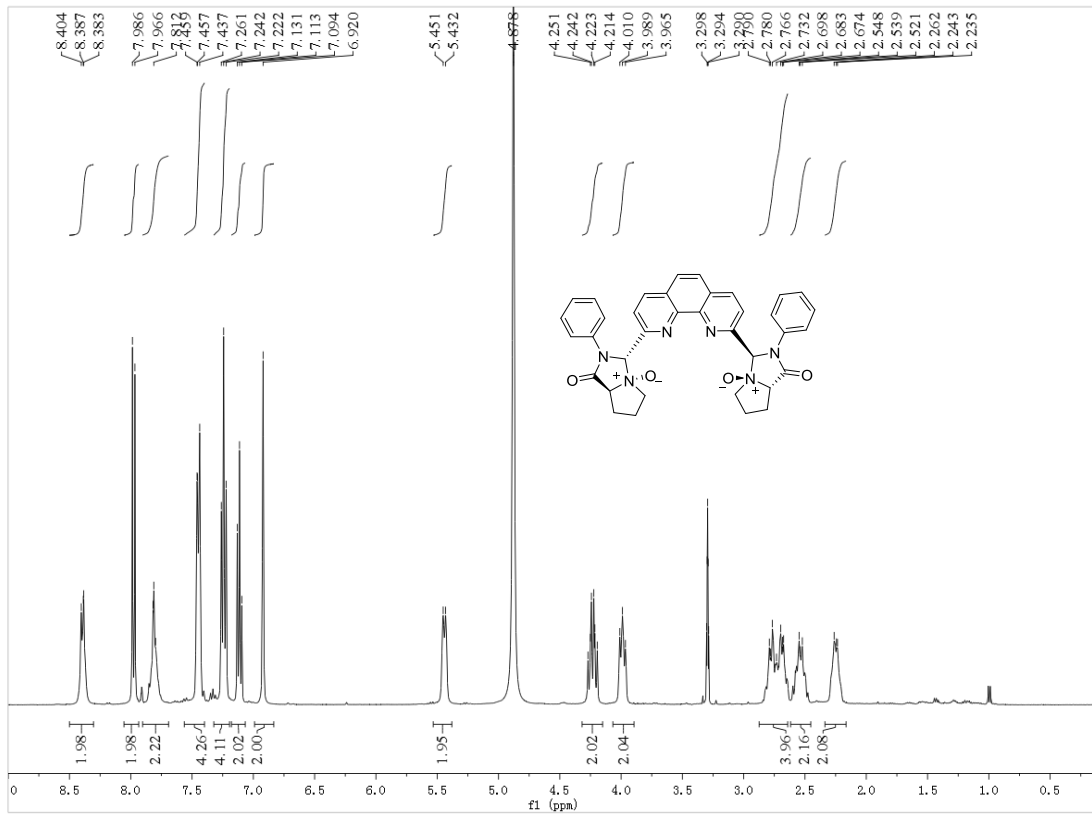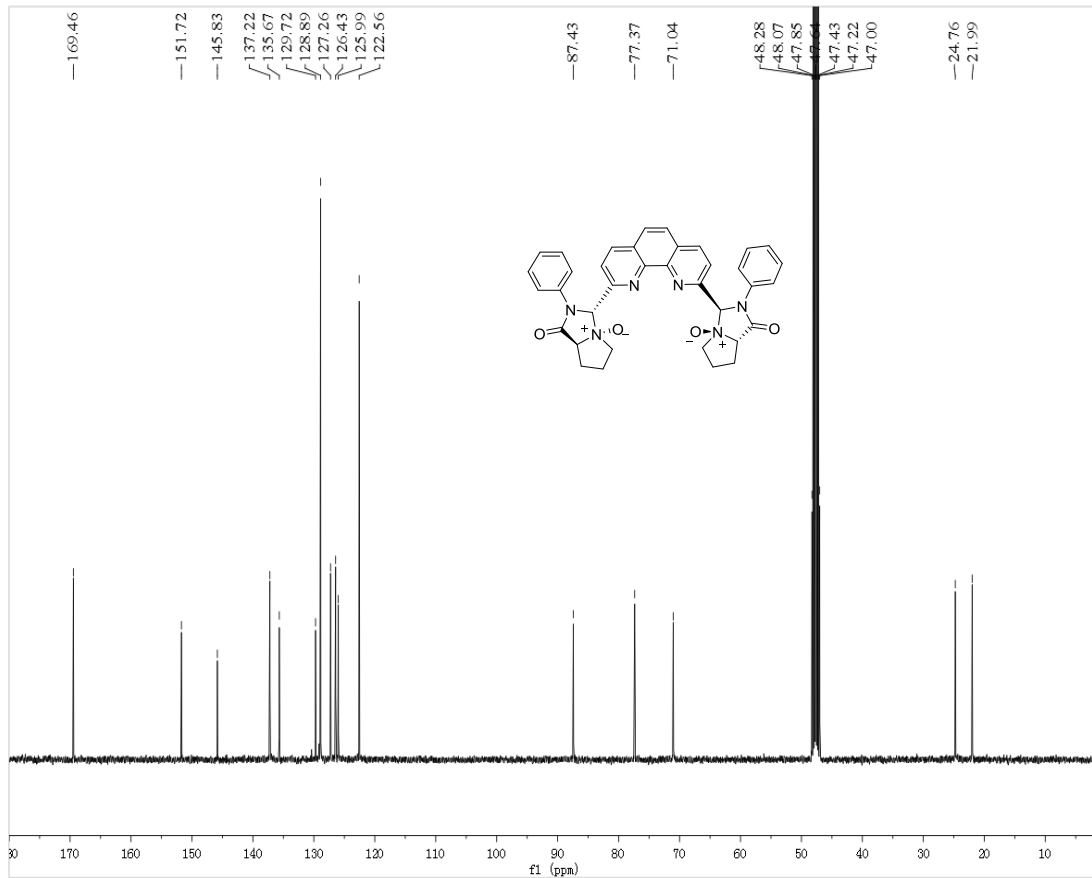

# $^1\text{H}$ and $^{13}\text{C}$ NMR of L1b

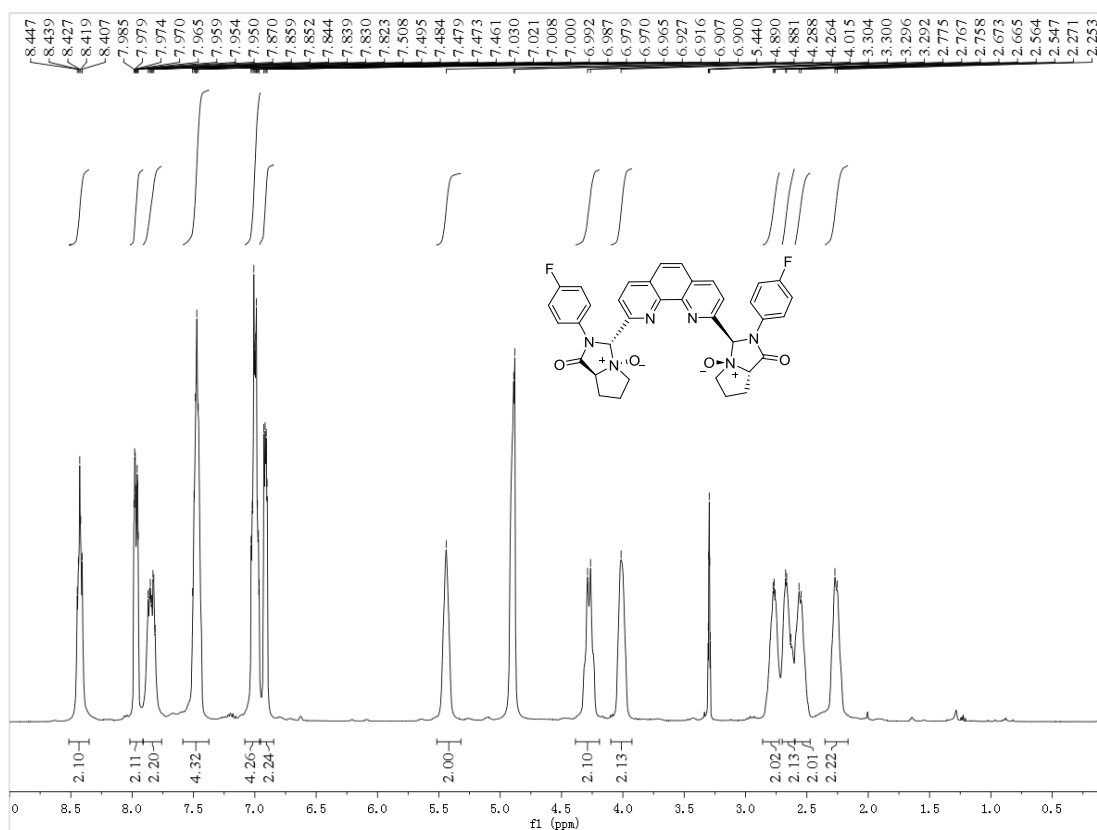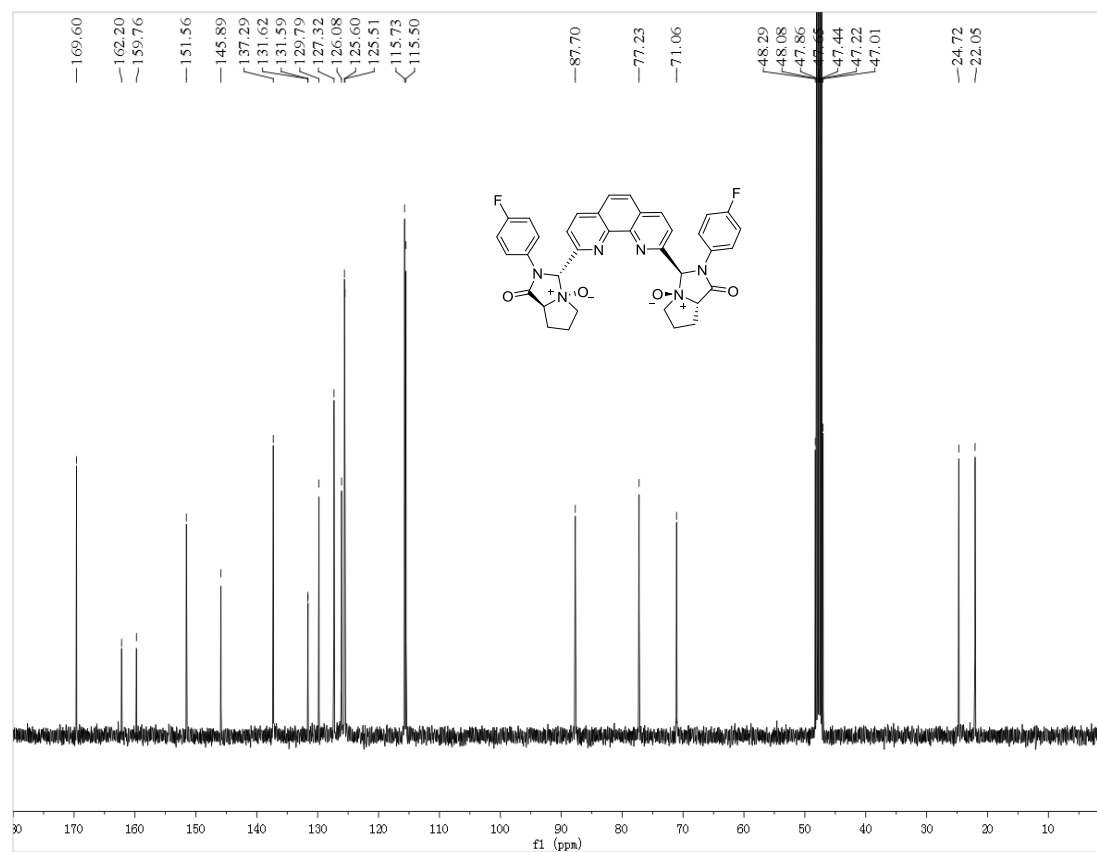



# $^1\text{H}$ and $^{13}\text{C}$ NMR of L1c

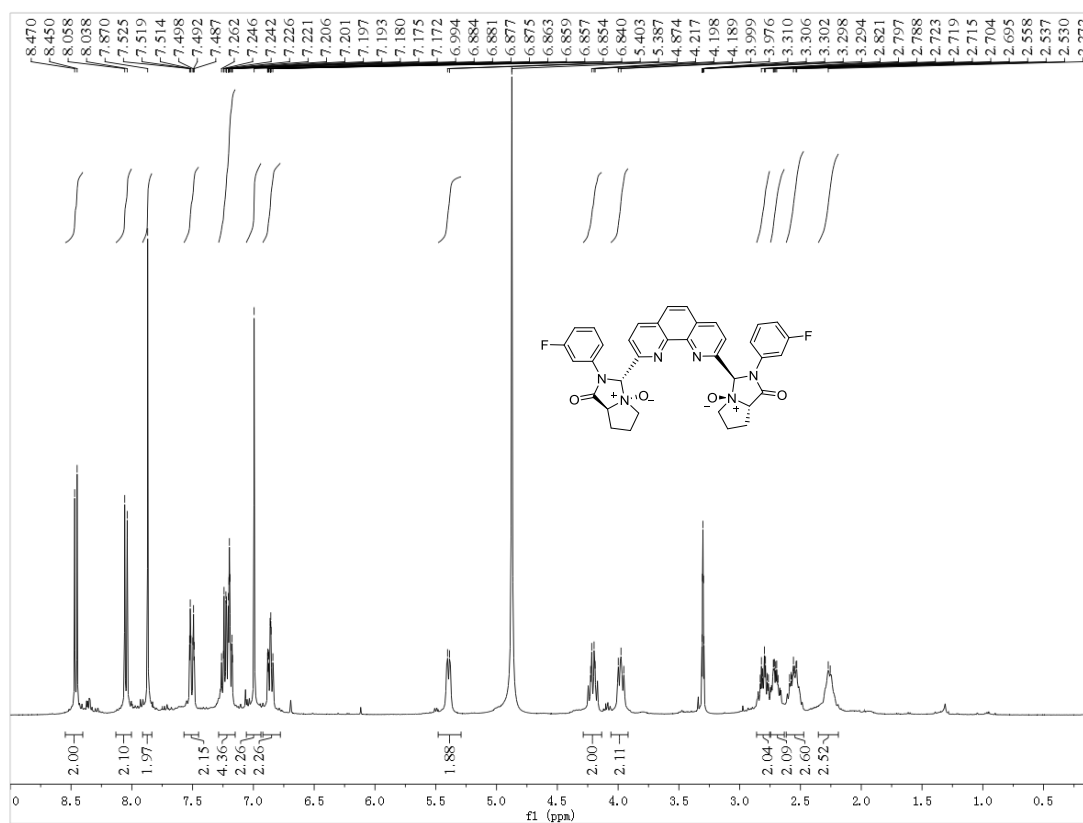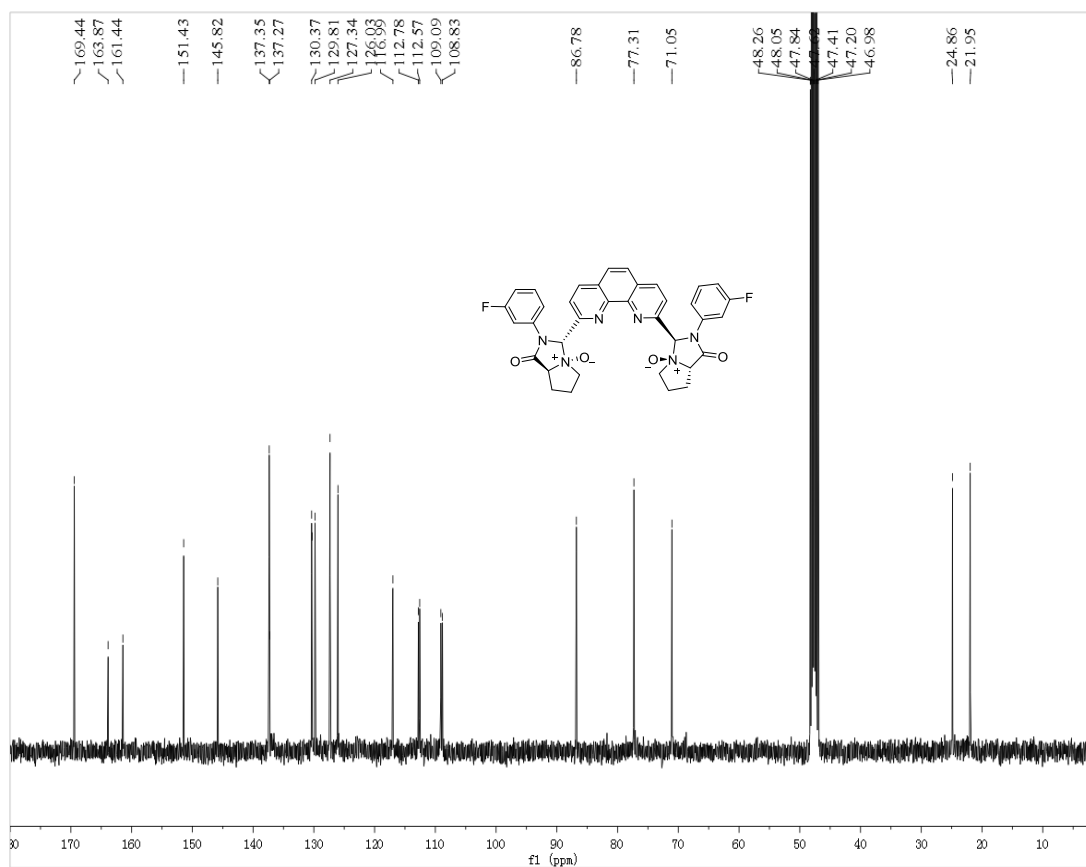

# $^1\text{H}$ and $^{13}\text{C}$ NMR of L1d

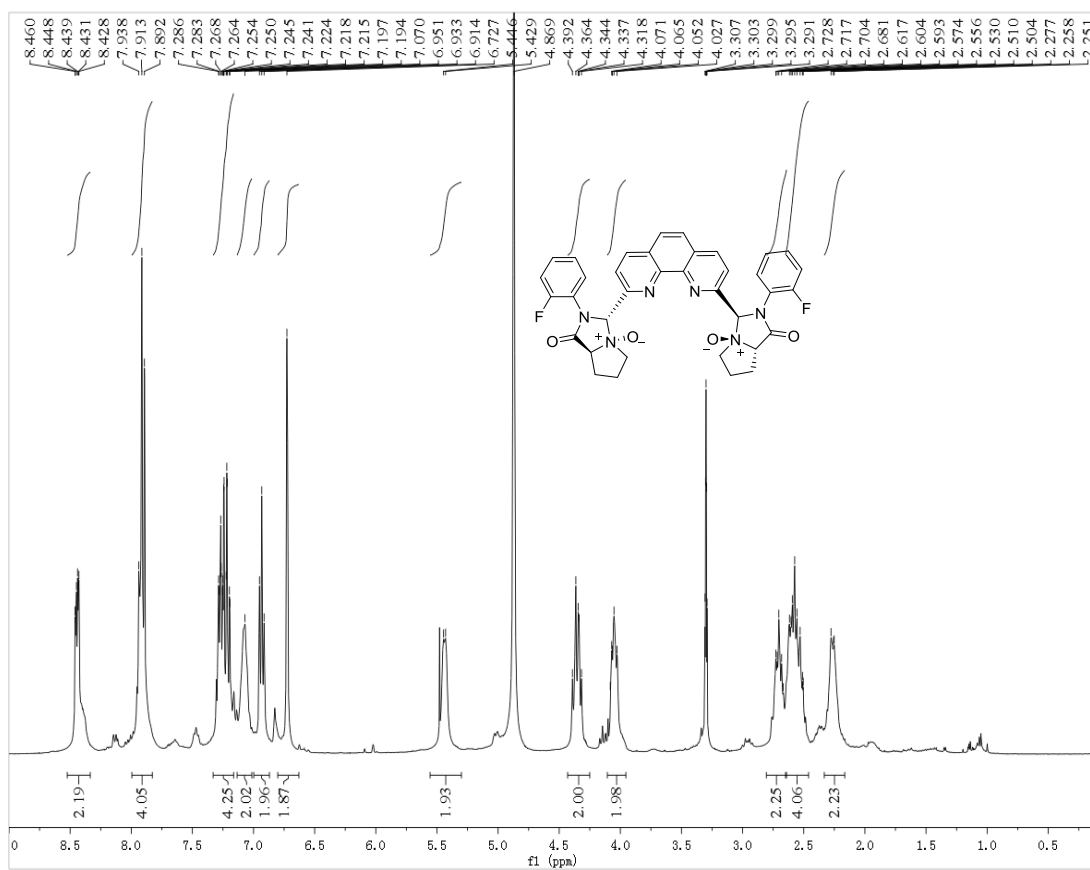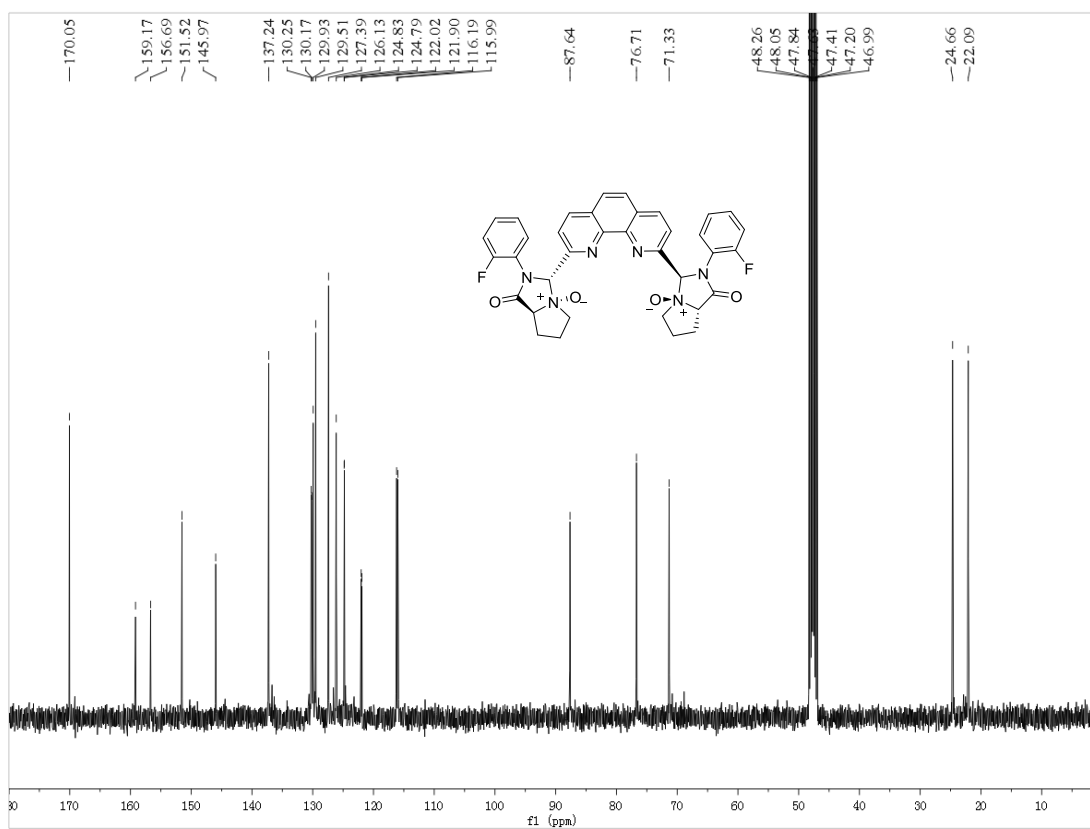

# $^1\text{H}$ and $^{13}\text{C}$ NMR of L1e

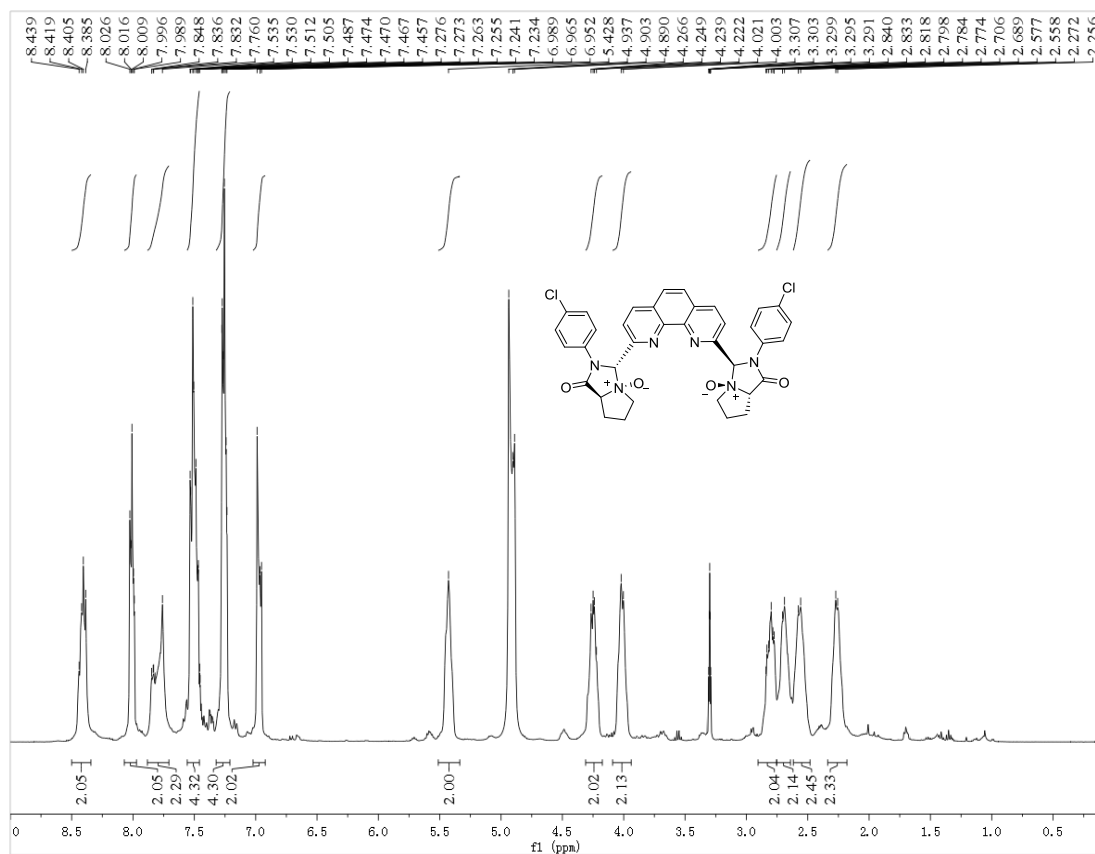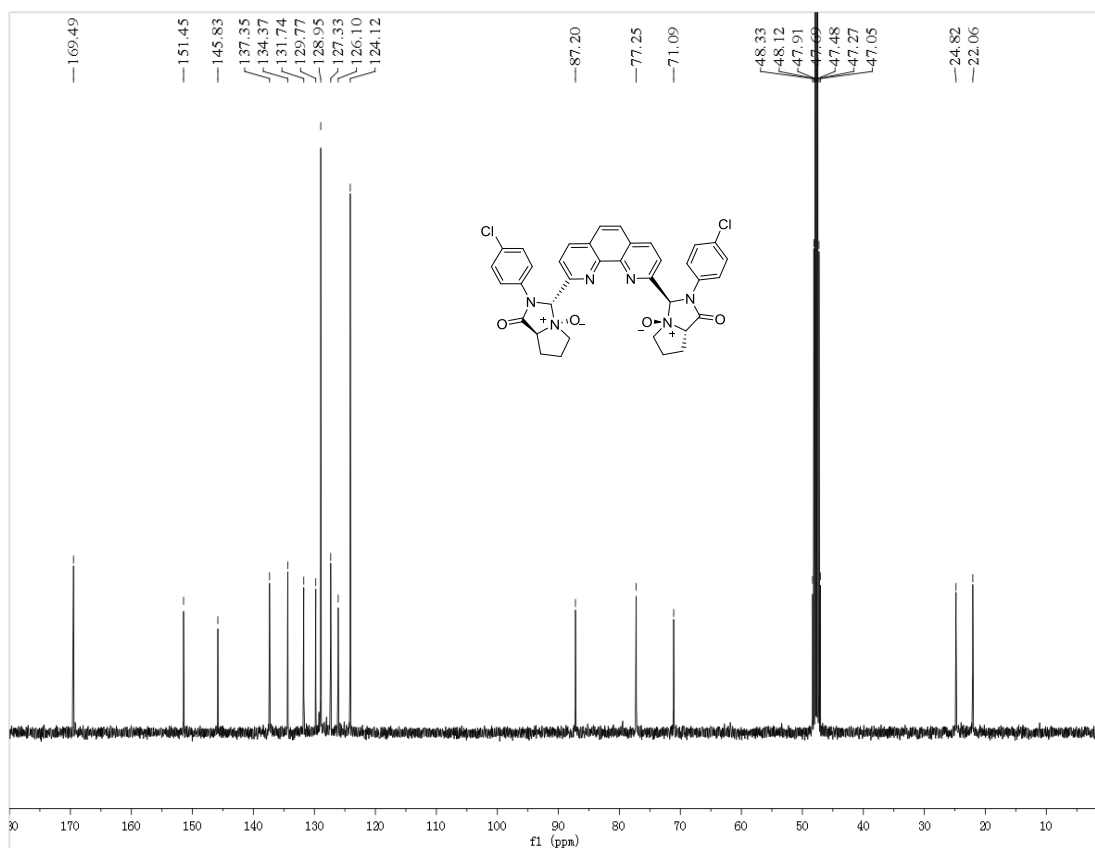

# $^1\text{H}$ and $^{13}\text{C}$ NMR of L1f

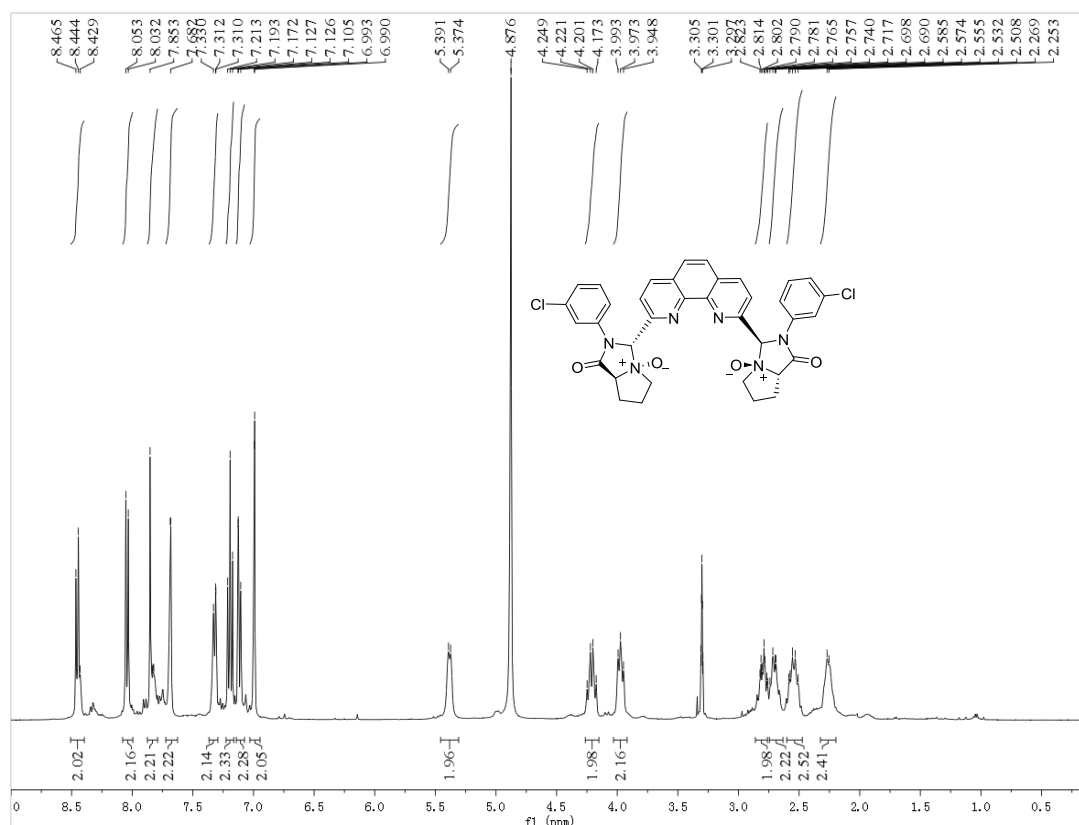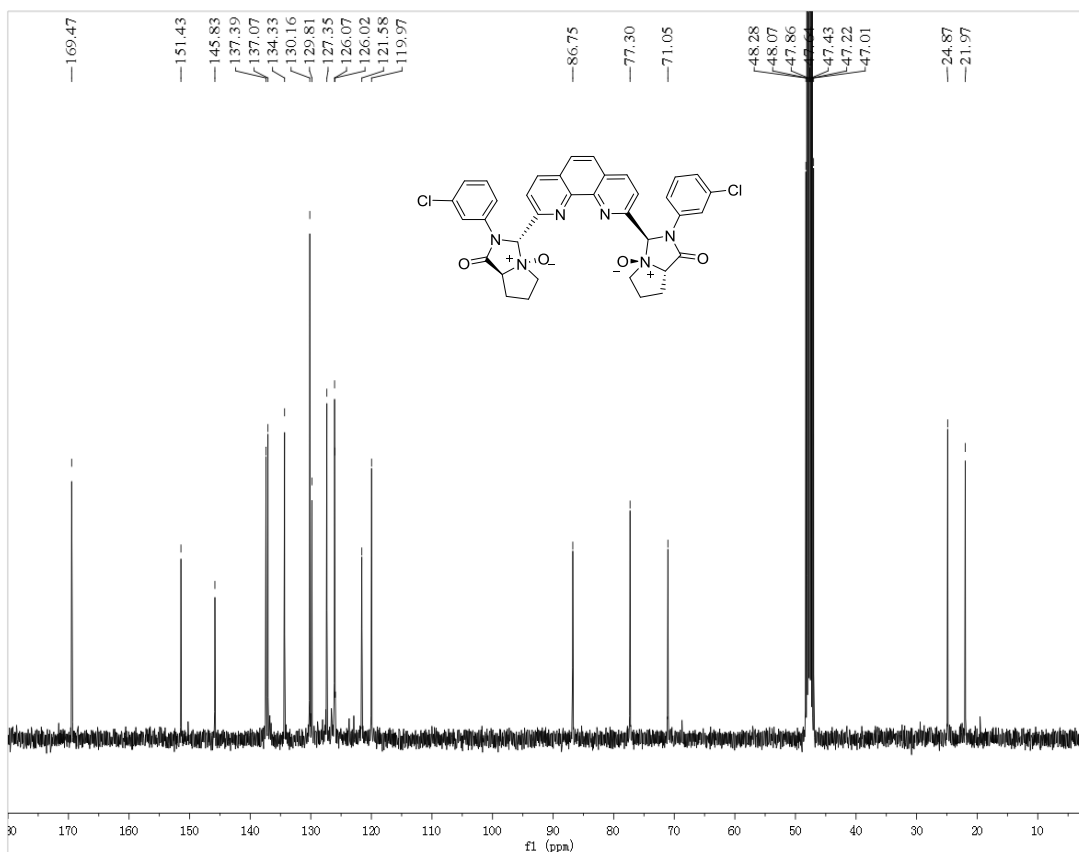

# <sup>1</sup>H and <sup>13</sup>C NMR of L1g

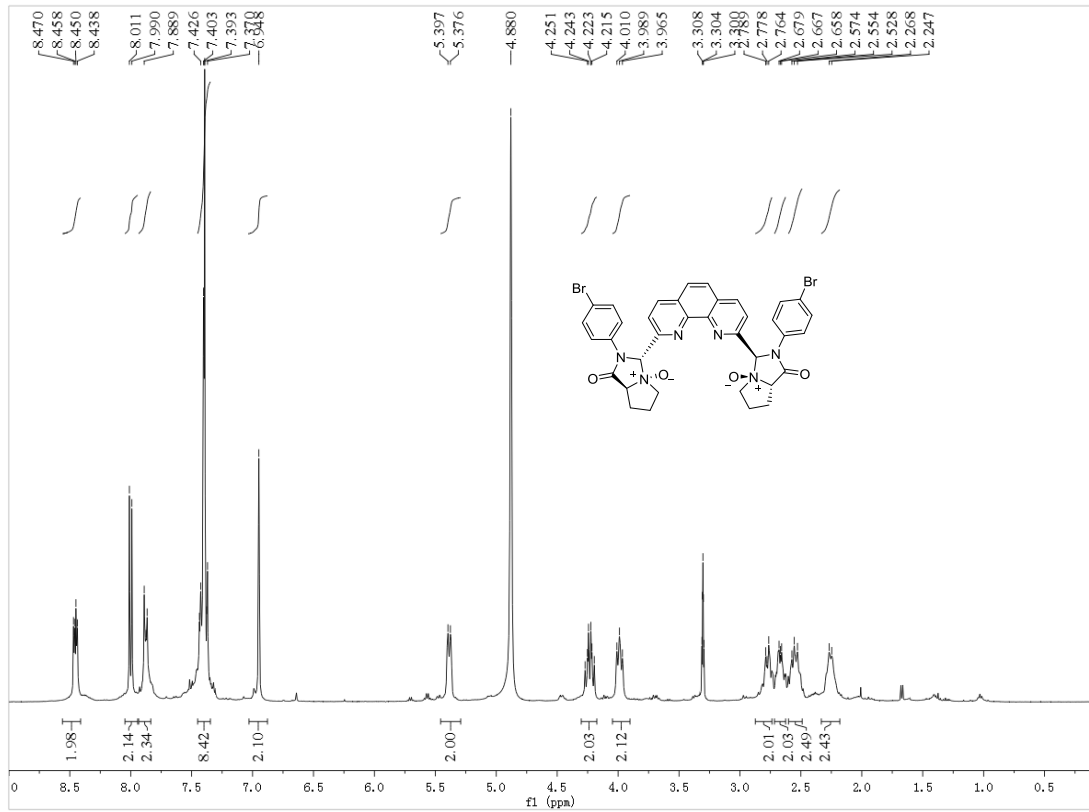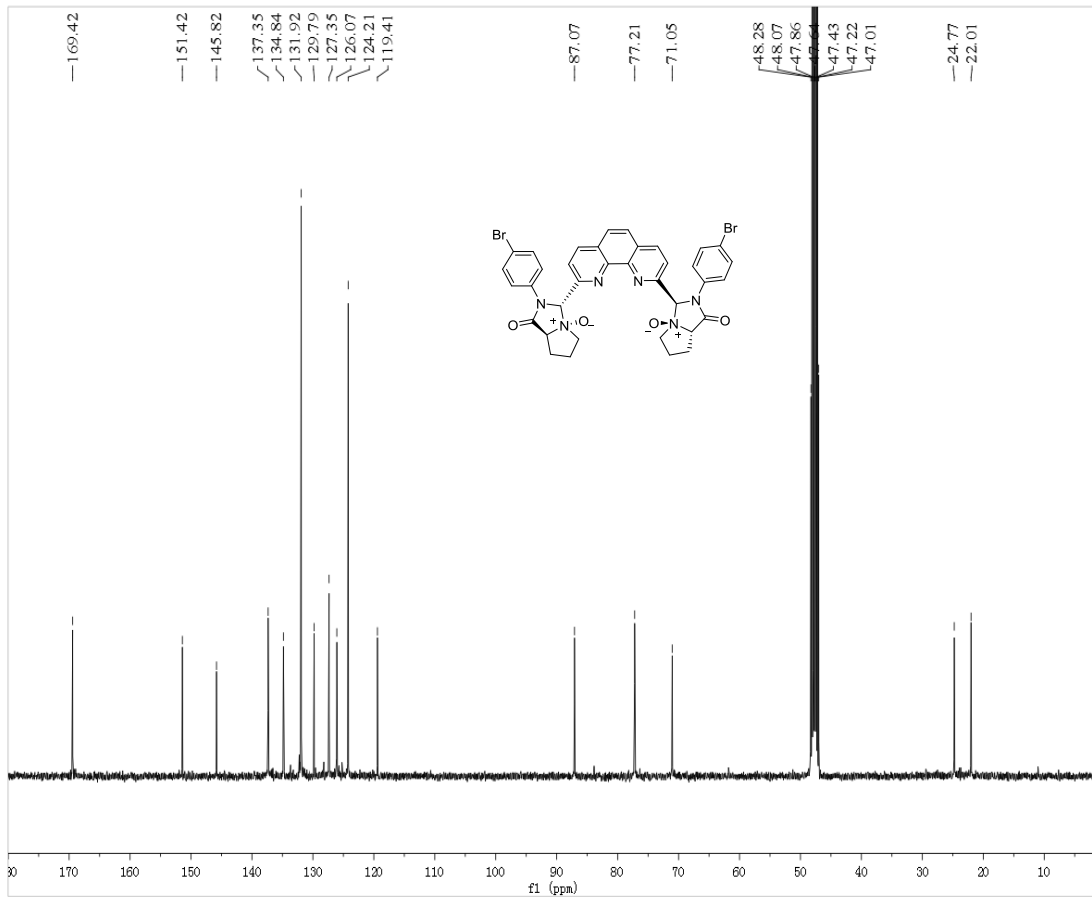

# $^1\text{H}$ and $^{13}\text{C}$ NMR of L1h

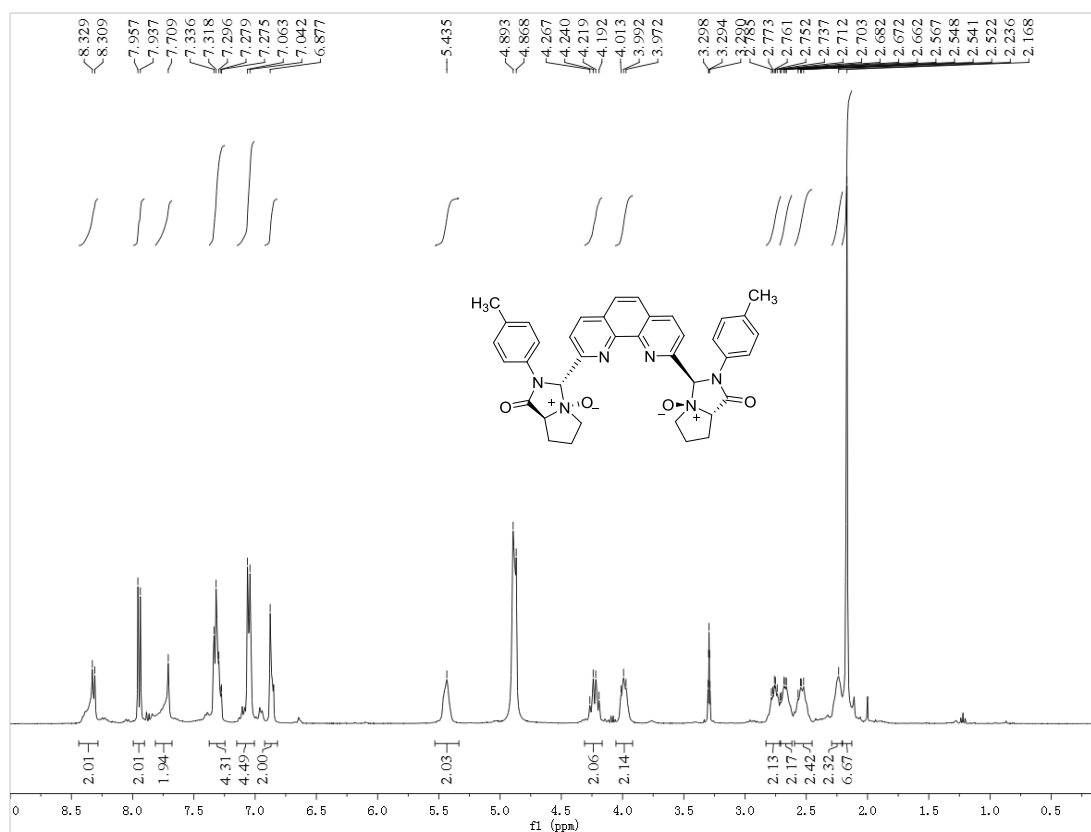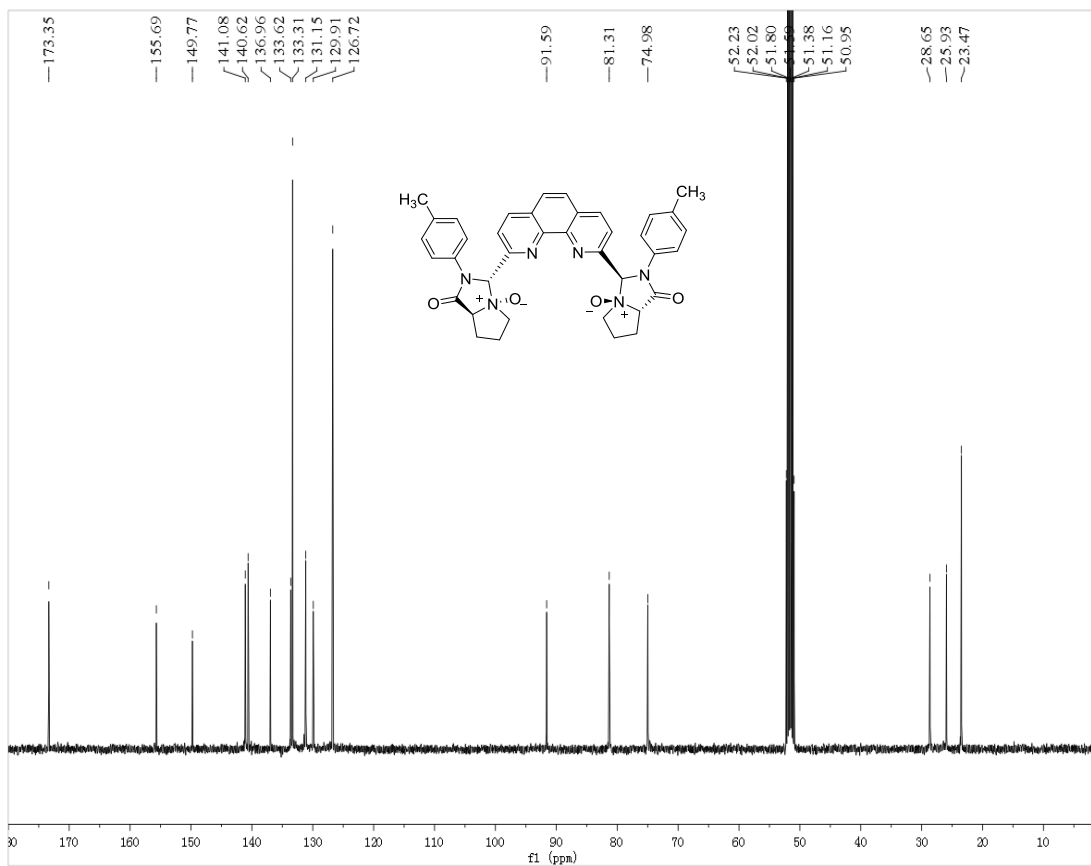

# <sup>1</sup>H and <sup>13</sup>C NMR of L1i

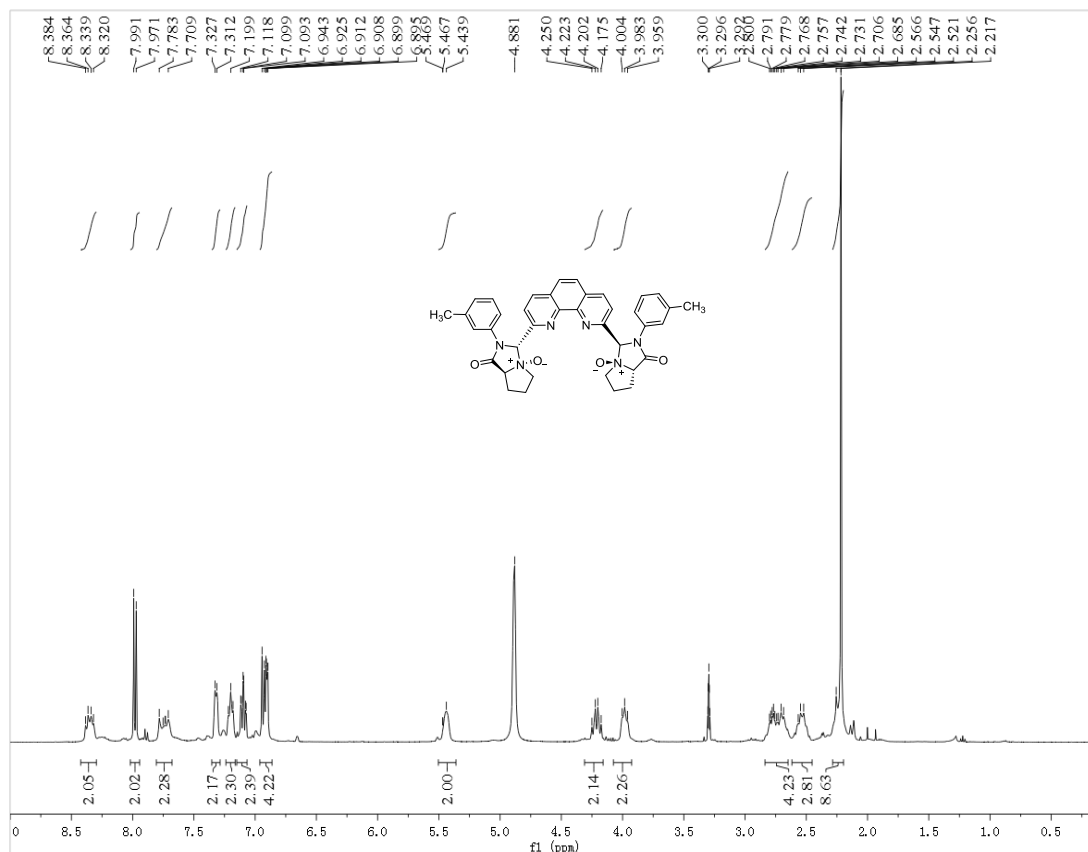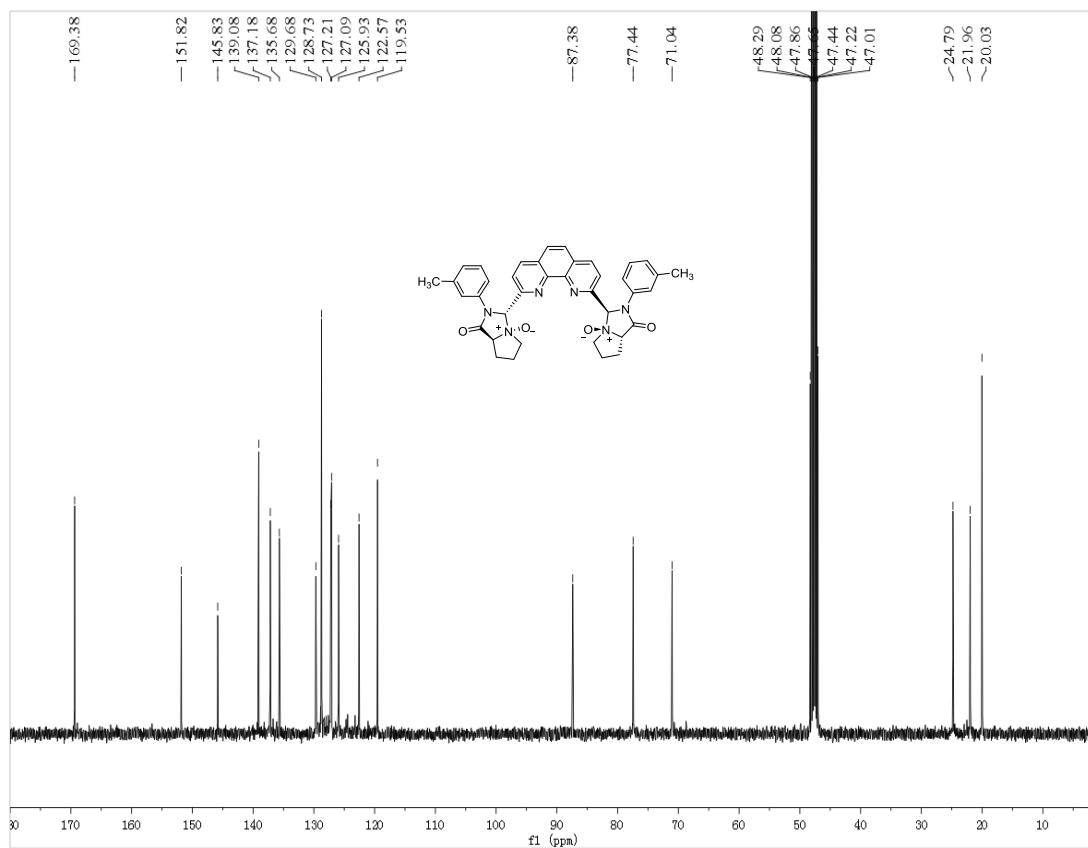

# $^1\text{H}$ and $^{13}\text{C}$ NMR of L1j

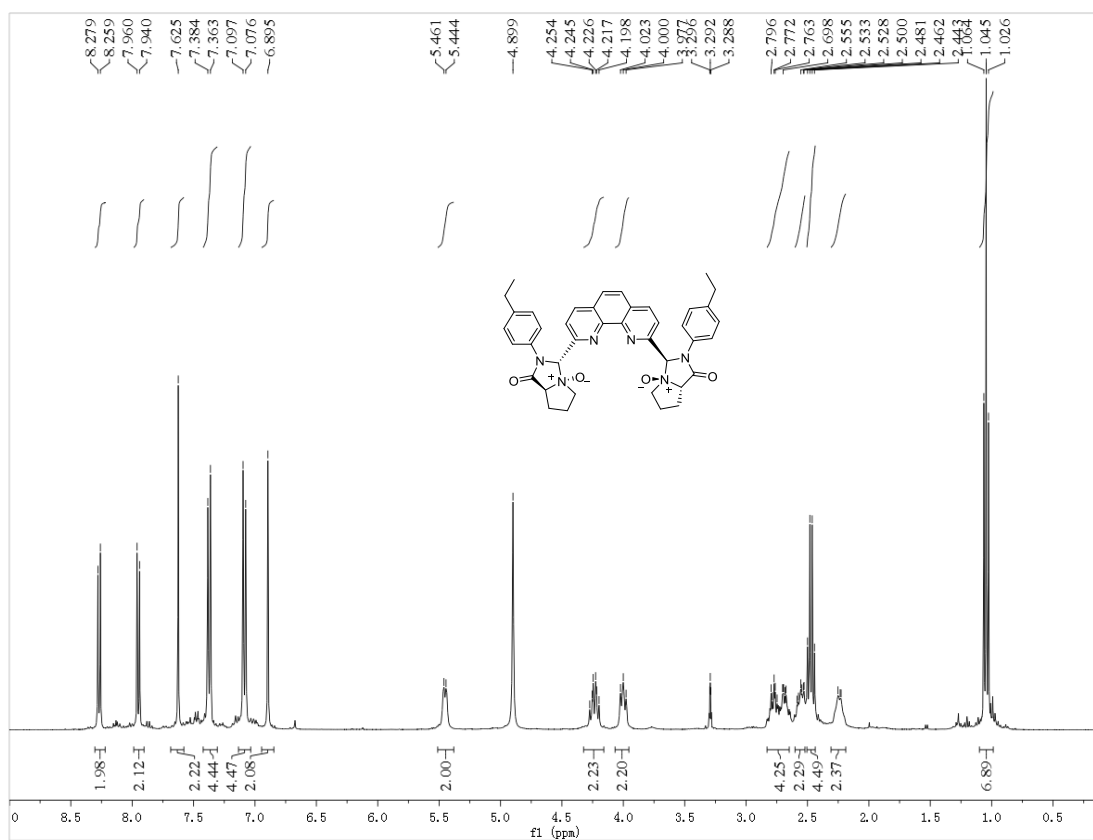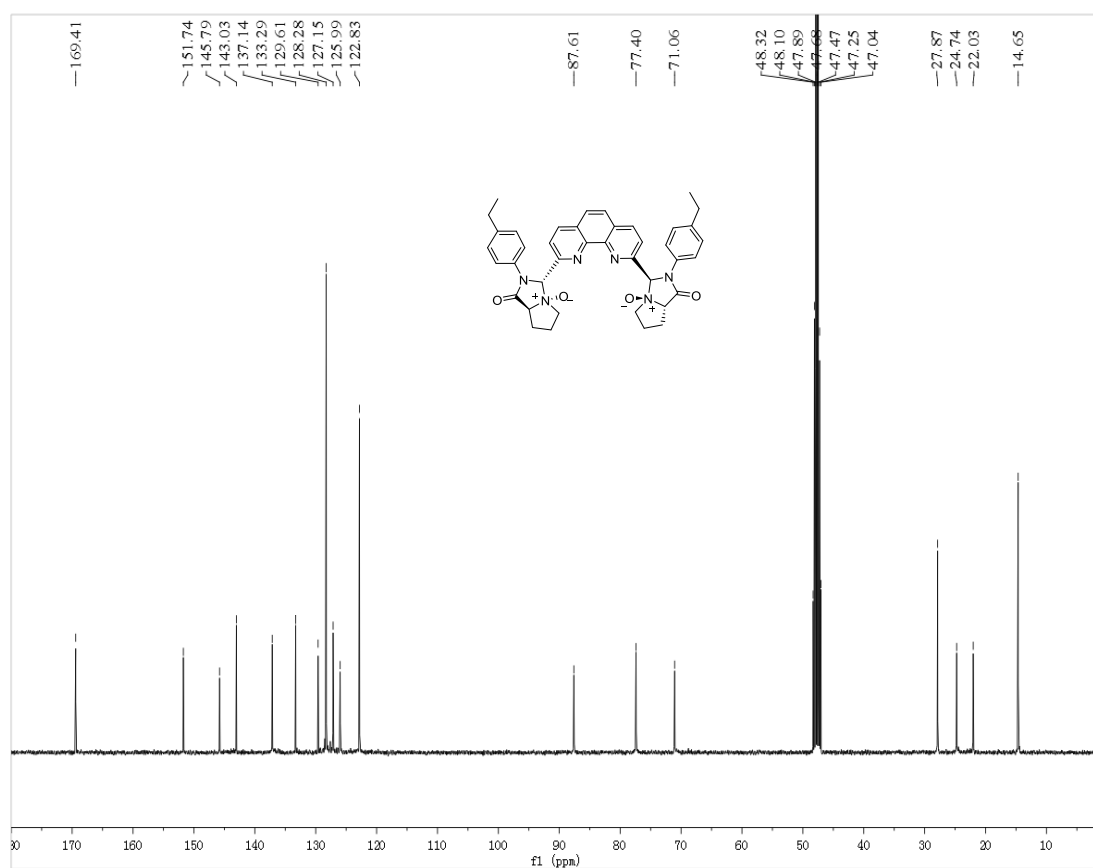



# <sup>1</sup>H and <sup>13</sup>C NMR of L1k

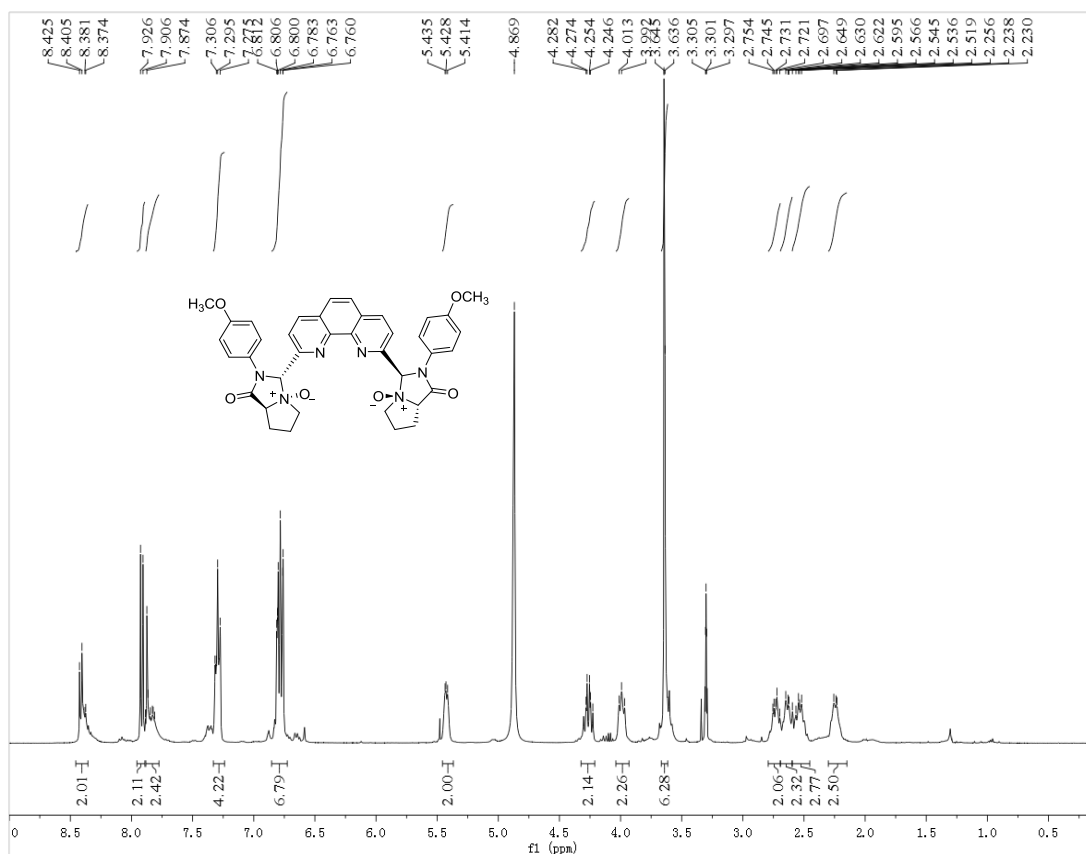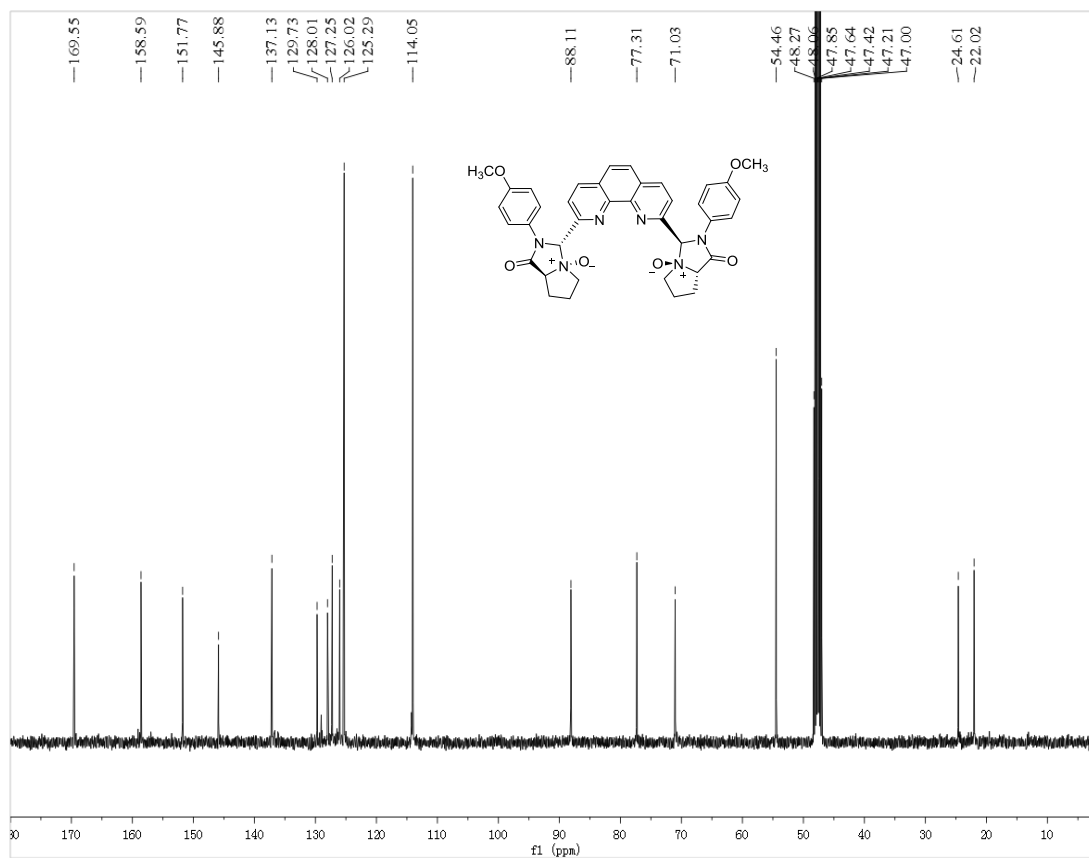

# <sup>1</sup>H and <sup>13</sup>C NMR of L11

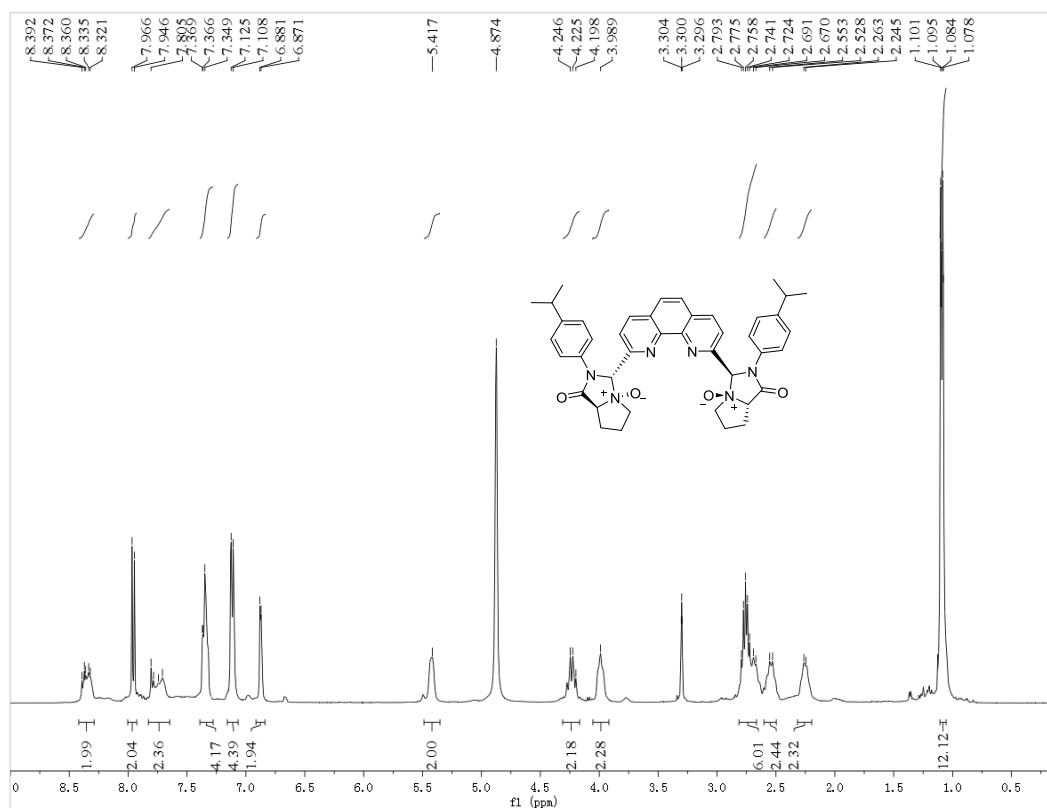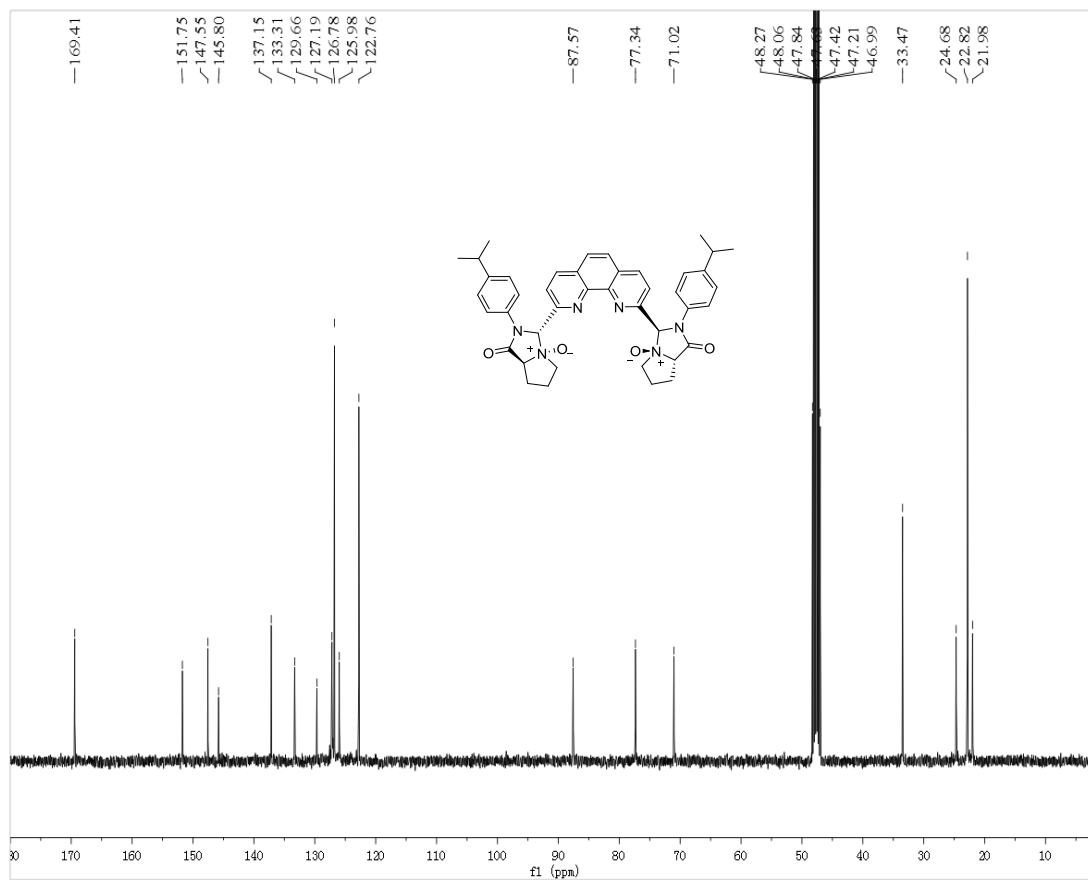

# $^1\text{H}$ and $^{13}\text{C}$ NMR of L2a

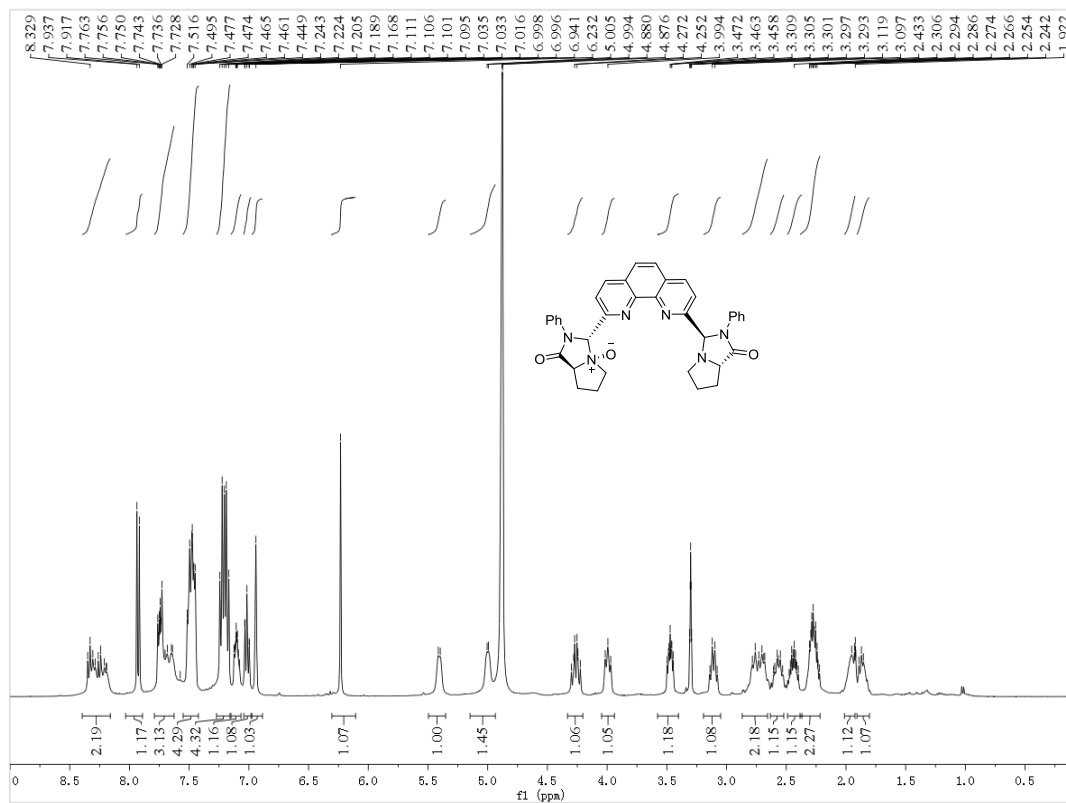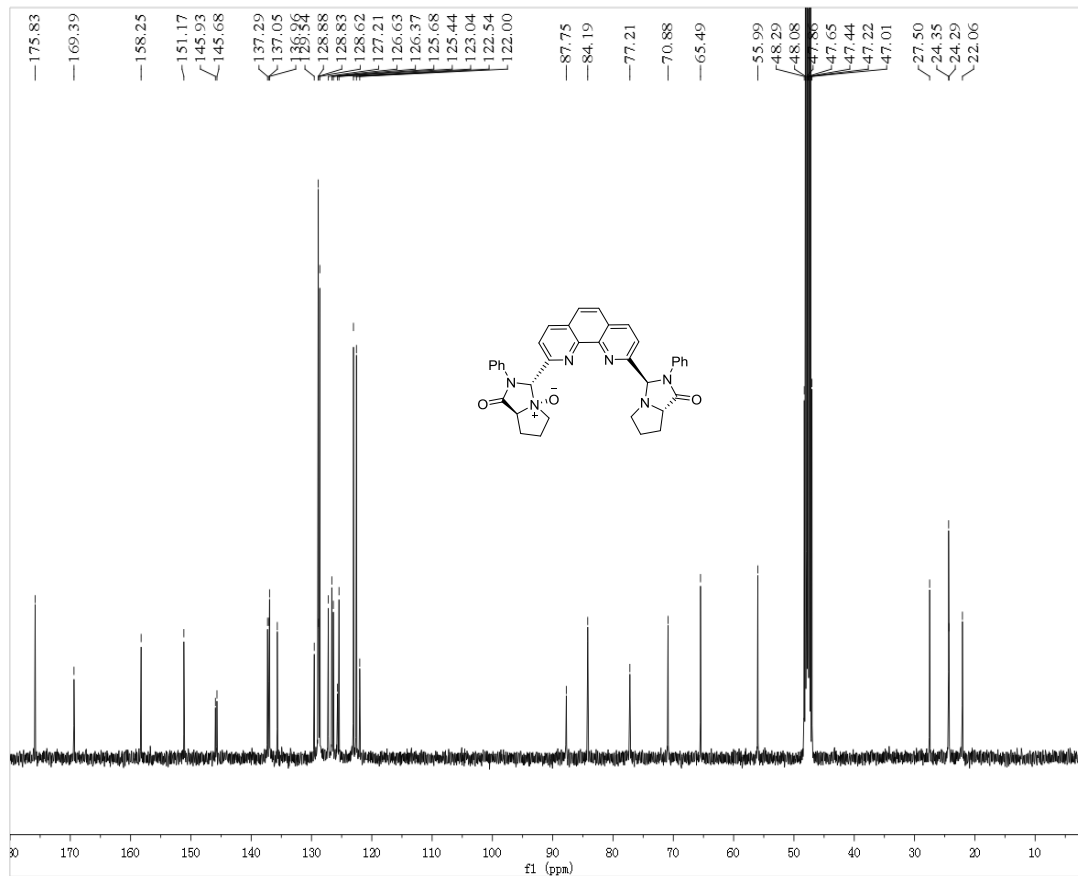

# <sup>1</sup>H and <sup>13</sup>C NMR of L6a

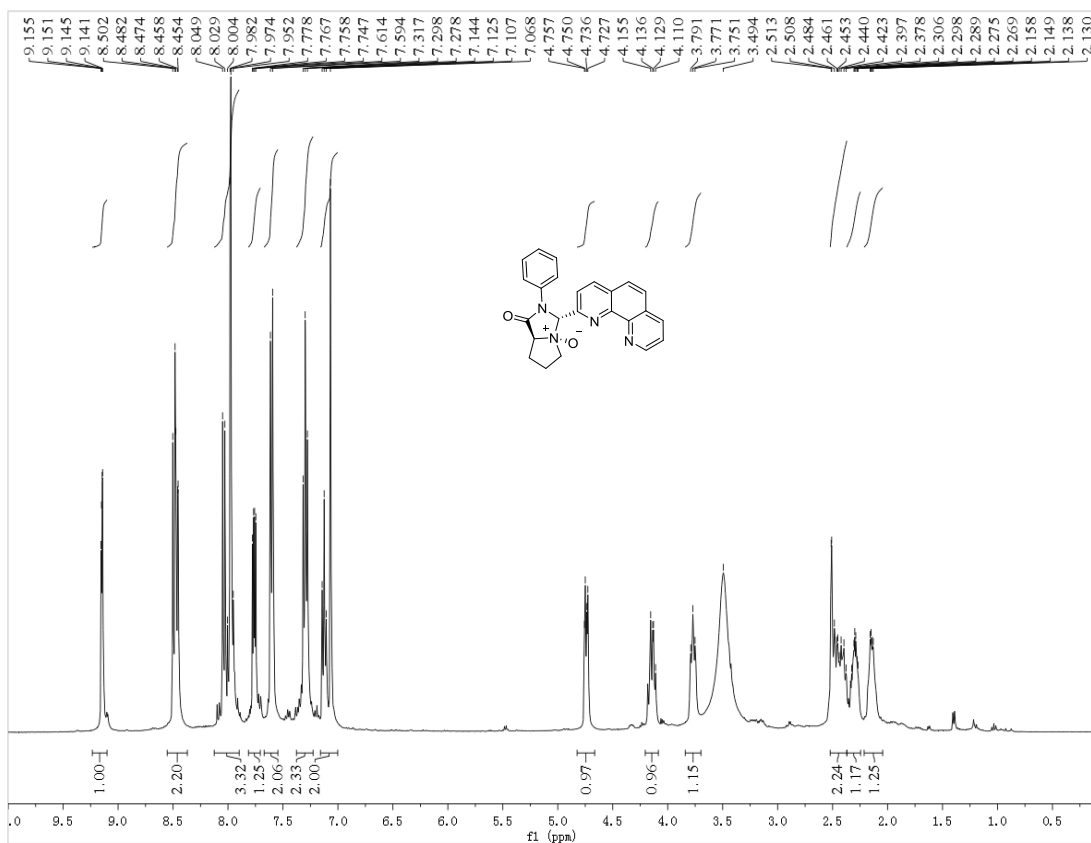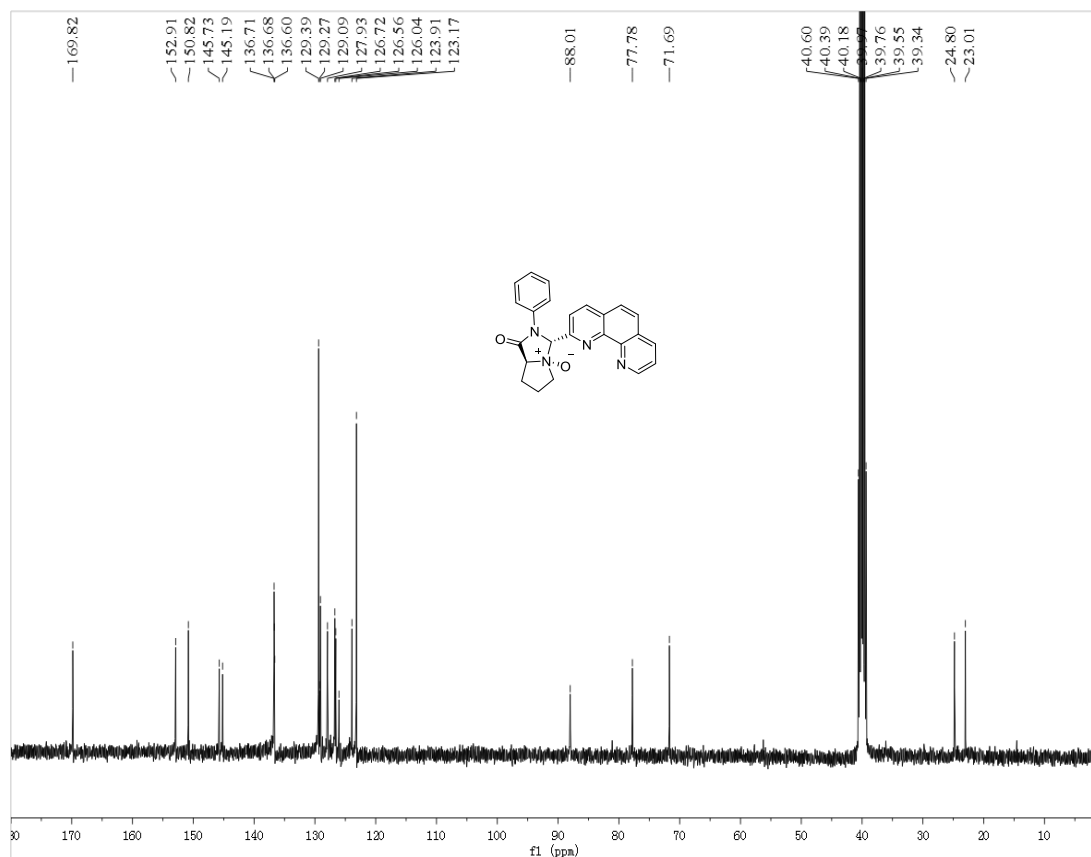

# $^1\text{H}$ and $^{13}\text{C}$ NMR of 6a

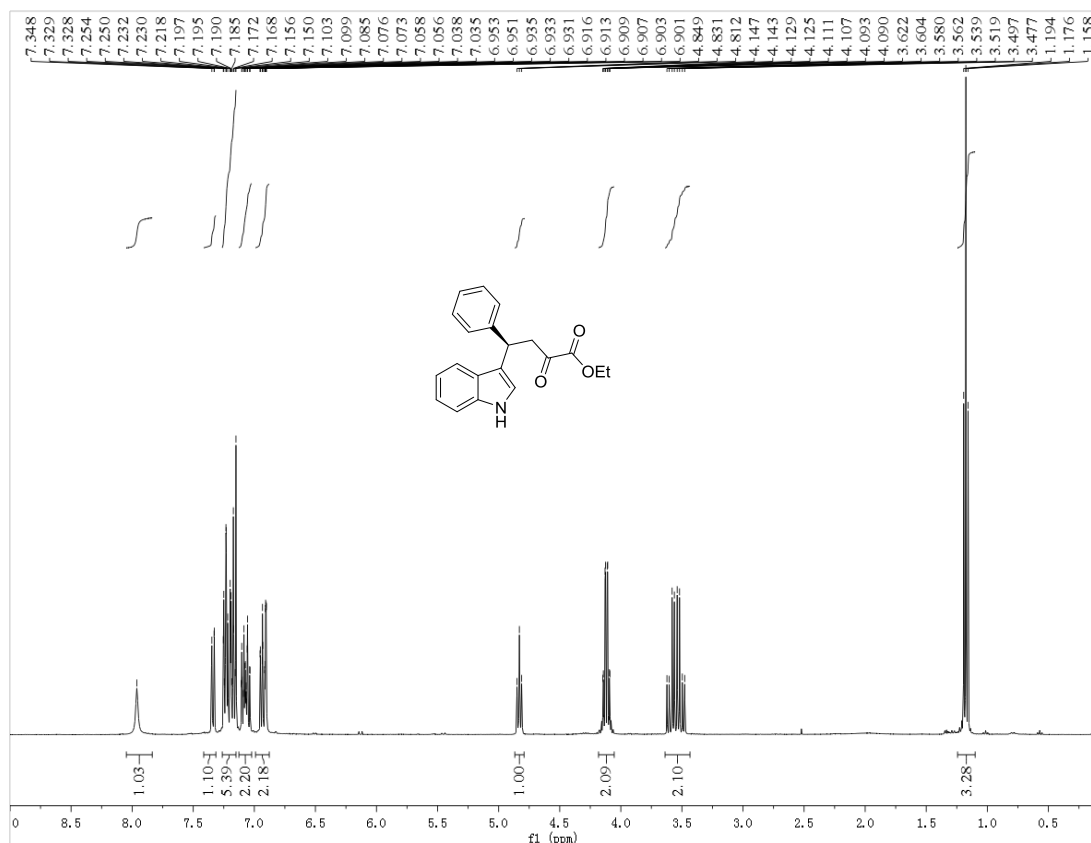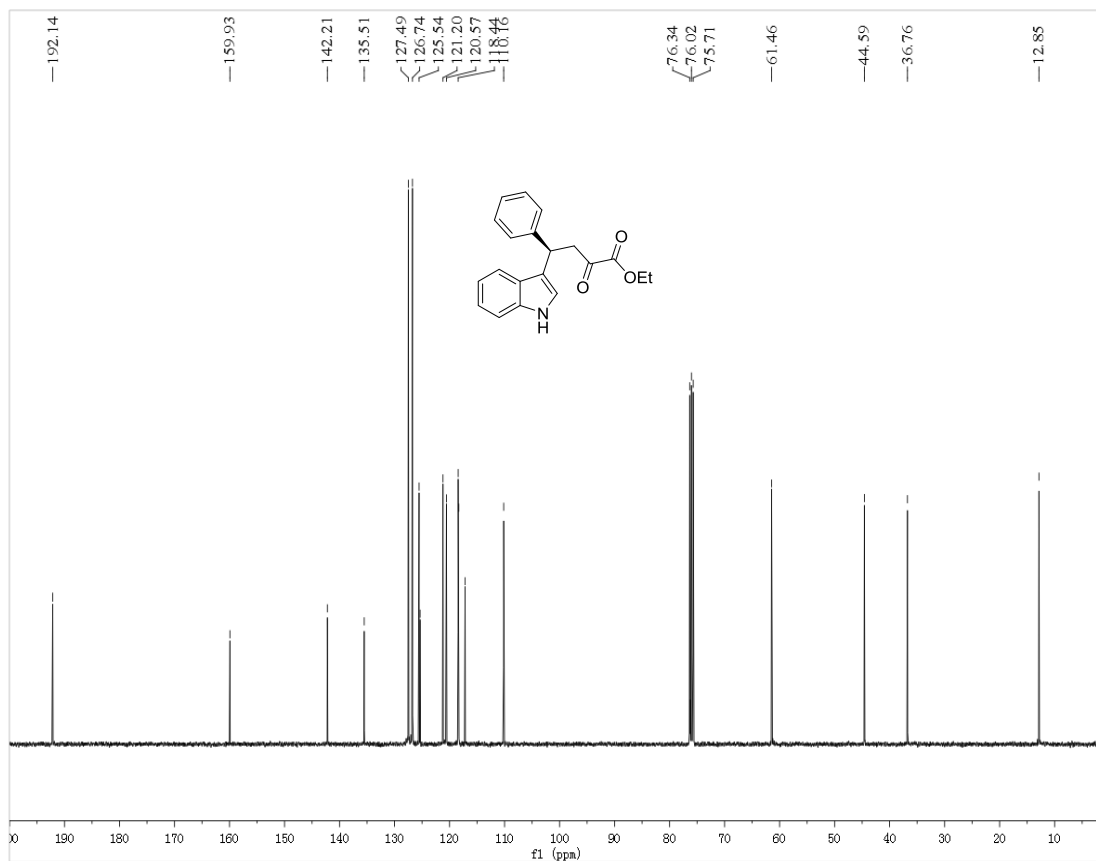

## HPLC of 6a

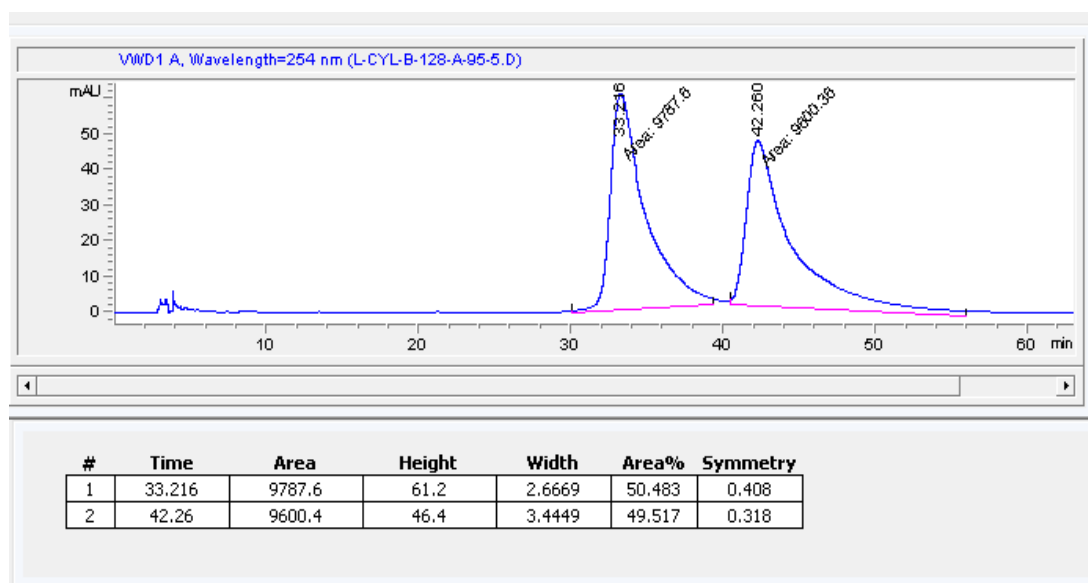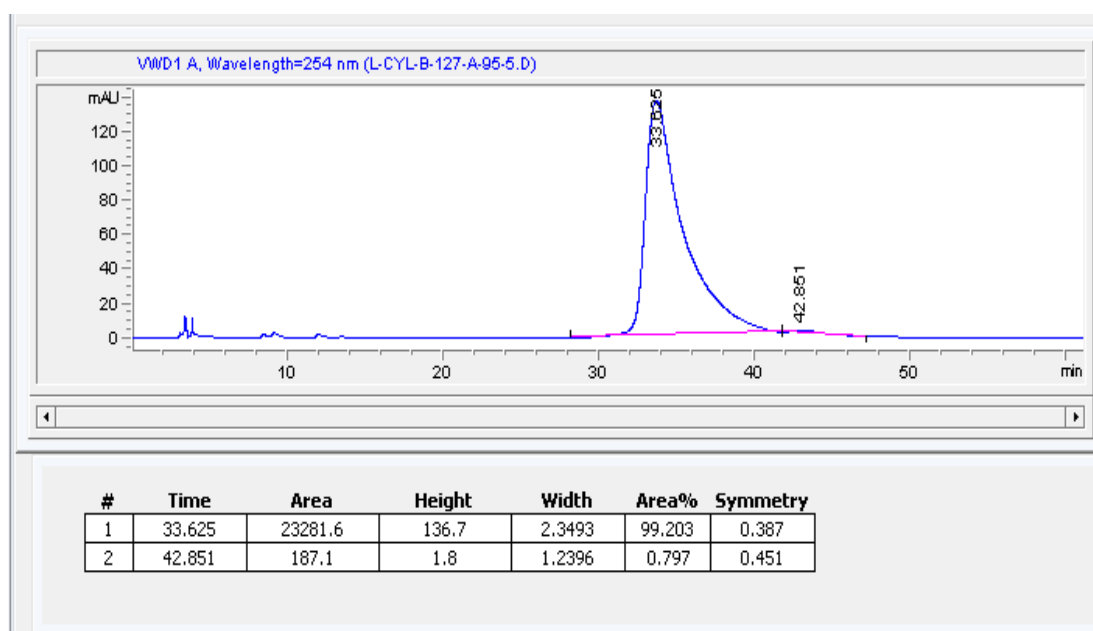

# <sup>1</sup>H and <sup>13</sup>C NMR of 6b

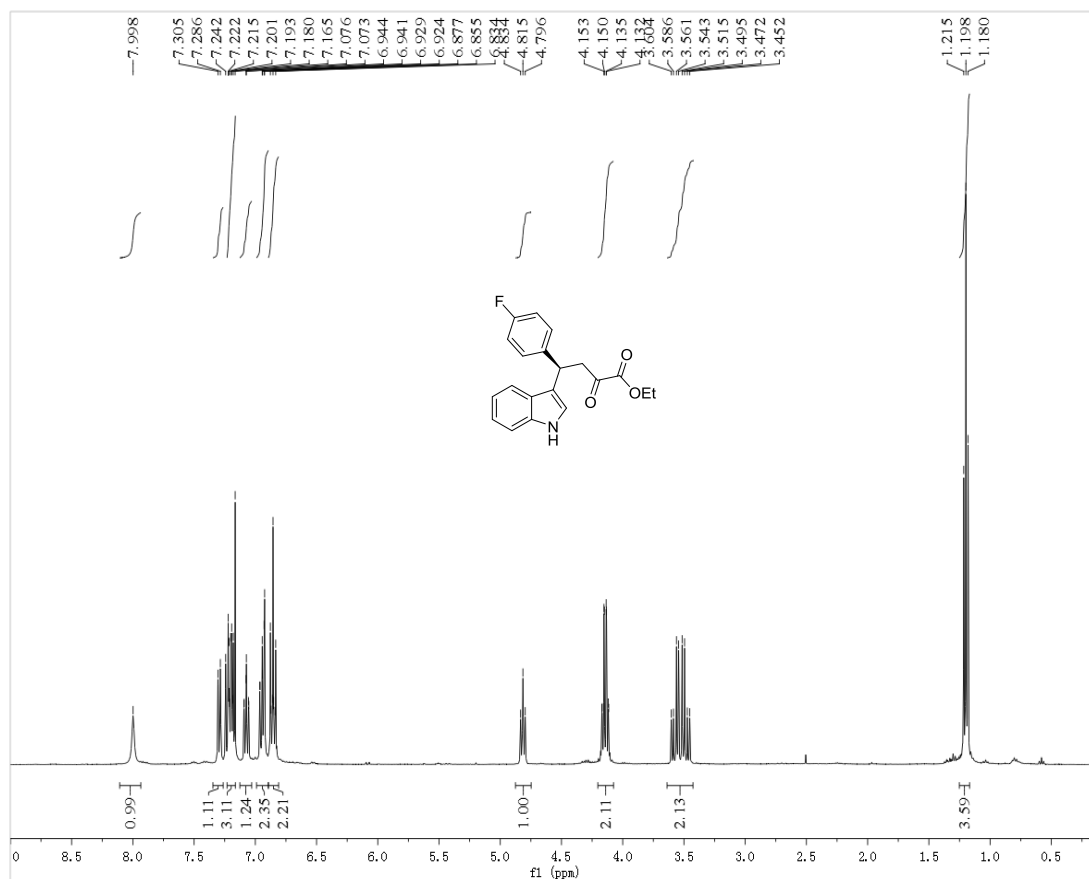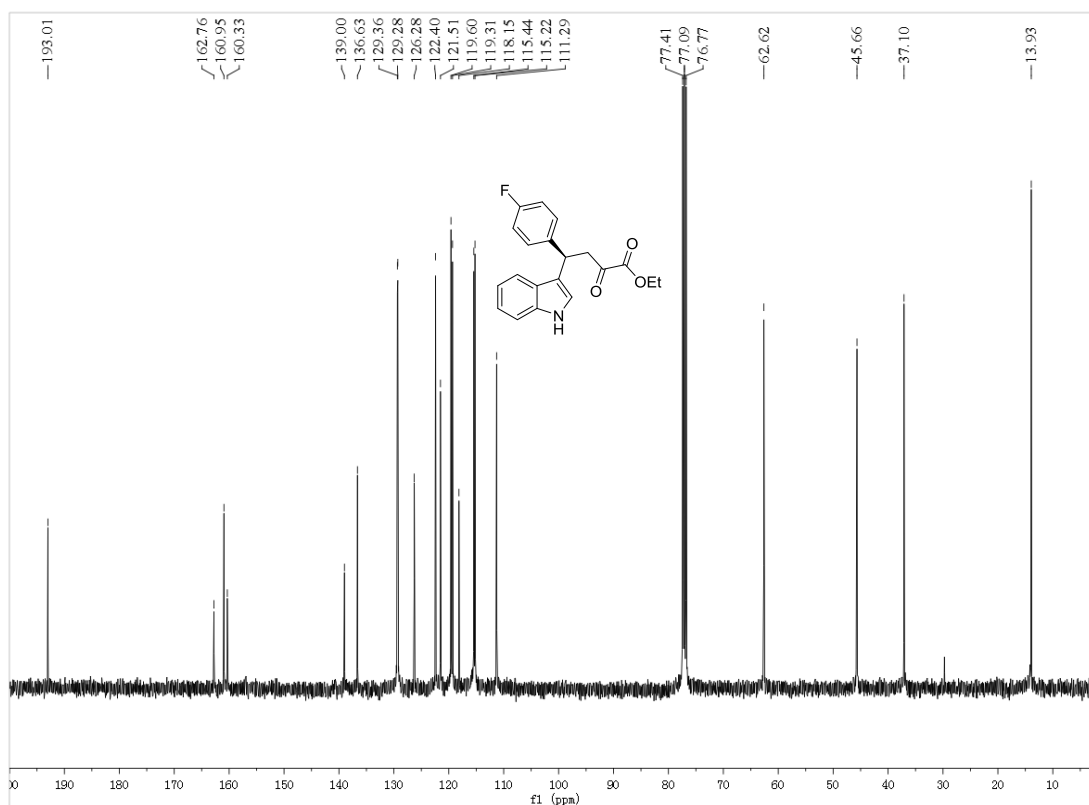

## HPLC of 6b

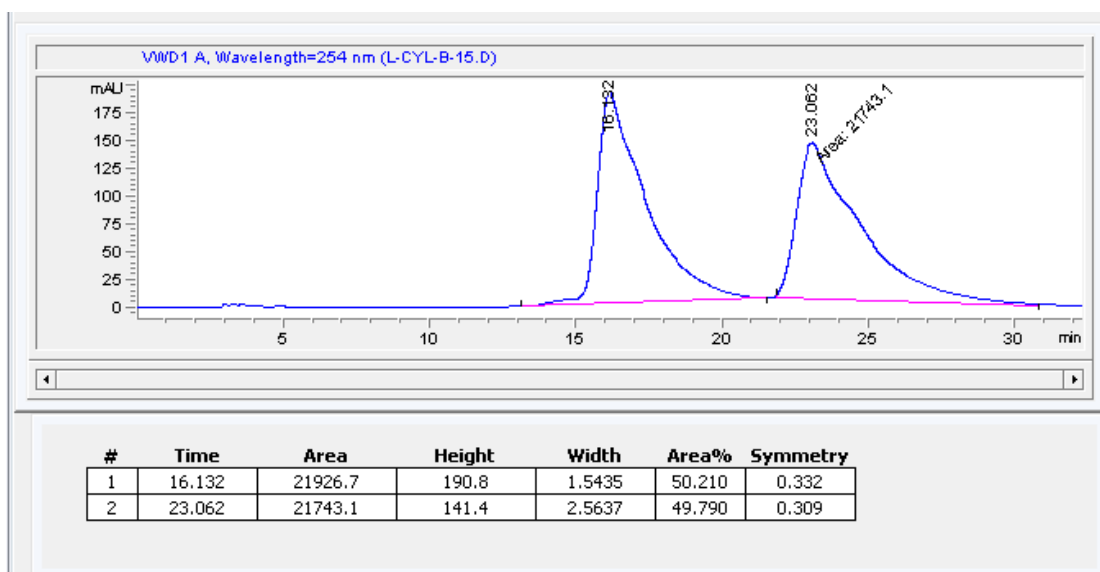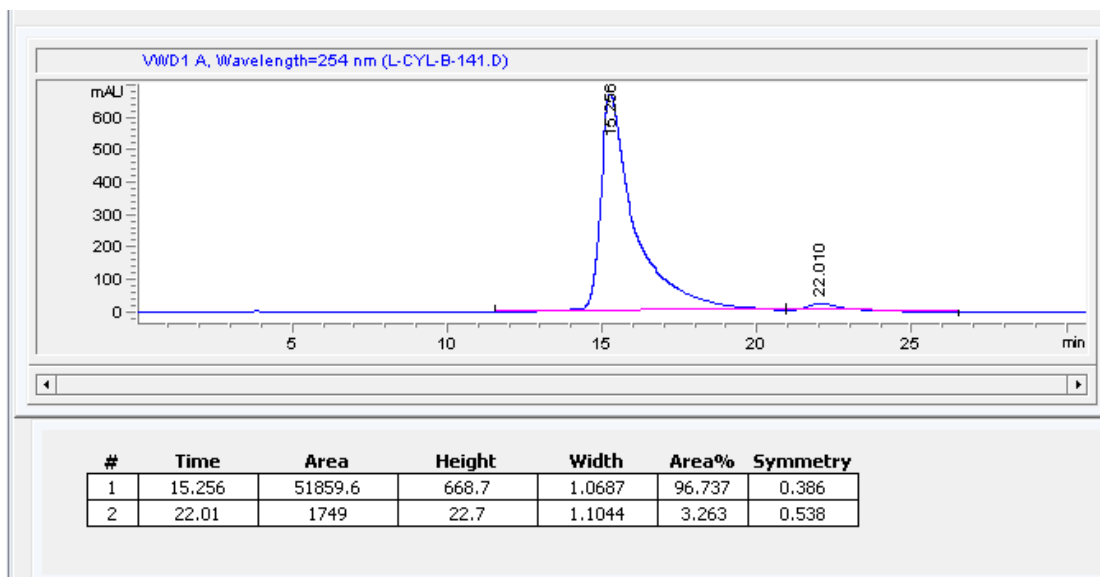



# $^1\text{H}$ and $^{13}\text{C}$ NMR of 6c

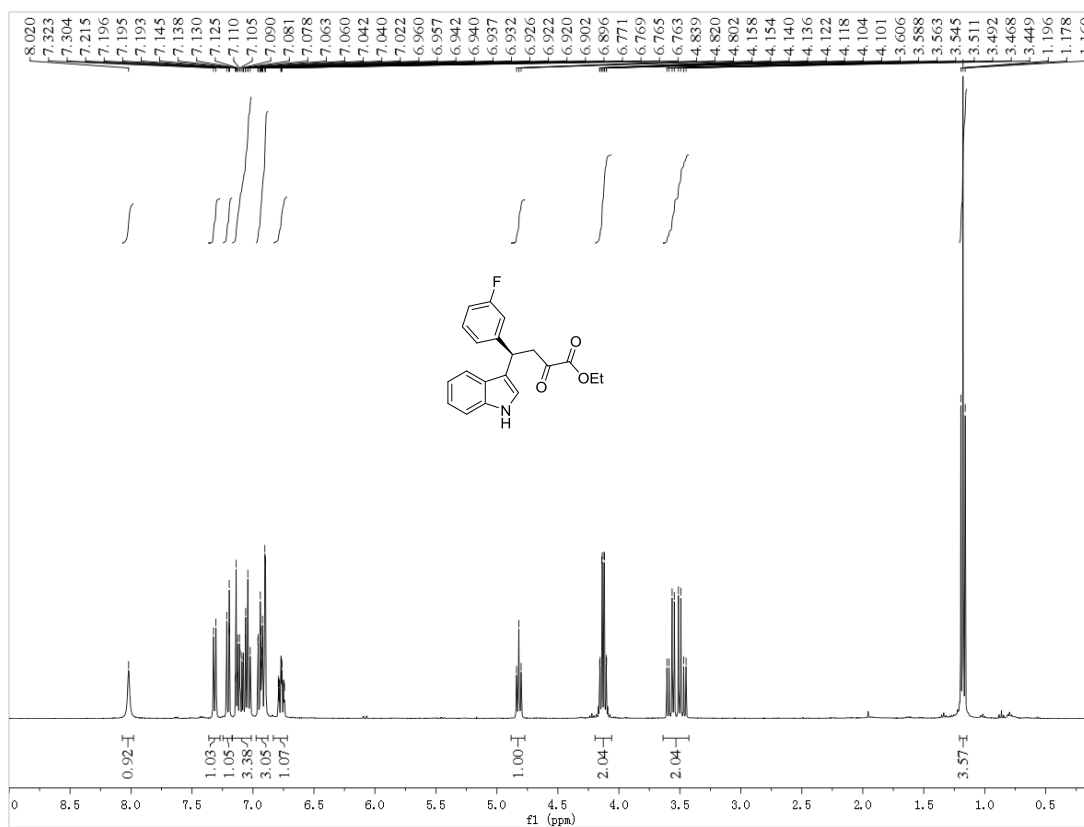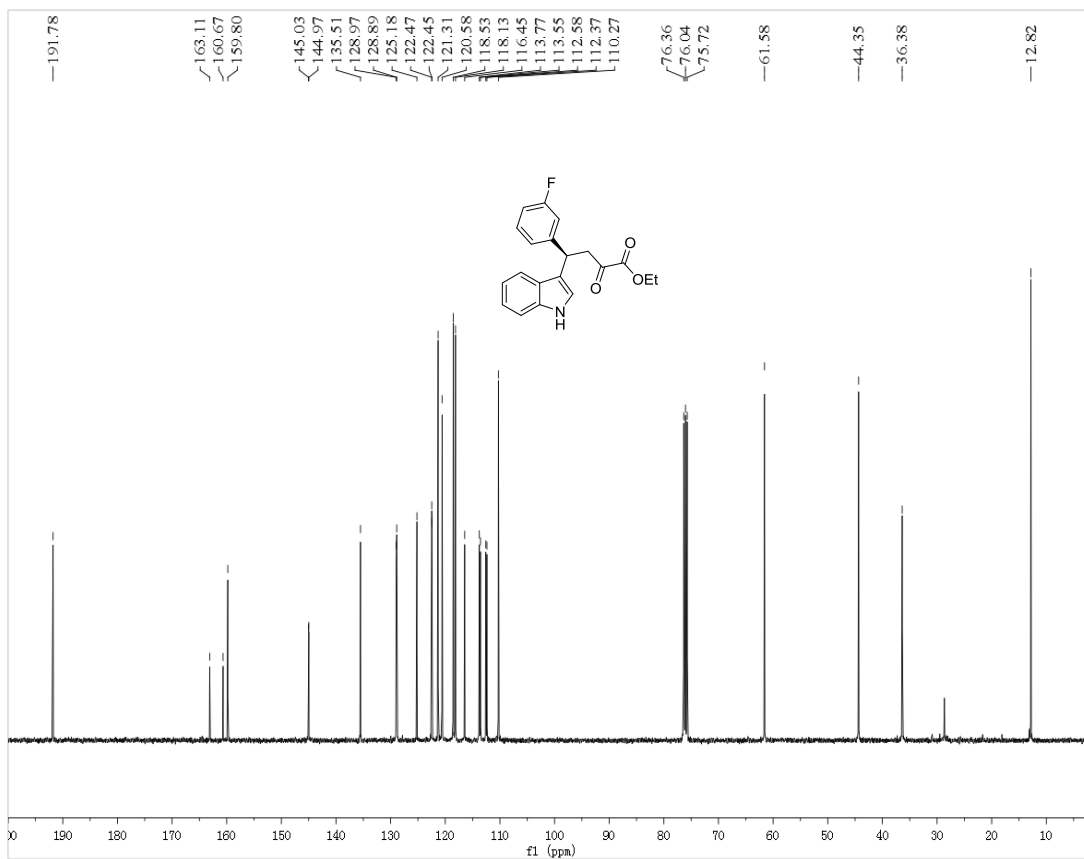

## HPLC of 6c

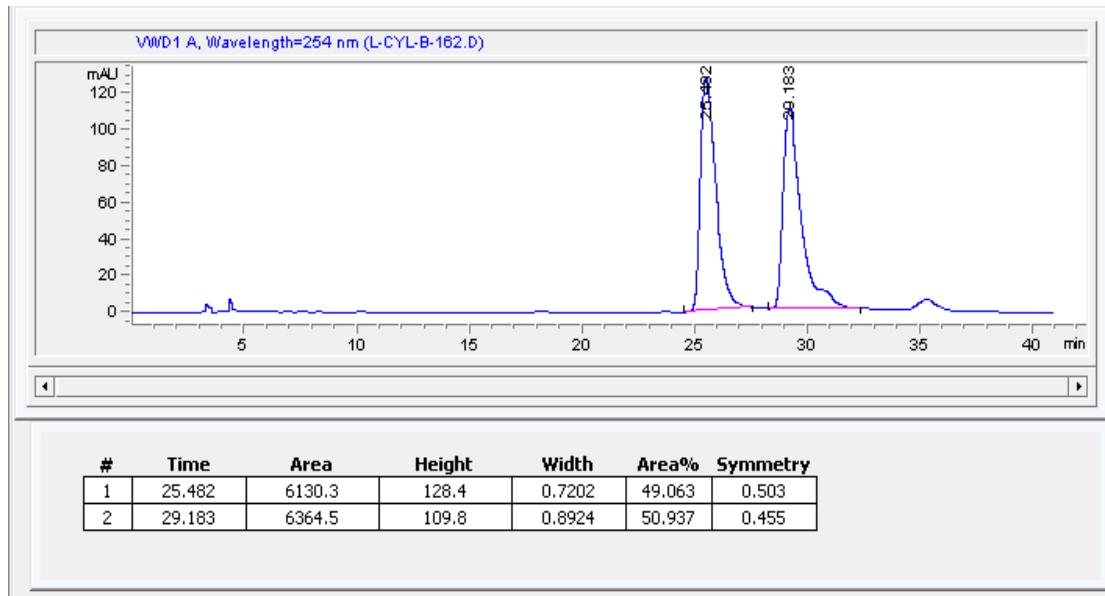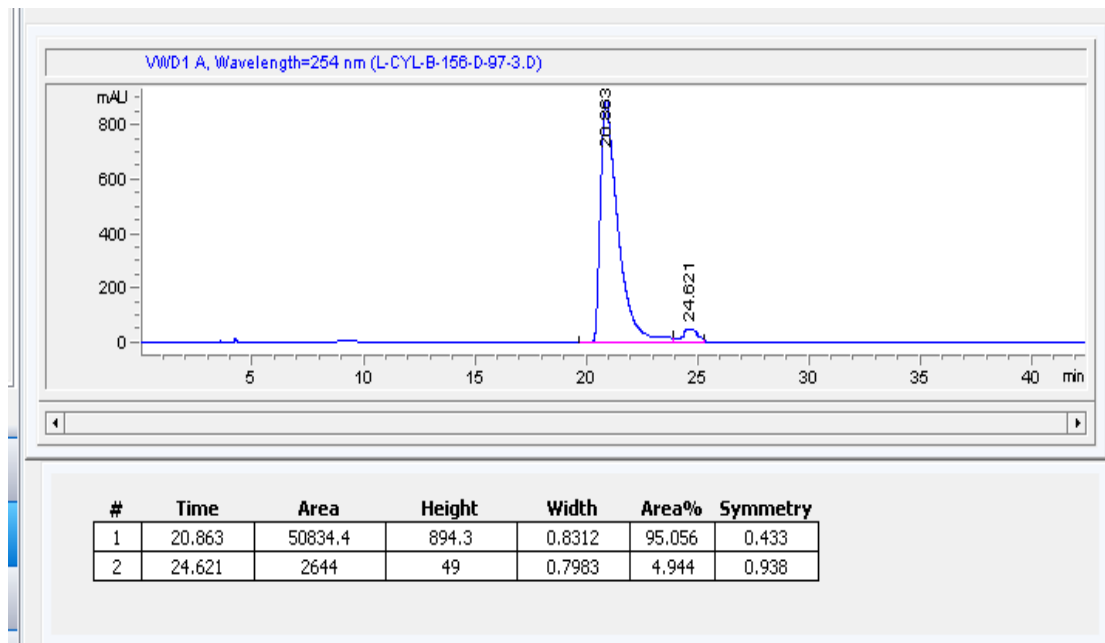

**<sup>1</sup>H and <sup>13</sup>C NMR of 6d**

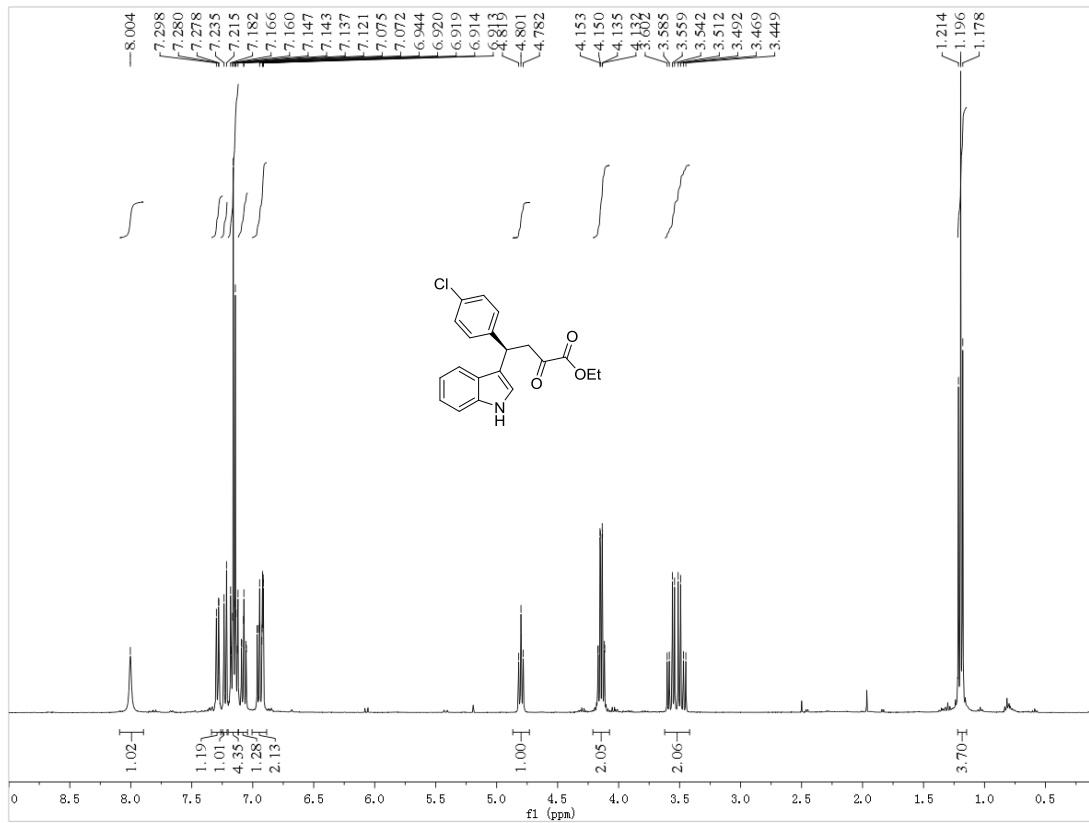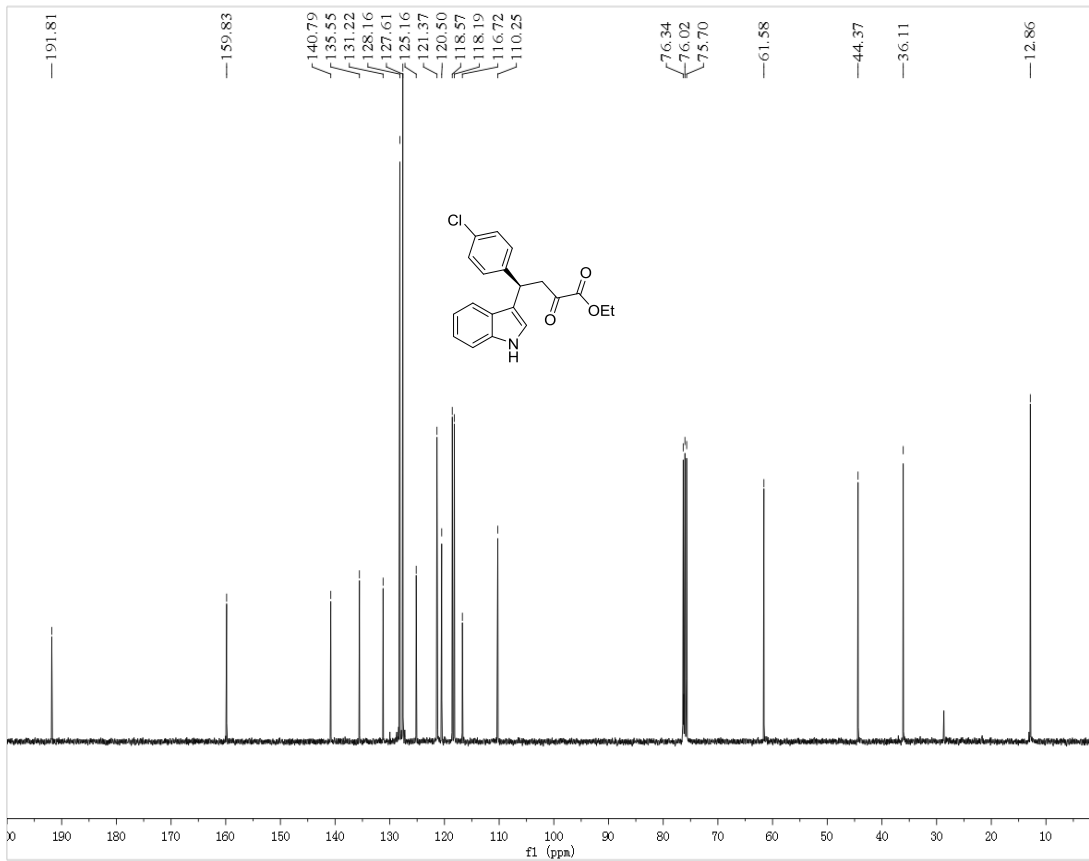

### HPLC of 6d

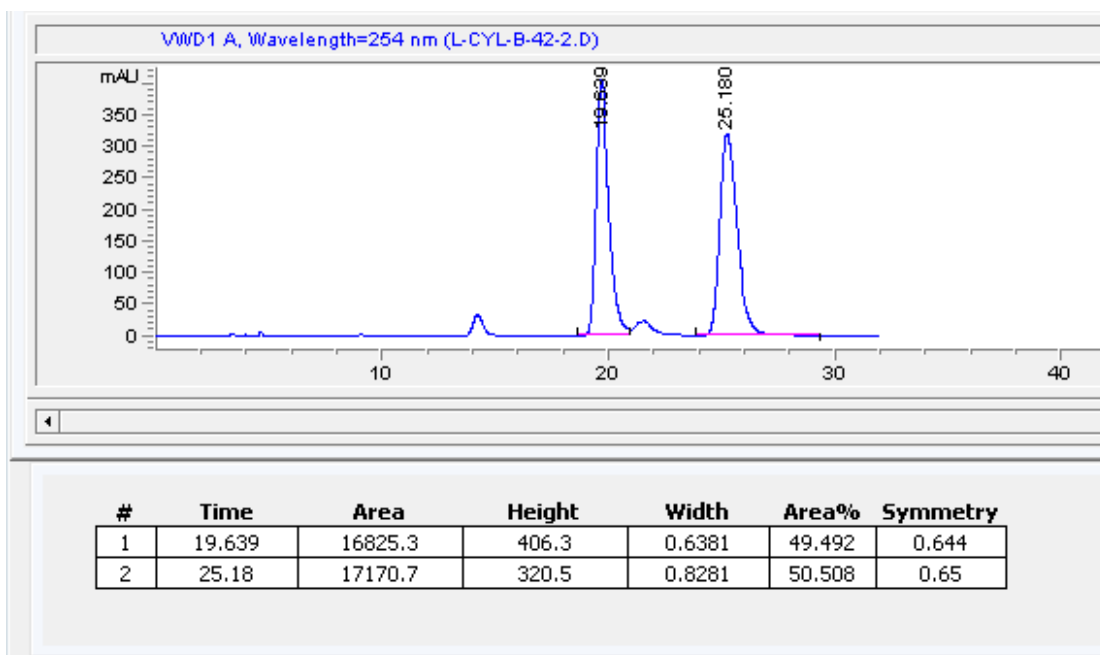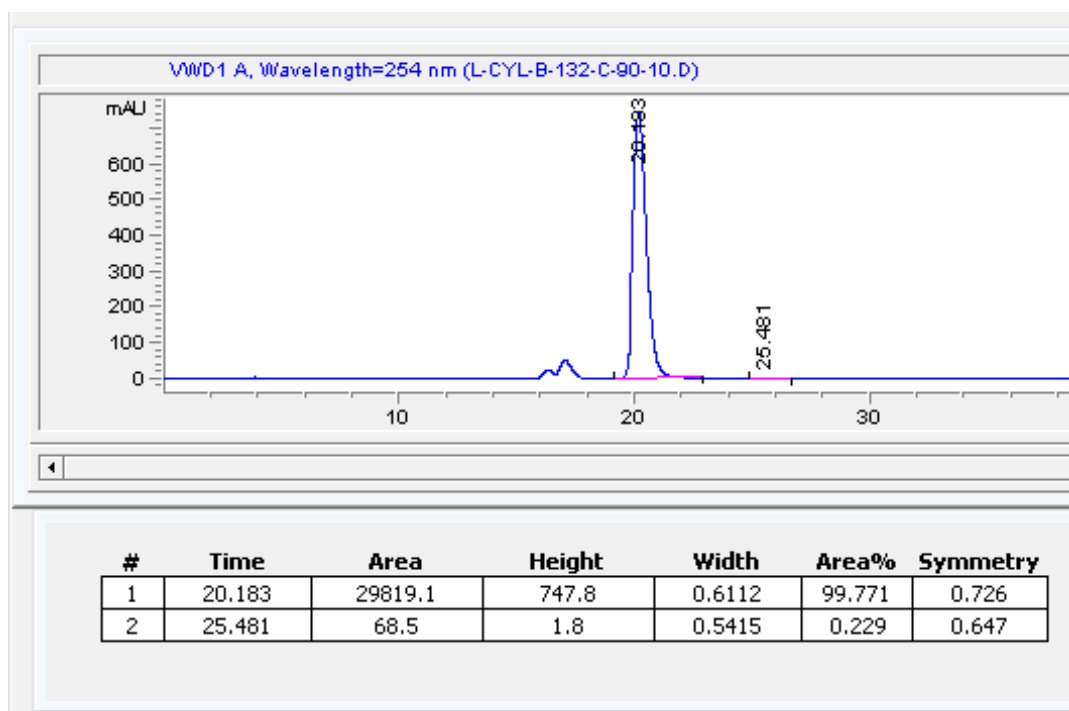

# <sup>1</sup>H and <sup>13</sup>C NMR of 6e

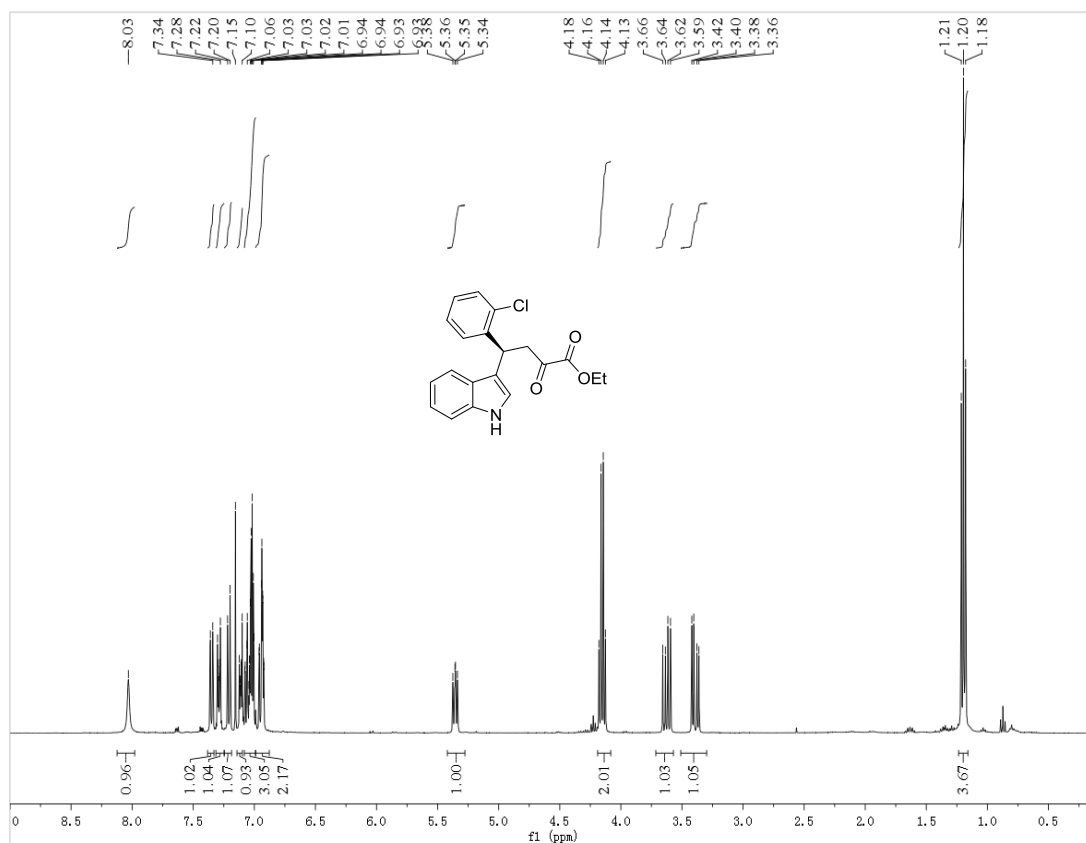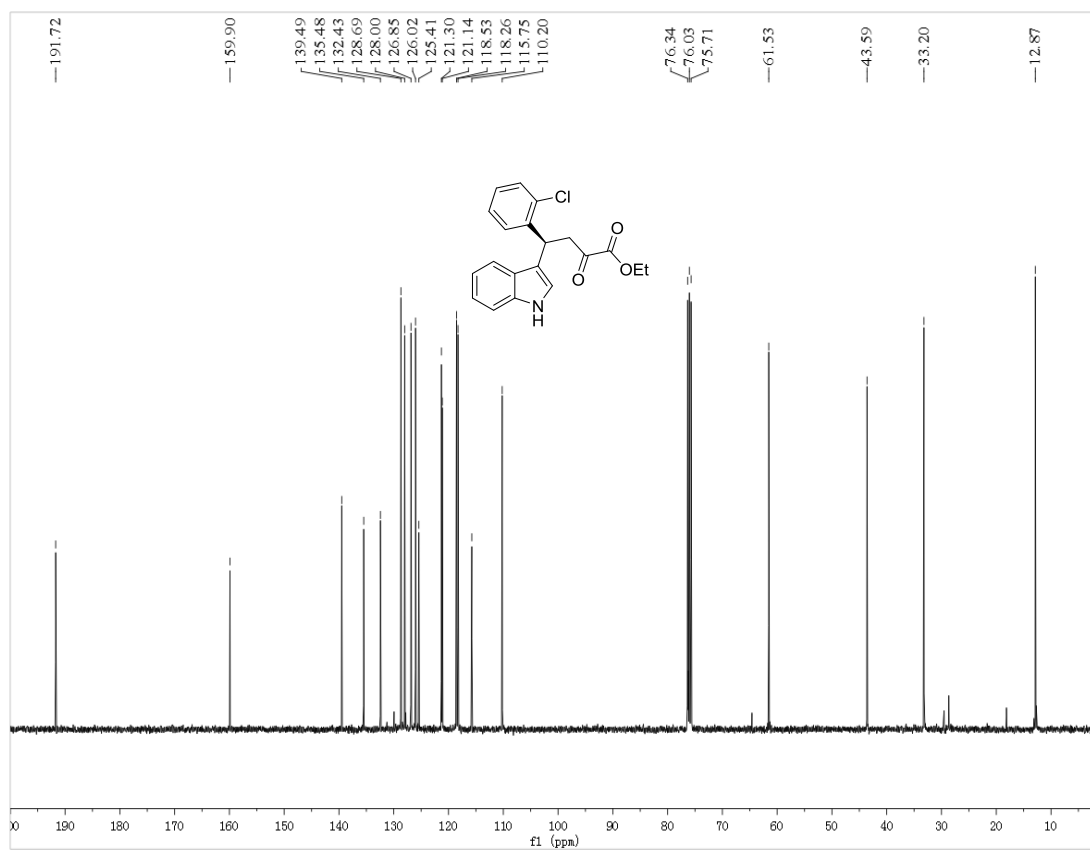

## HPLC of 6e

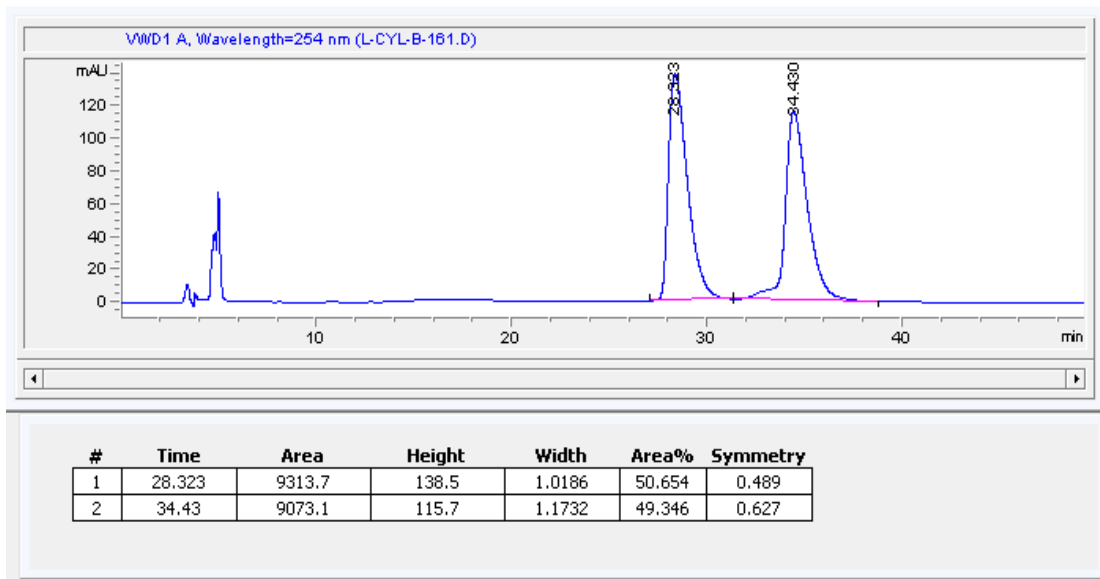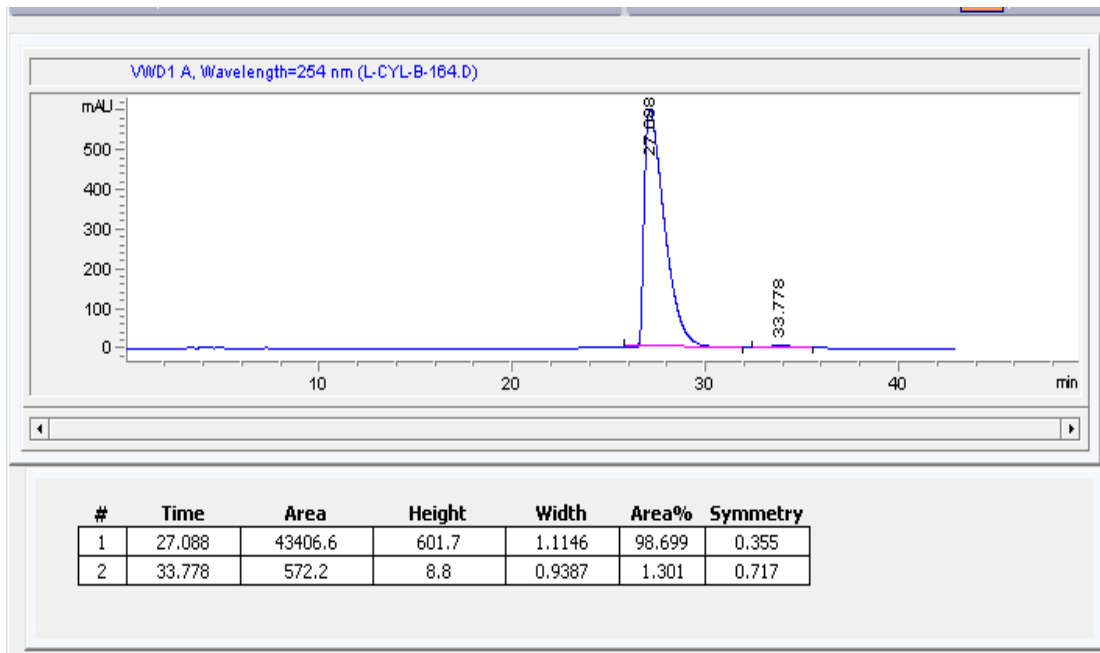

# $^1\text{H}$ and $^{13}\text{C}$ NMR of 6f

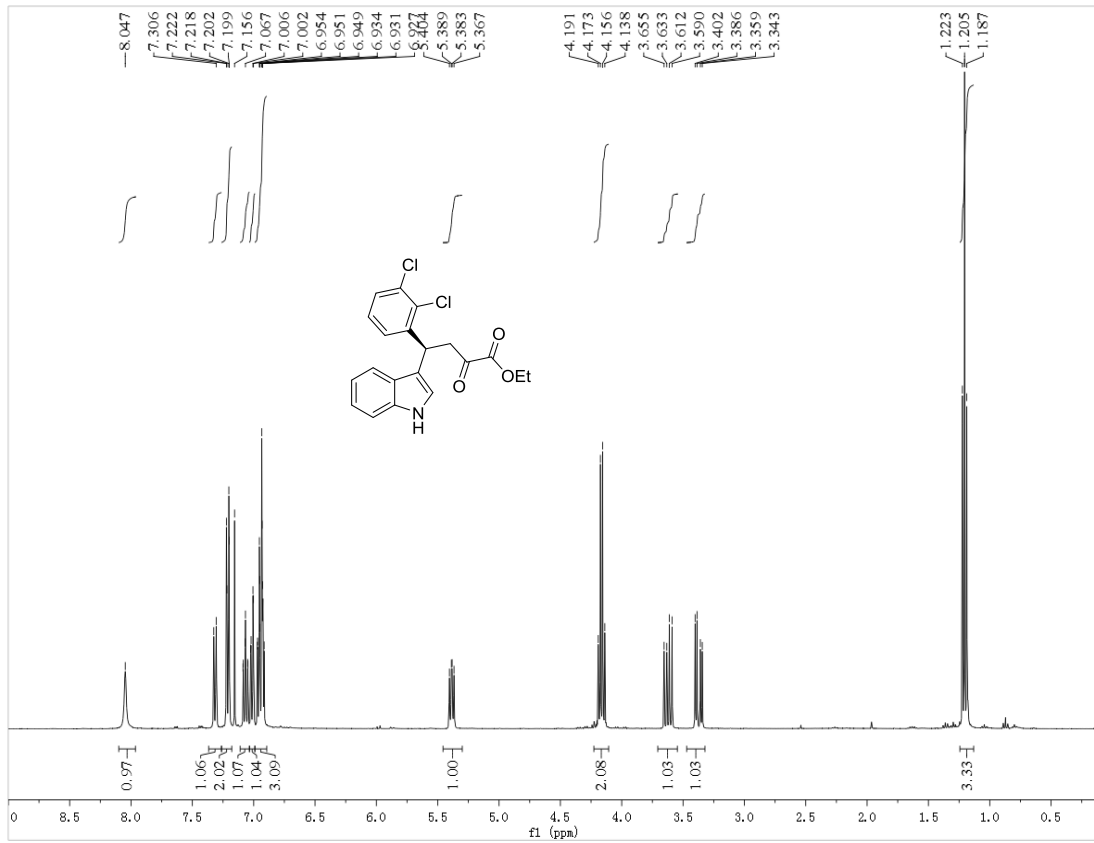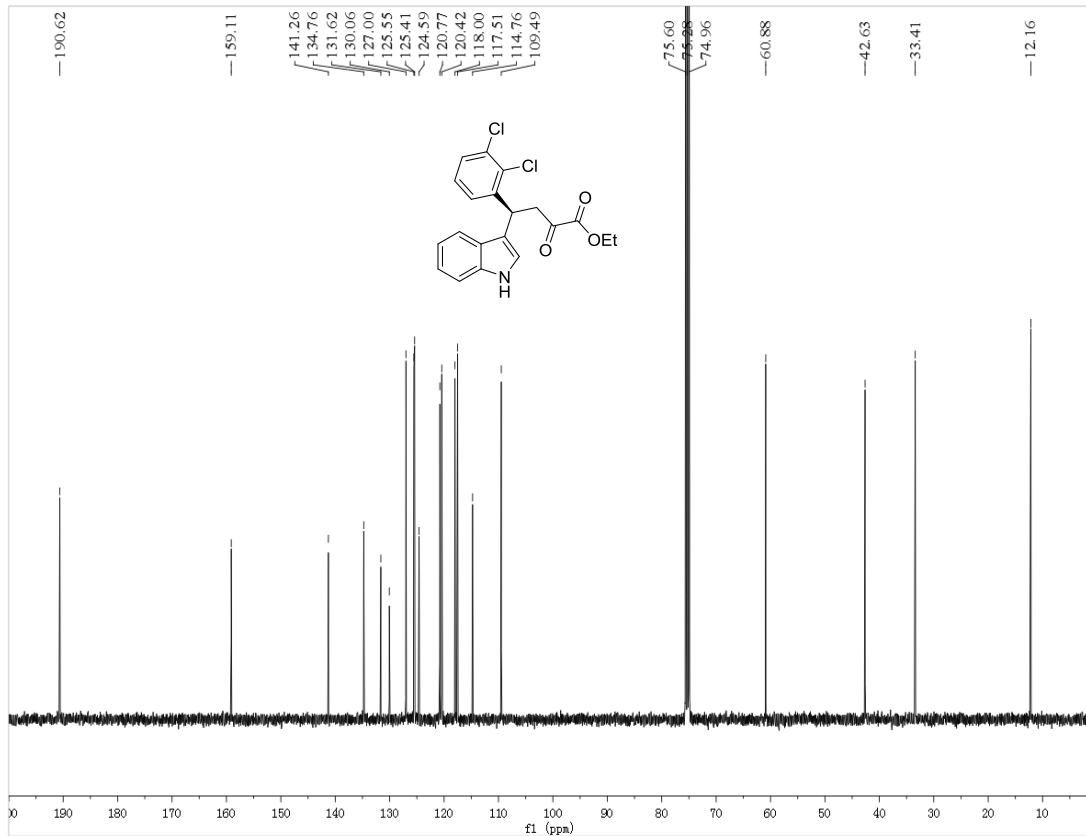

## HPLC of 6f

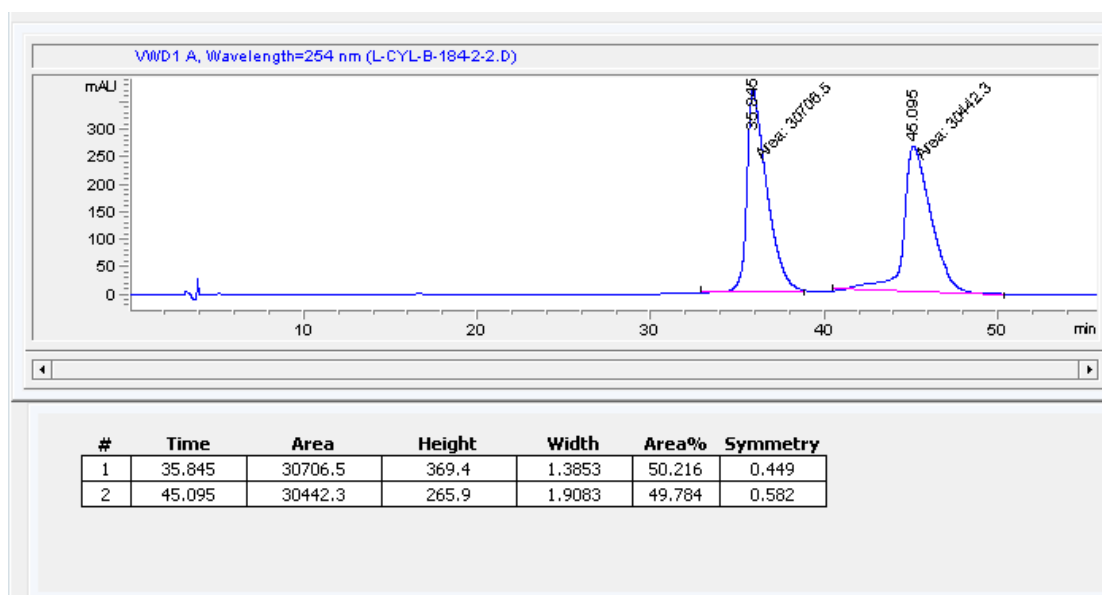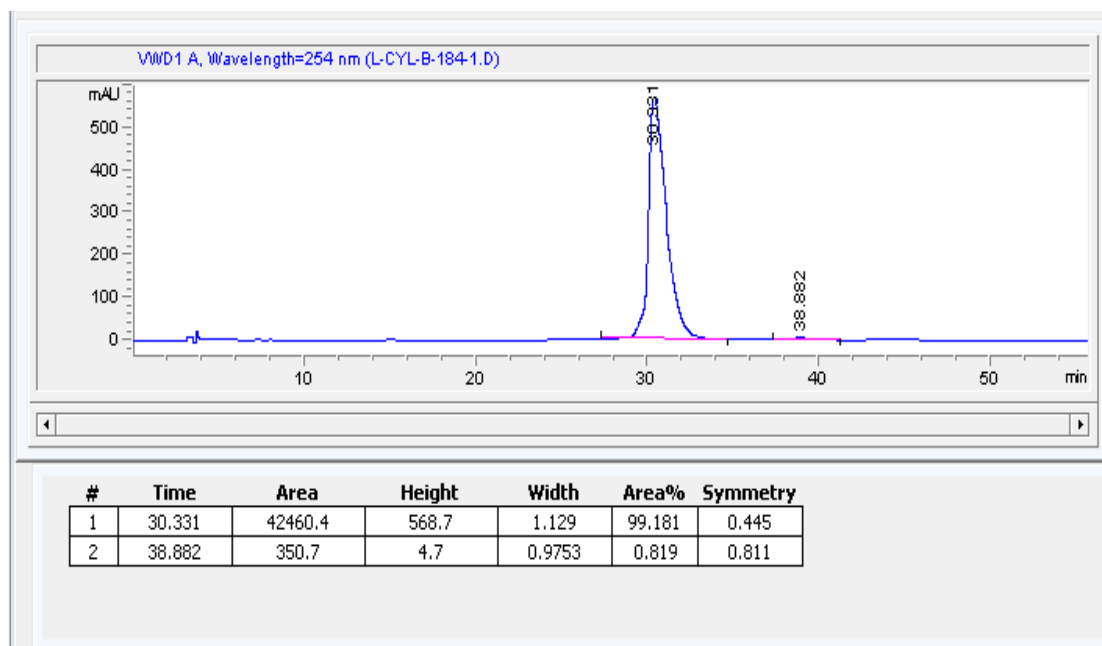



# $^1\text{H}$ and $^{13}\text{C}$ NMR of 6g

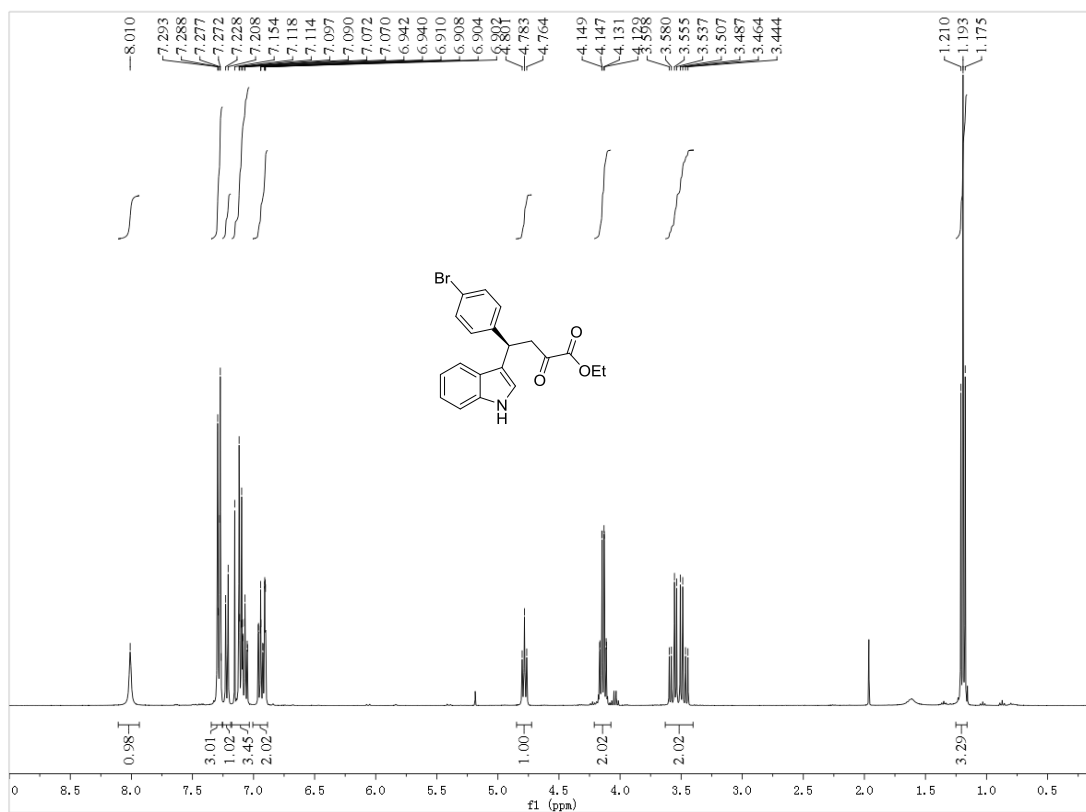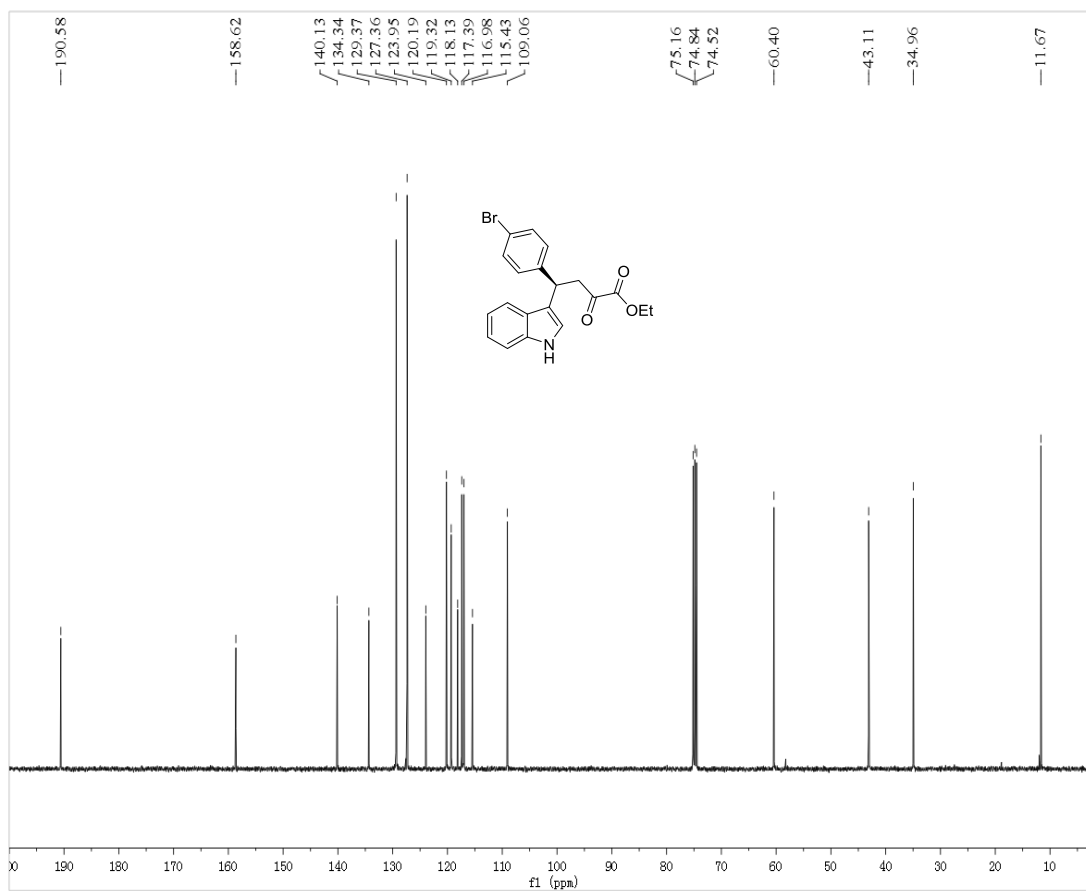

### HPLC of 6g

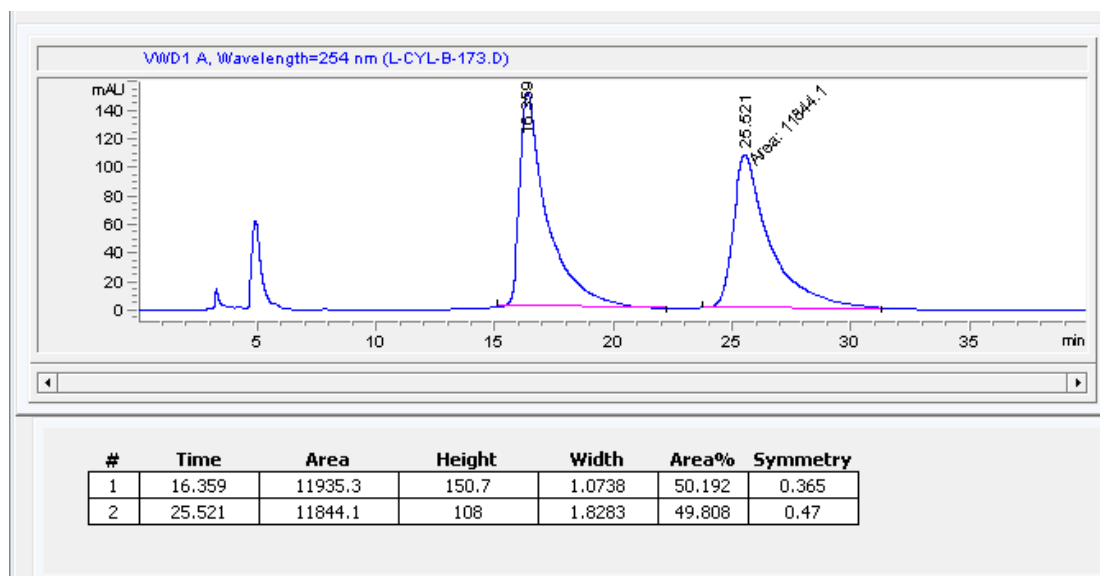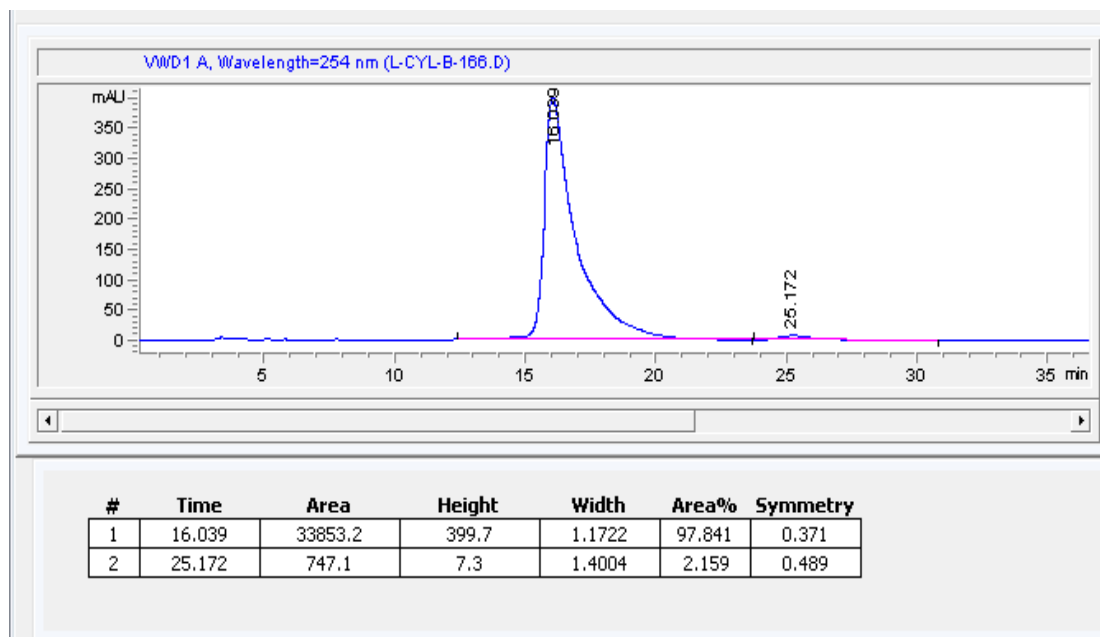

# <sup>1</sup>H and <sup>13</sup>C NMR of 6h

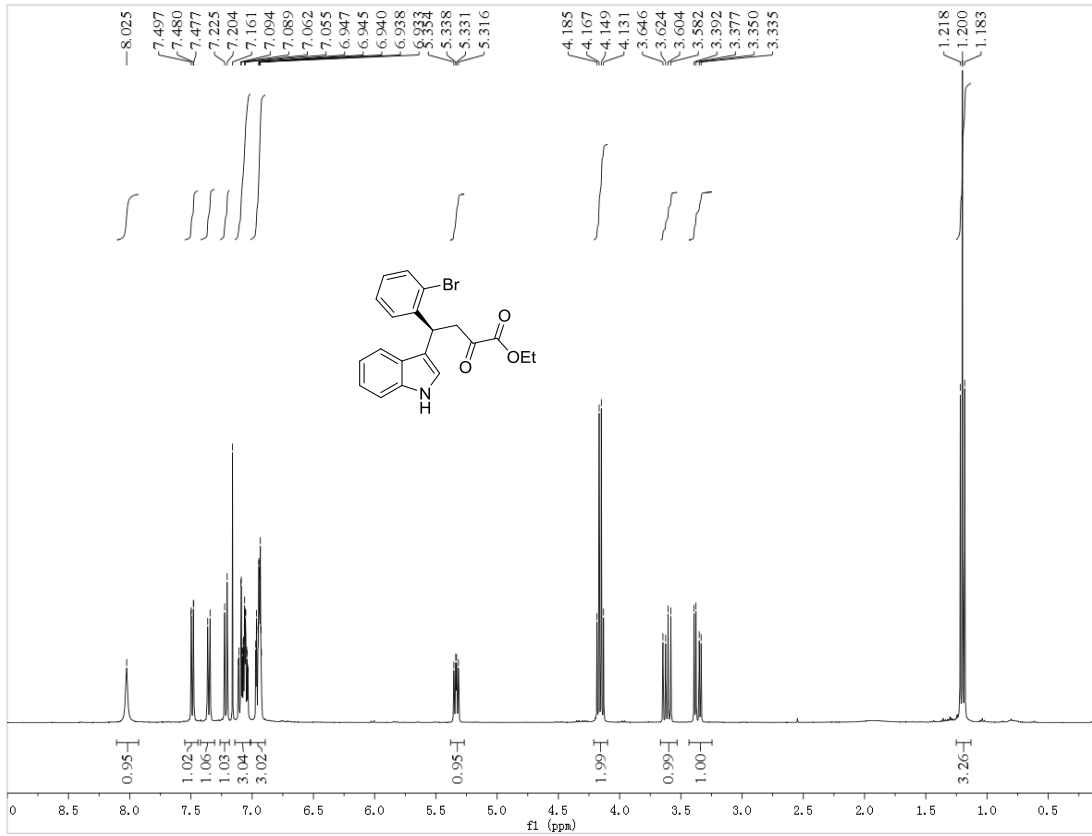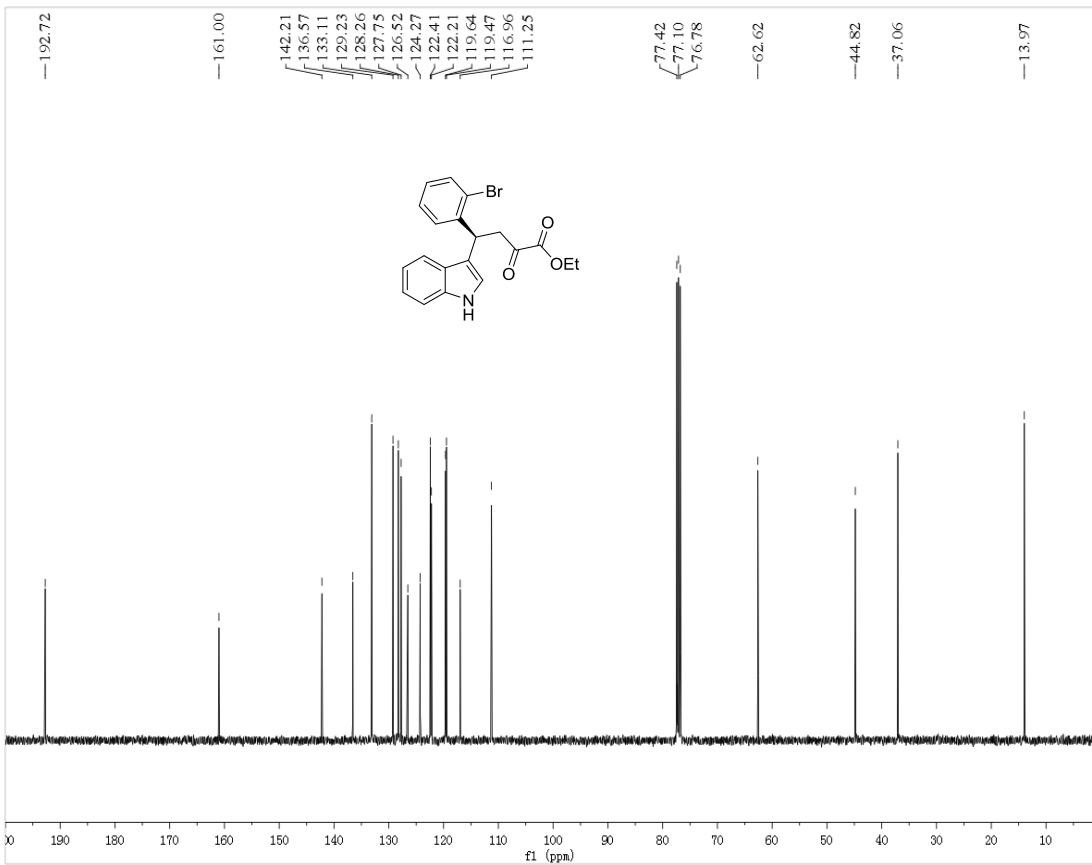

### HPLC of 6h

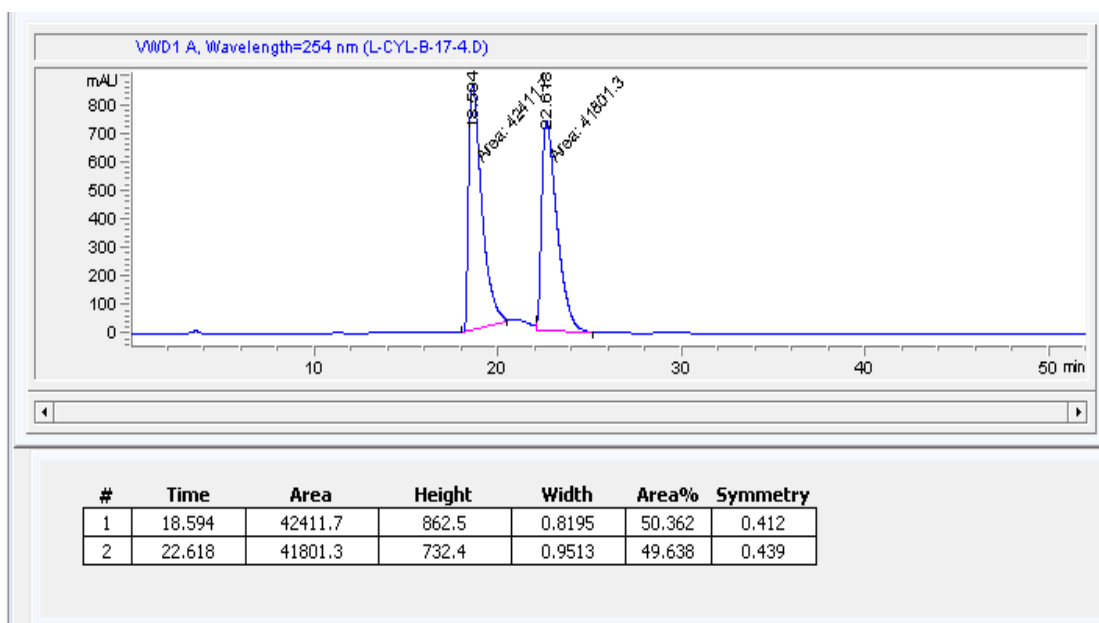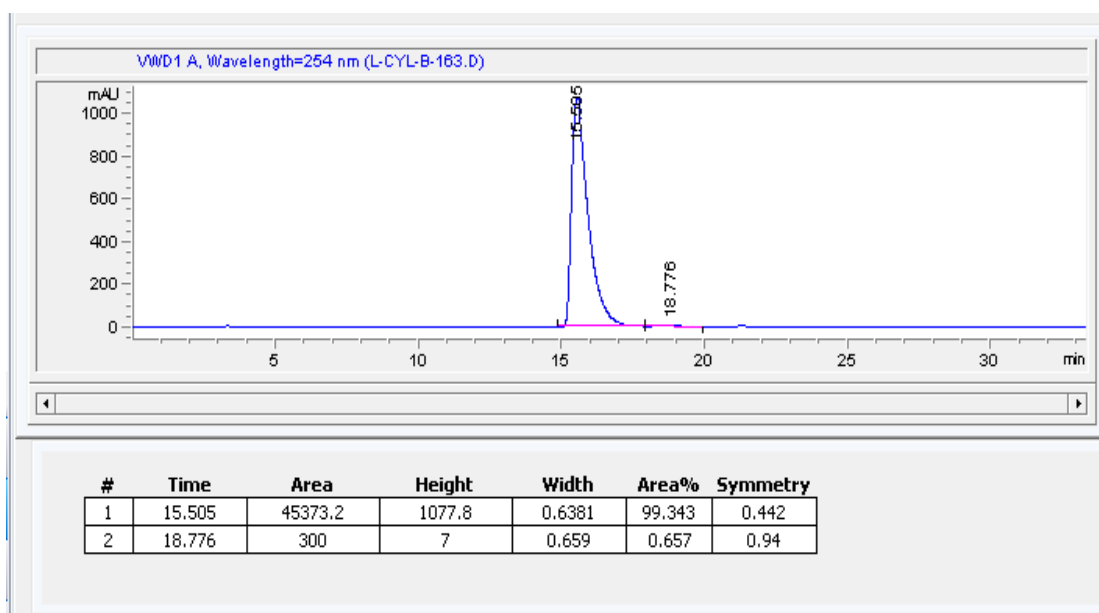

<sup>1</sup>H and <sup>13</sup>C NMR of 6i

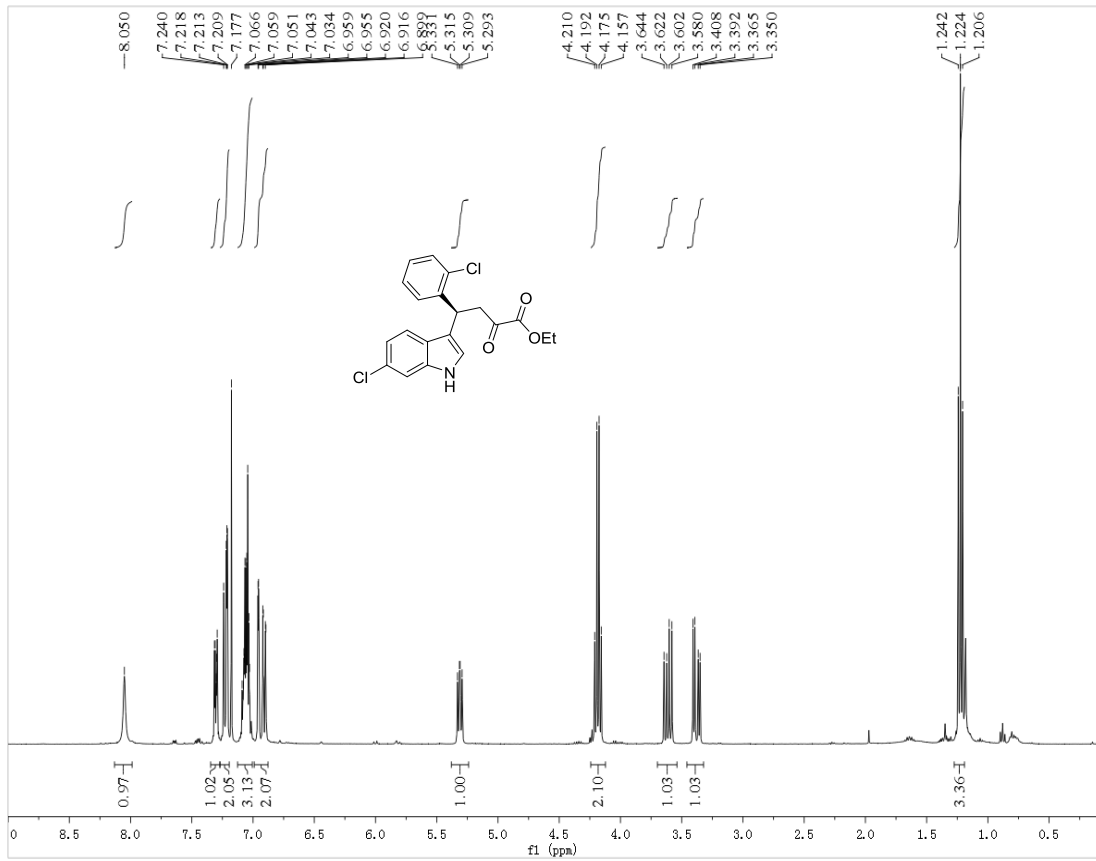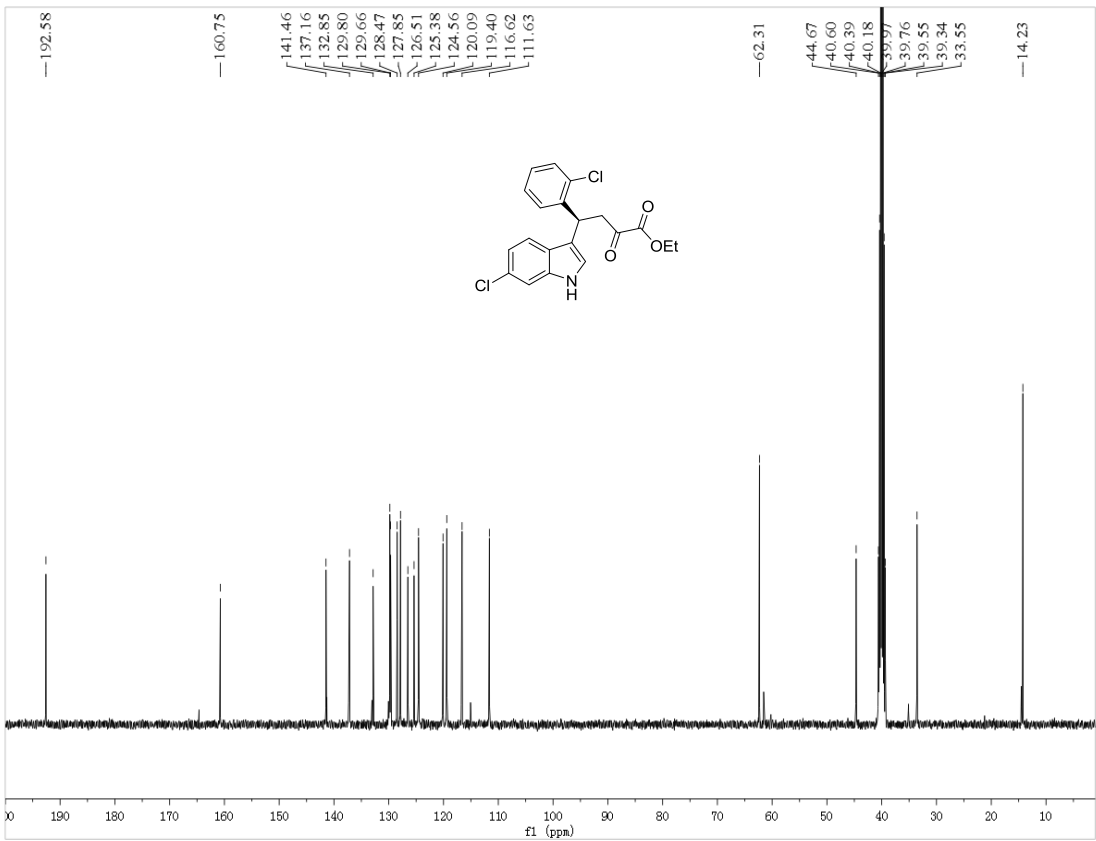

## HPLC of 6i

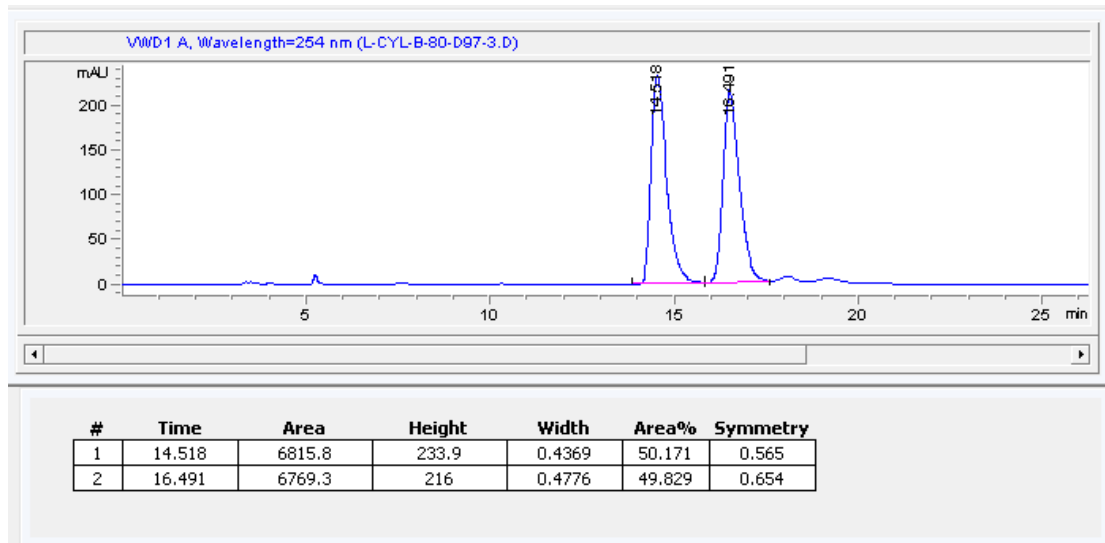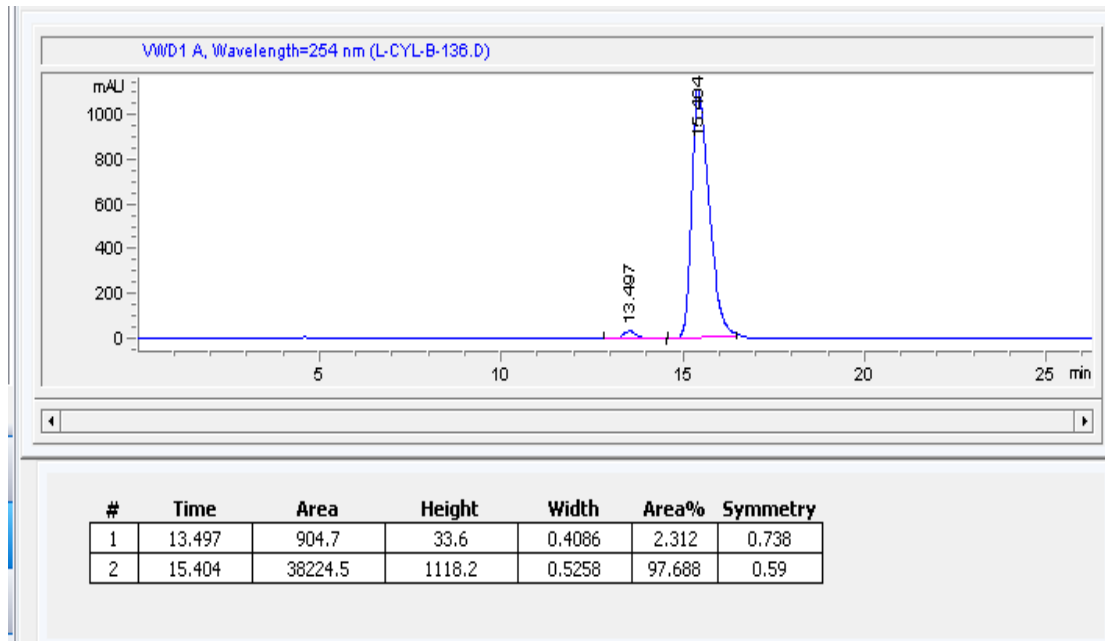

# <sup>1</sup>H and <sup>13</sup>C NMR of 6j

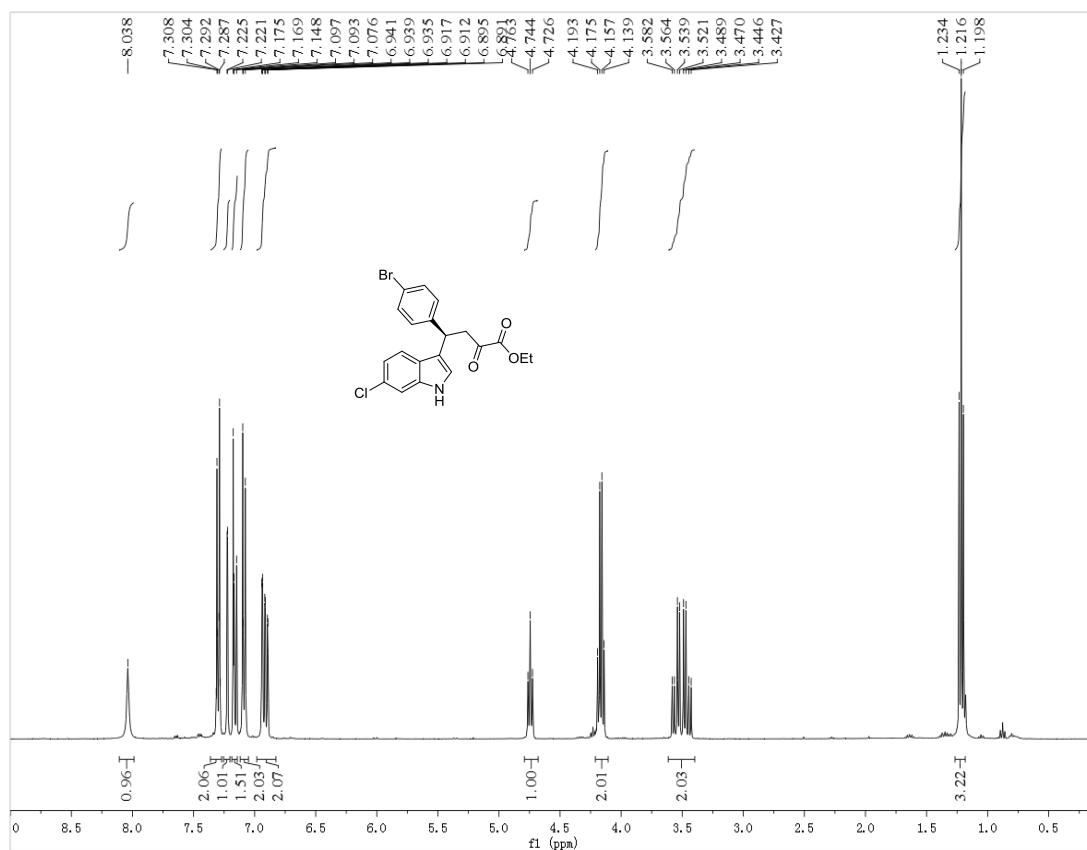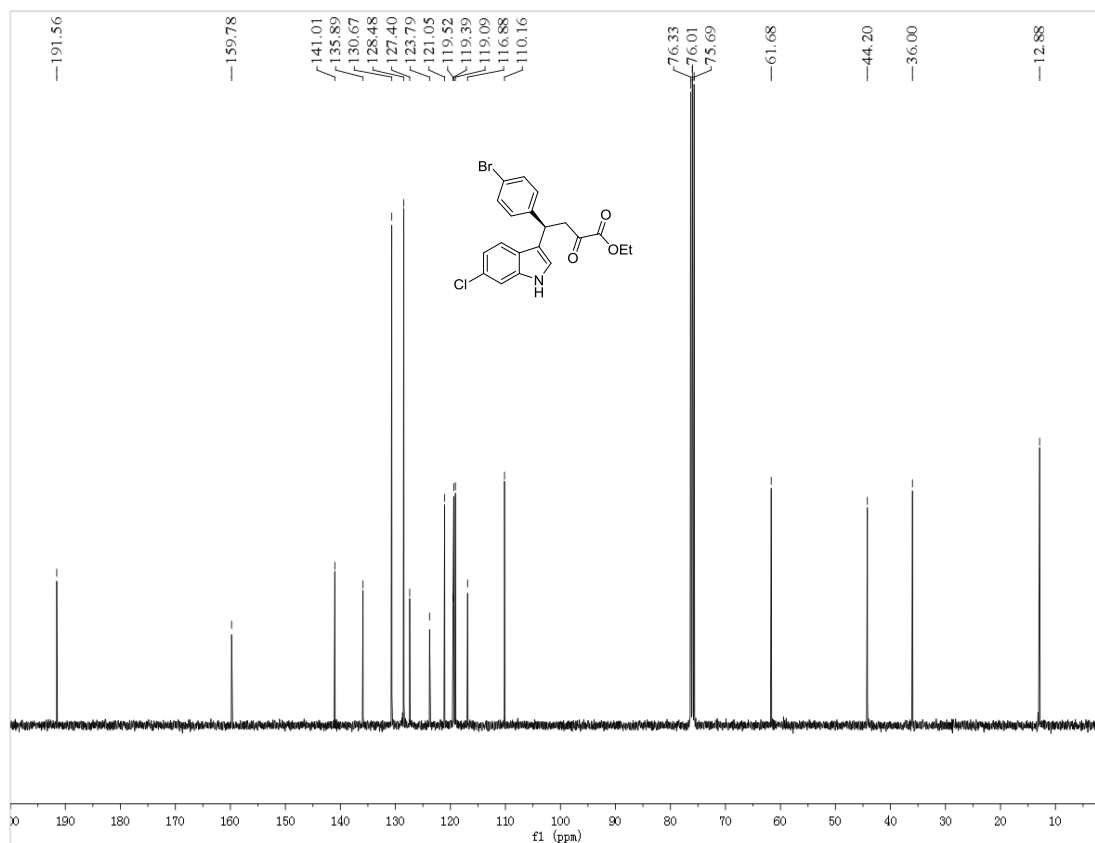

## HPLC of 6j

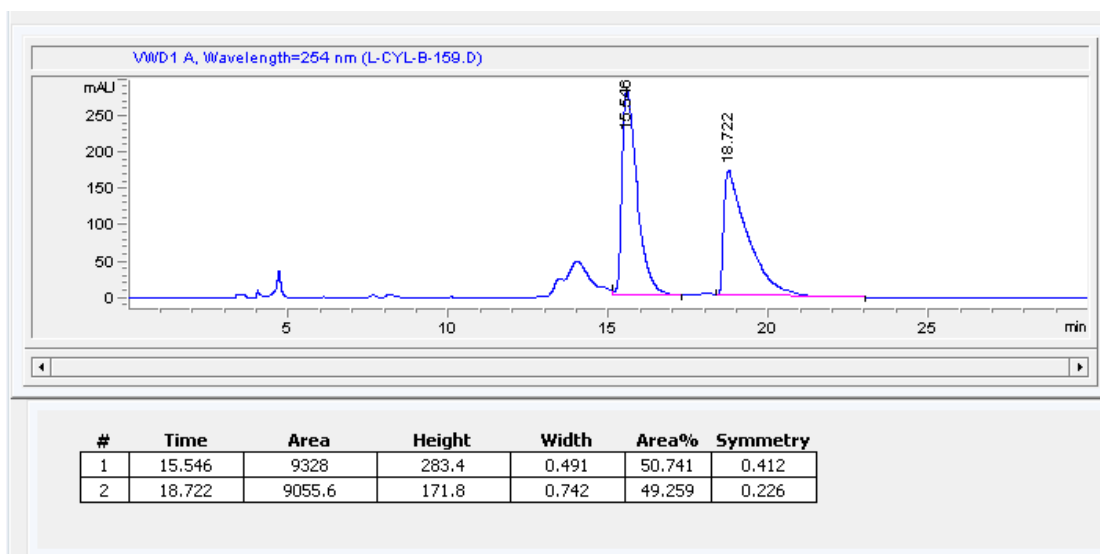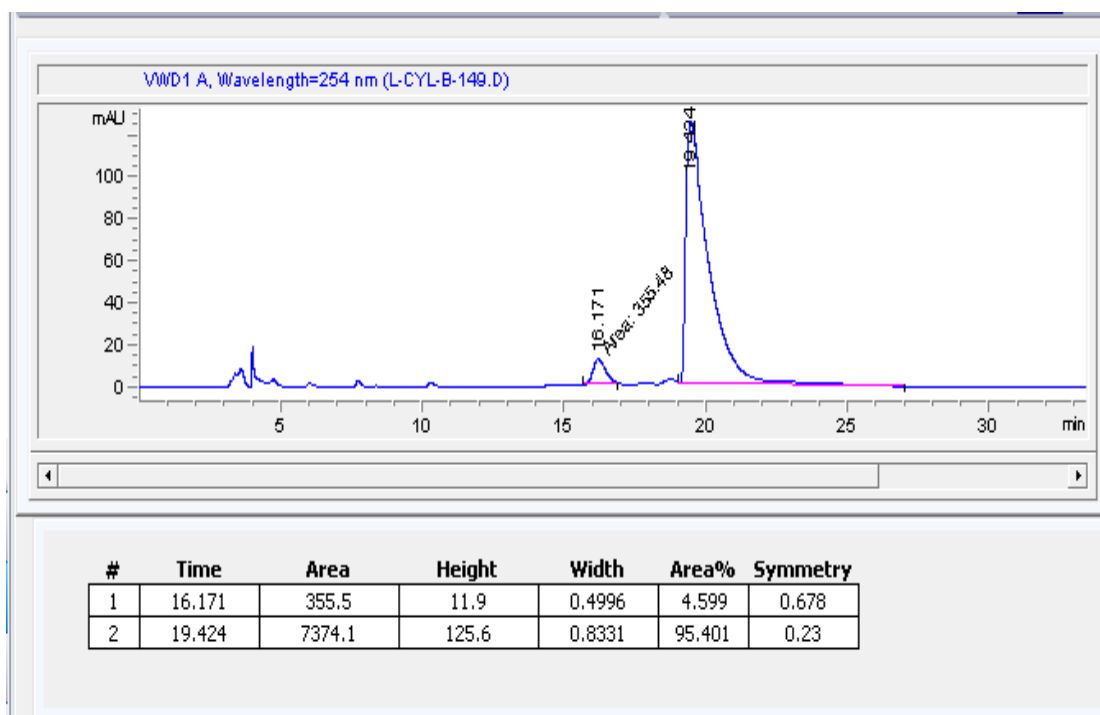



# <sup>1</sup>H and <sup>13</sup>C NMR of 6k

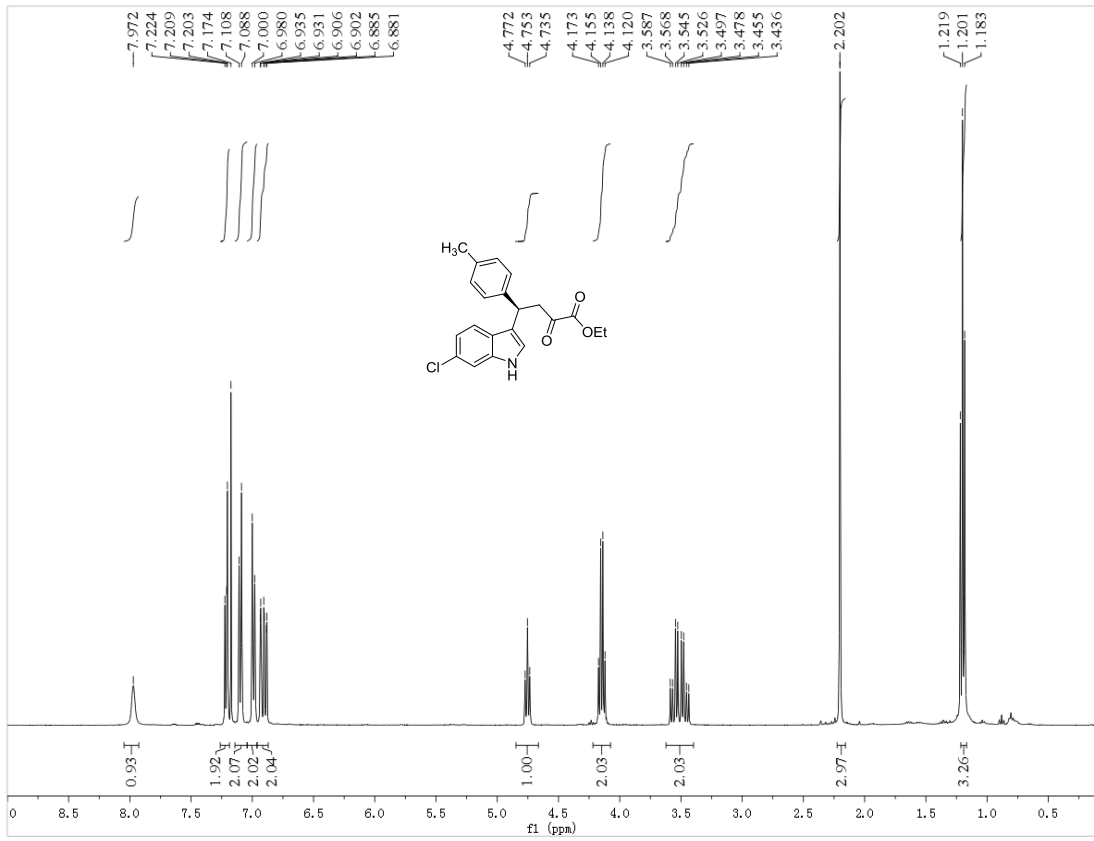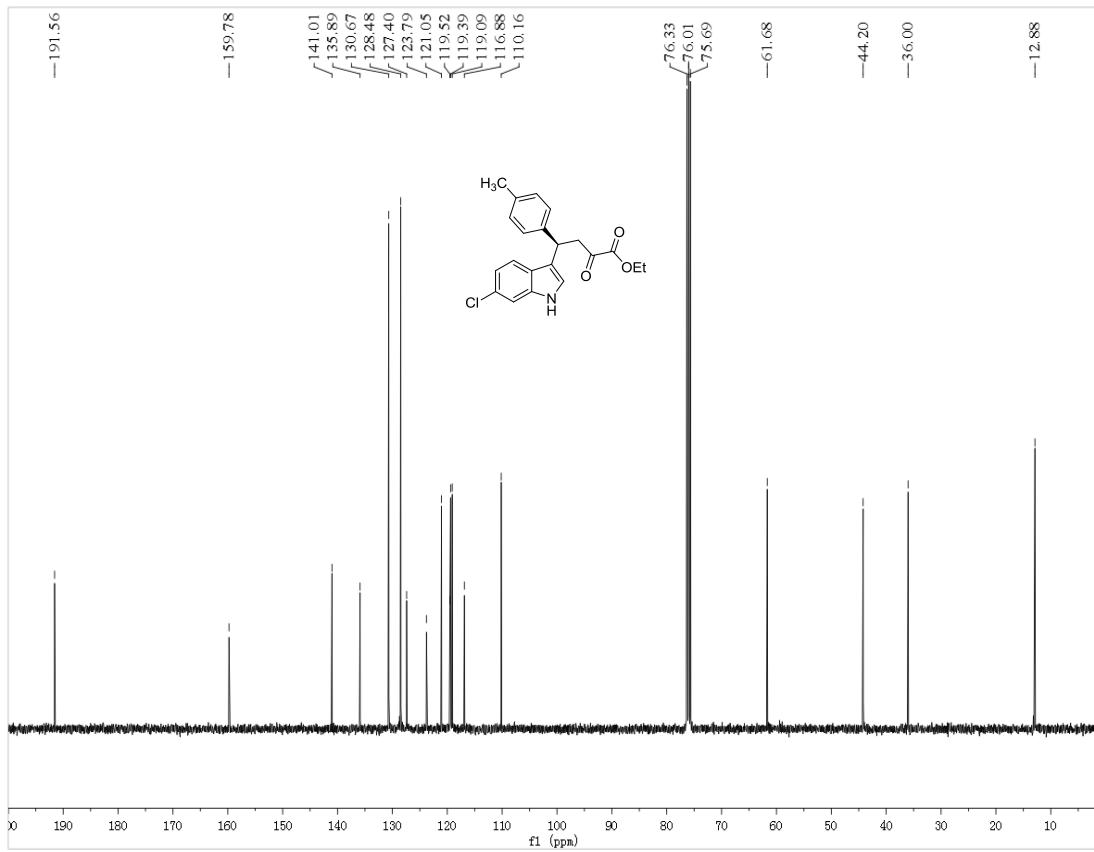

## HPLC of 6k

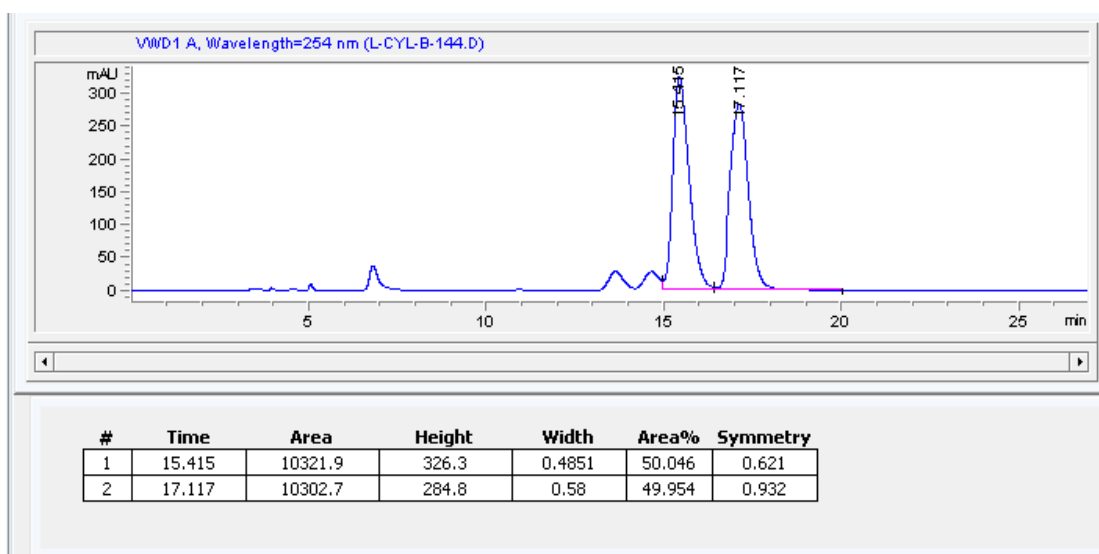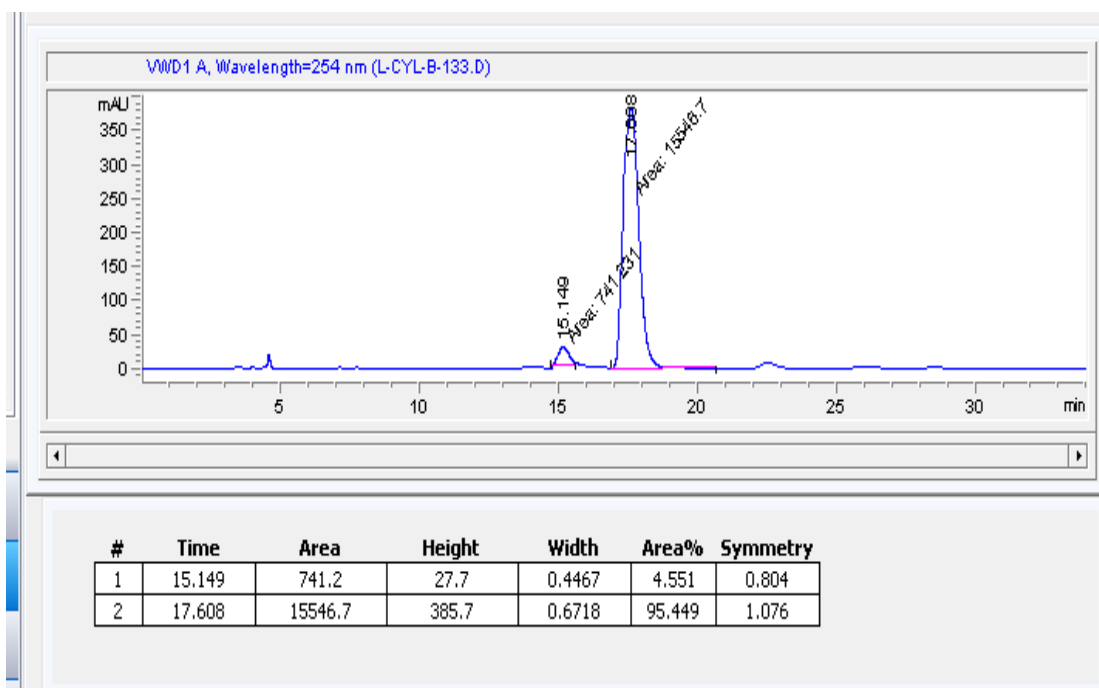

# $^1\text{H}$ and $^{13}\text{C}$ NMR of 6l

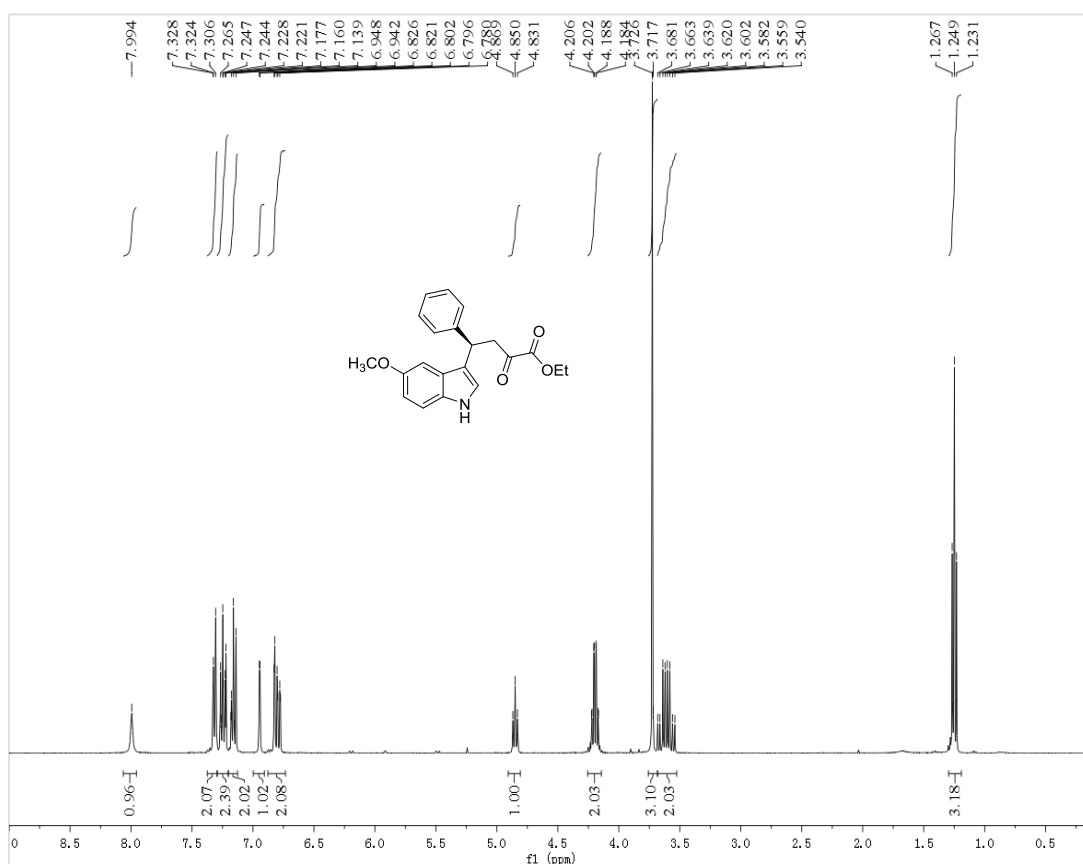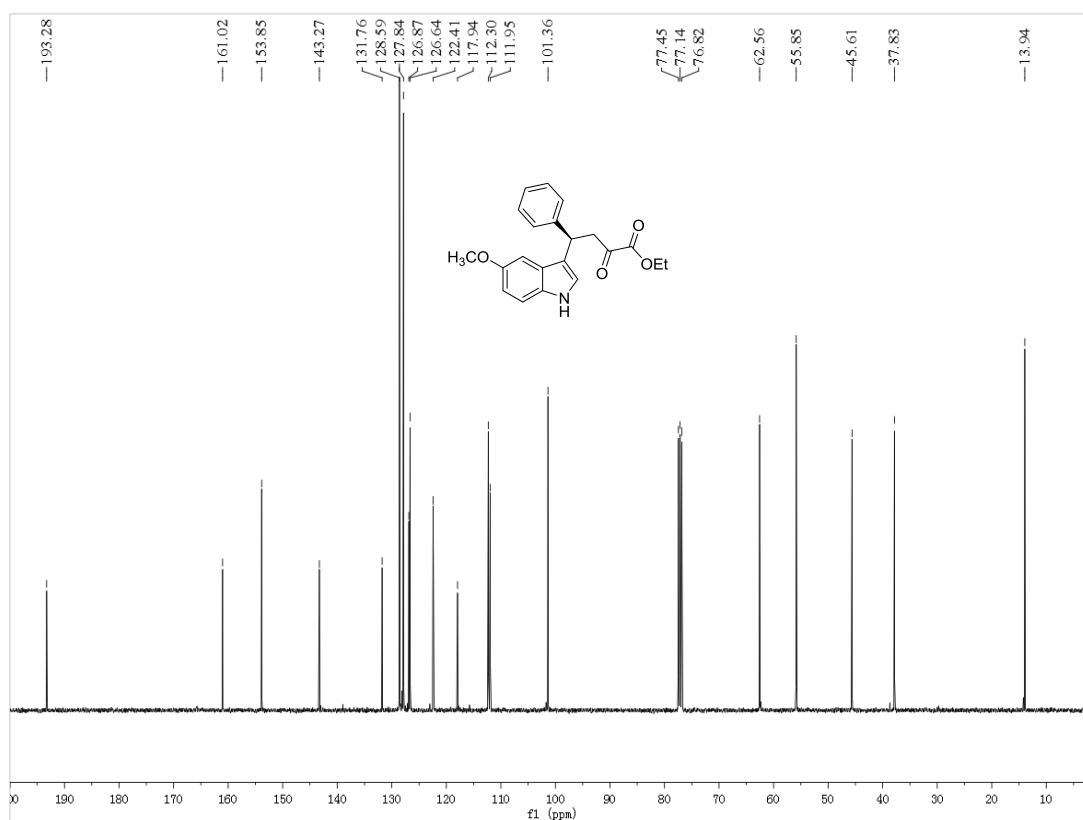

# HPLC of 6l

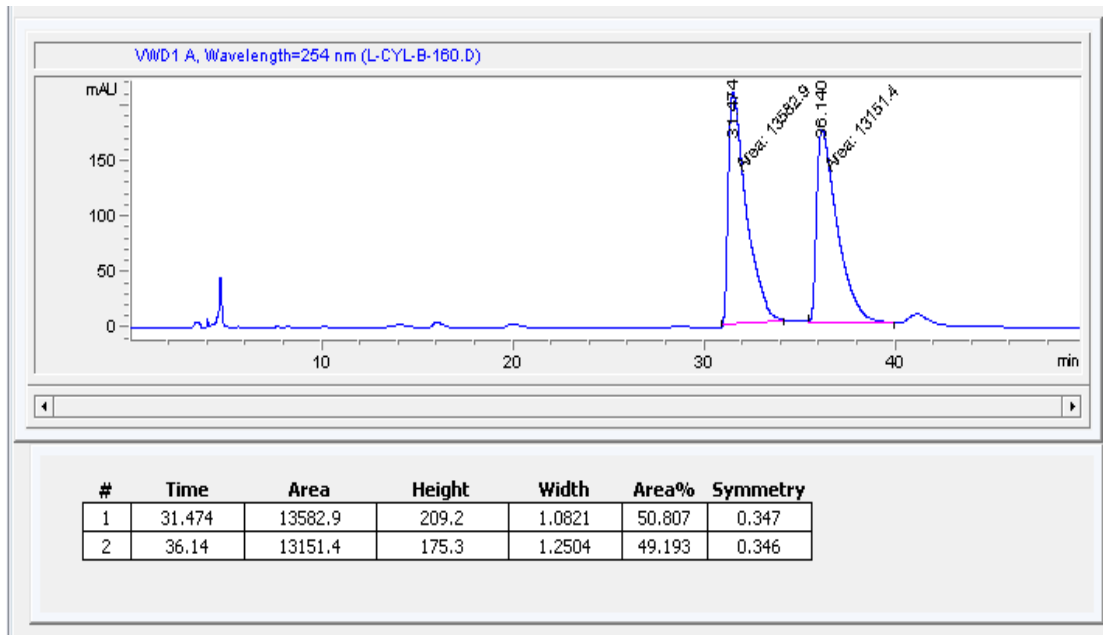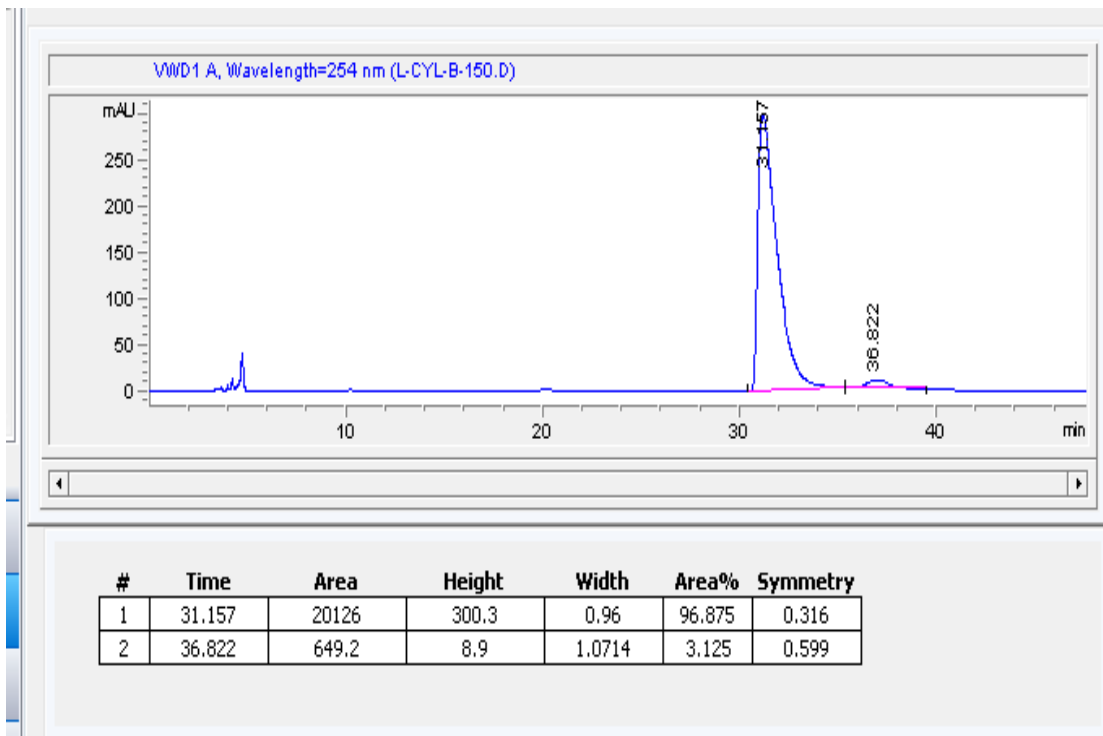

# <sup>1</sup>H and <sup>13</sup>C NMR of 6m

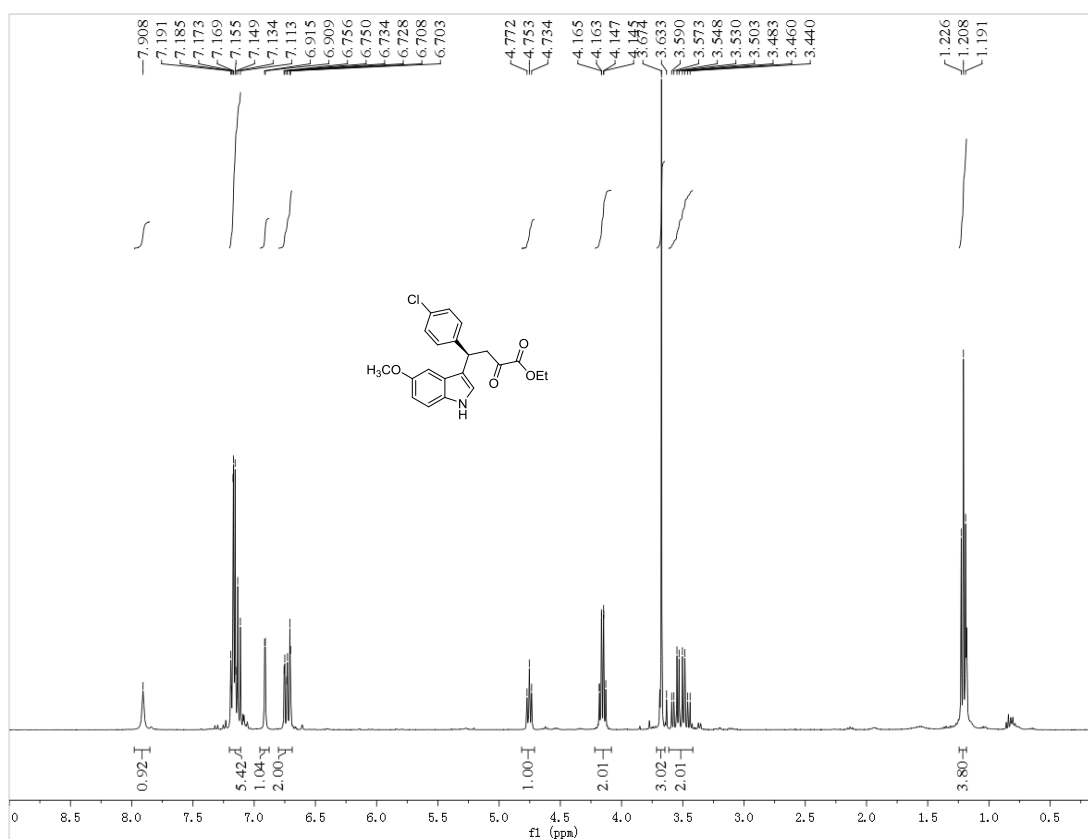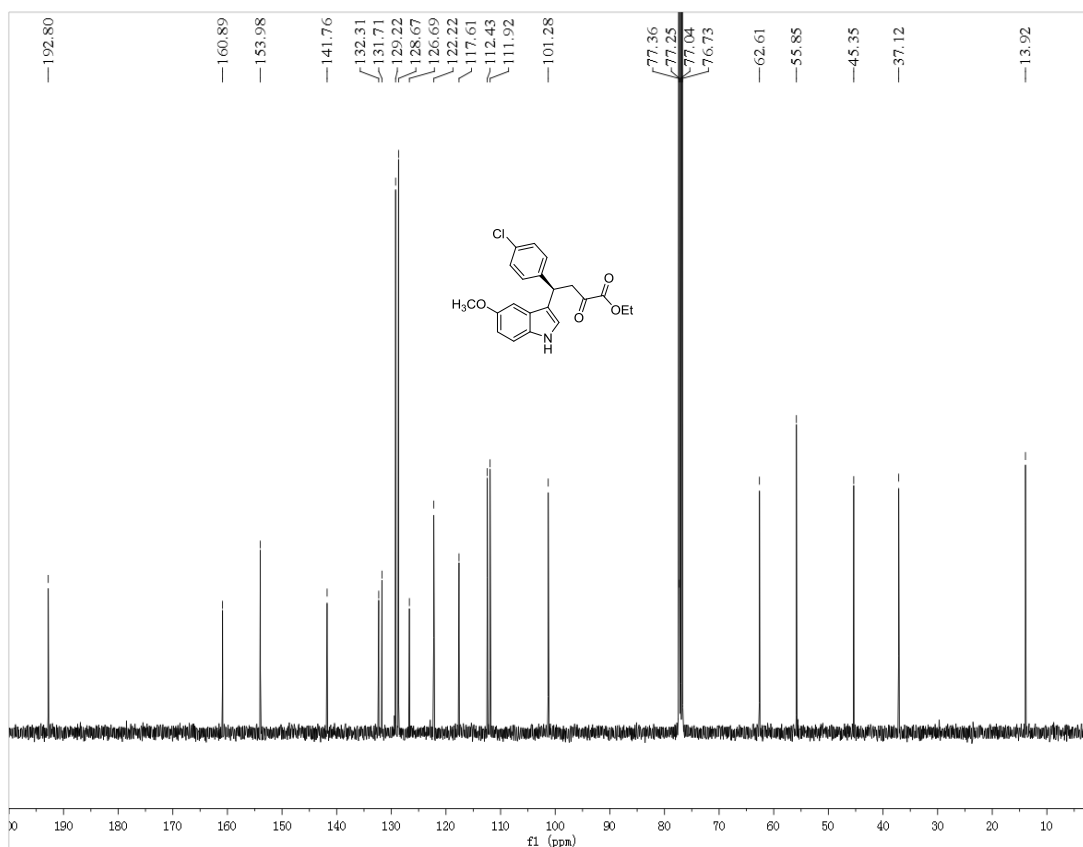

### HPLC of 6m

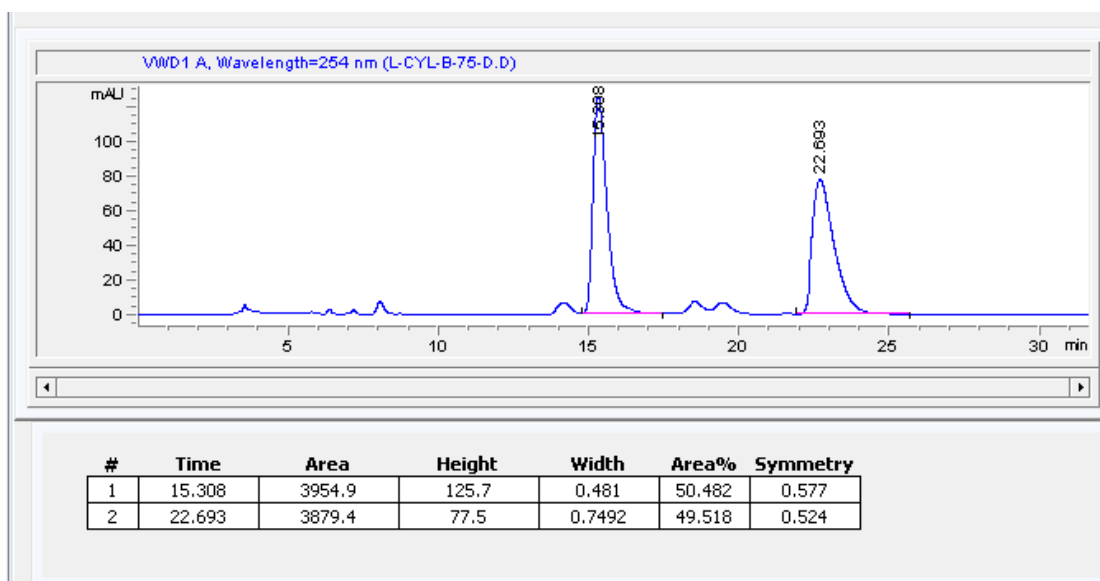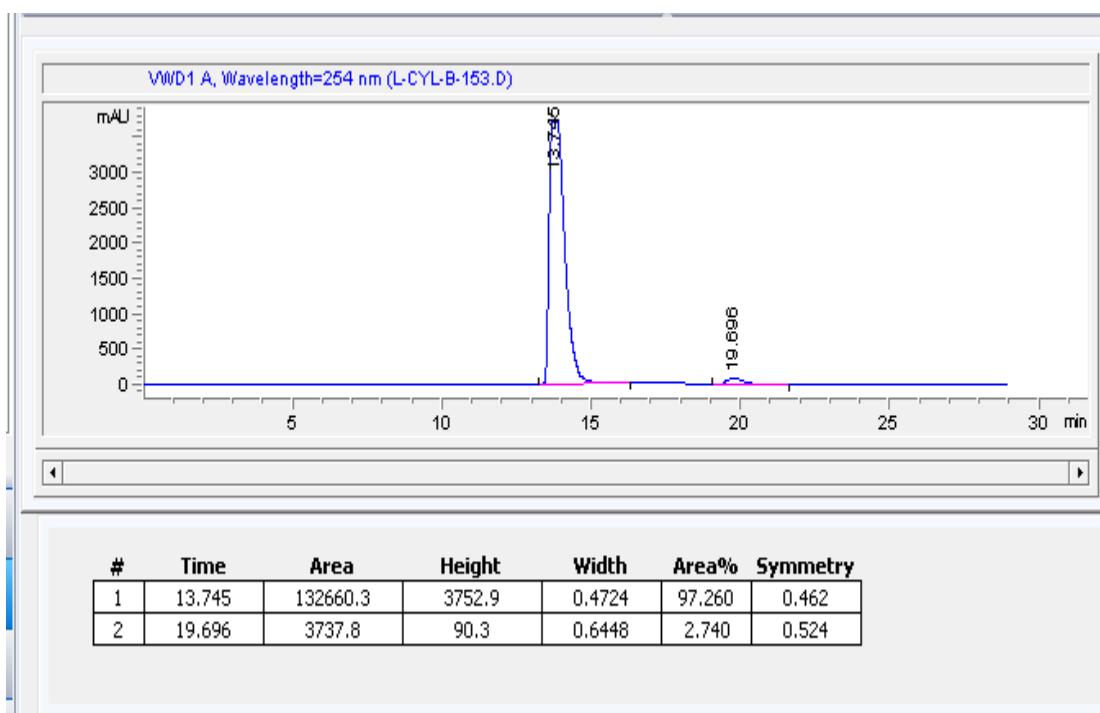

# <sup>1</sup>H and <sup>13</sup>C NMR of 6n

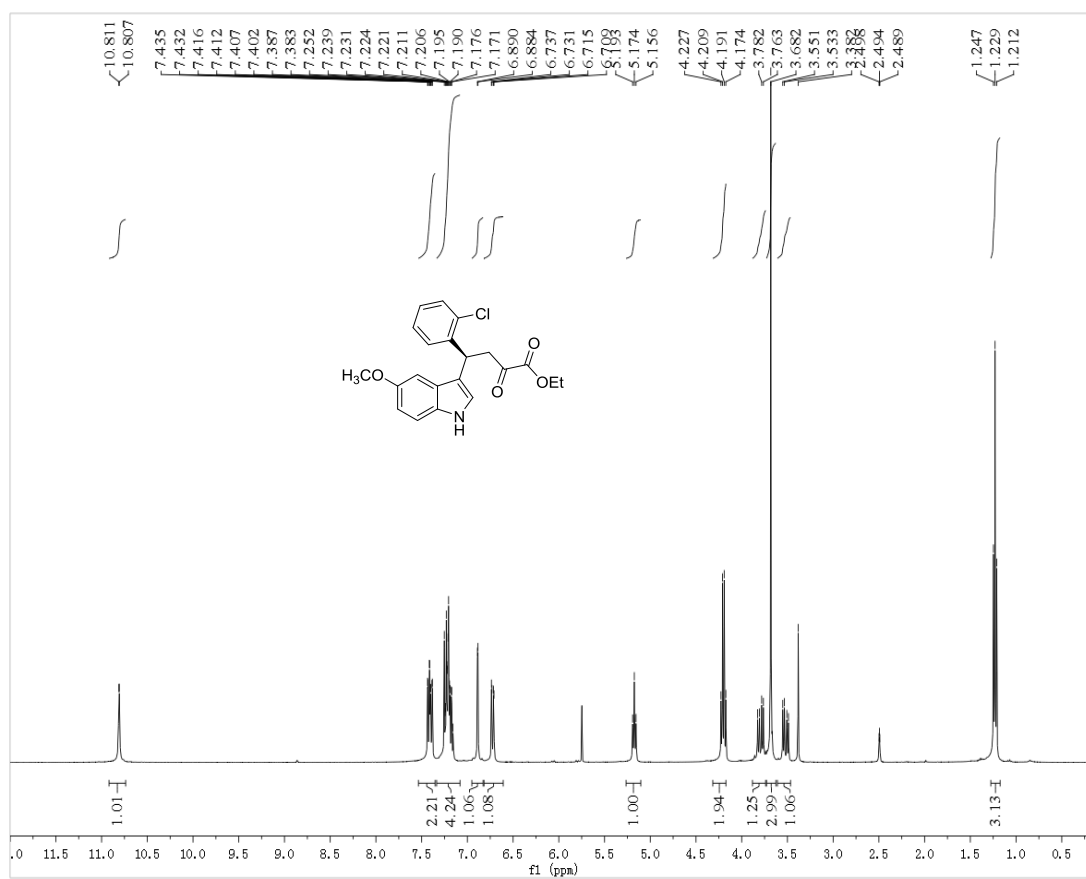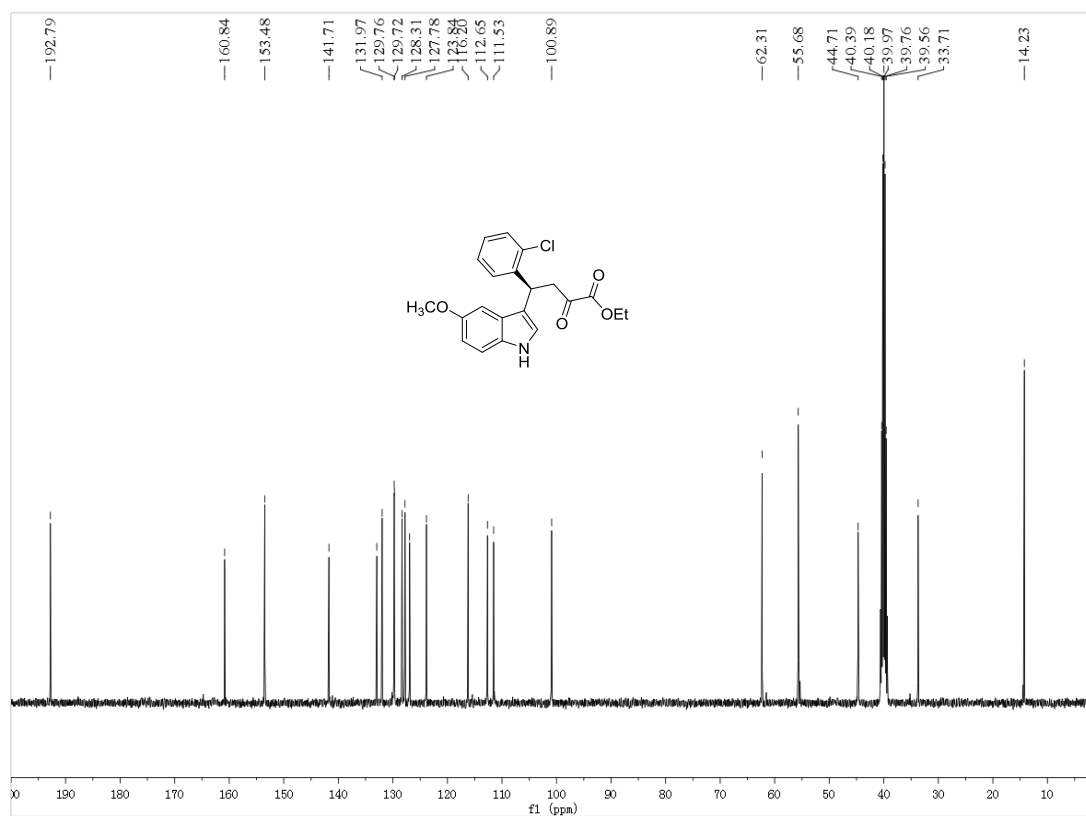

### HPLC of 6n

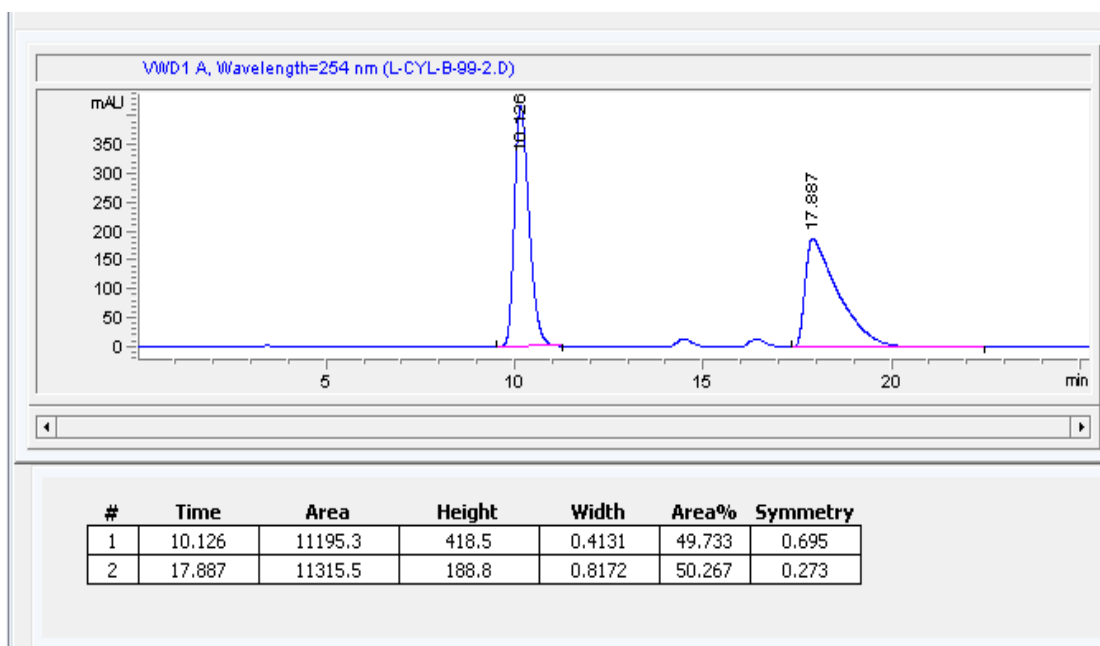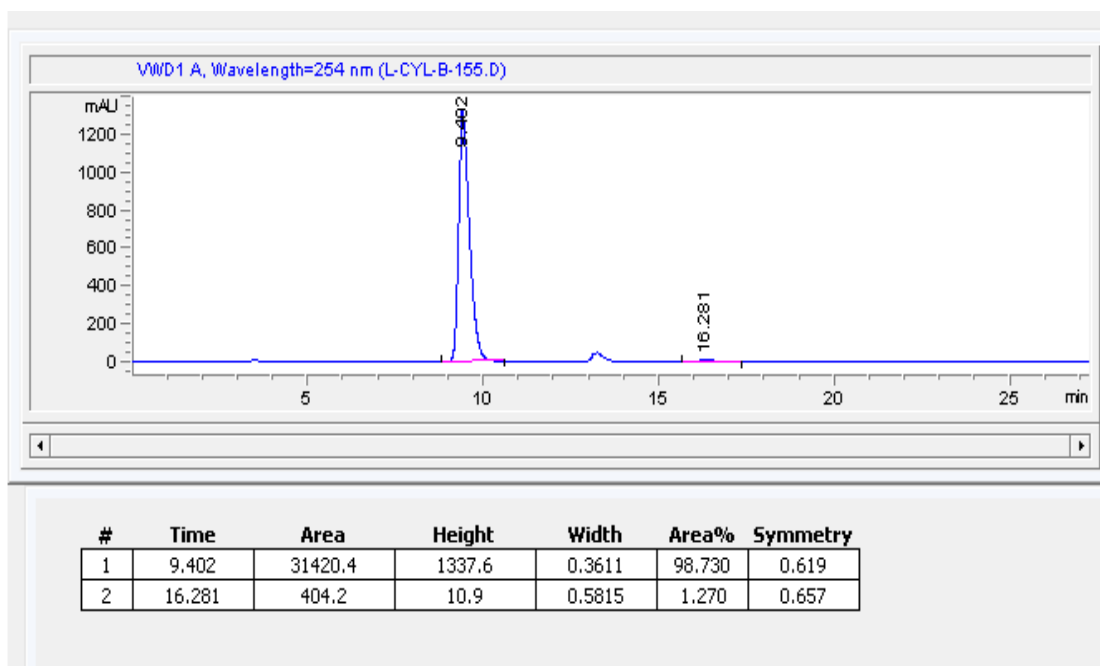



# <sup>1</sup>H and <sup>13</sup>C NMR of 60

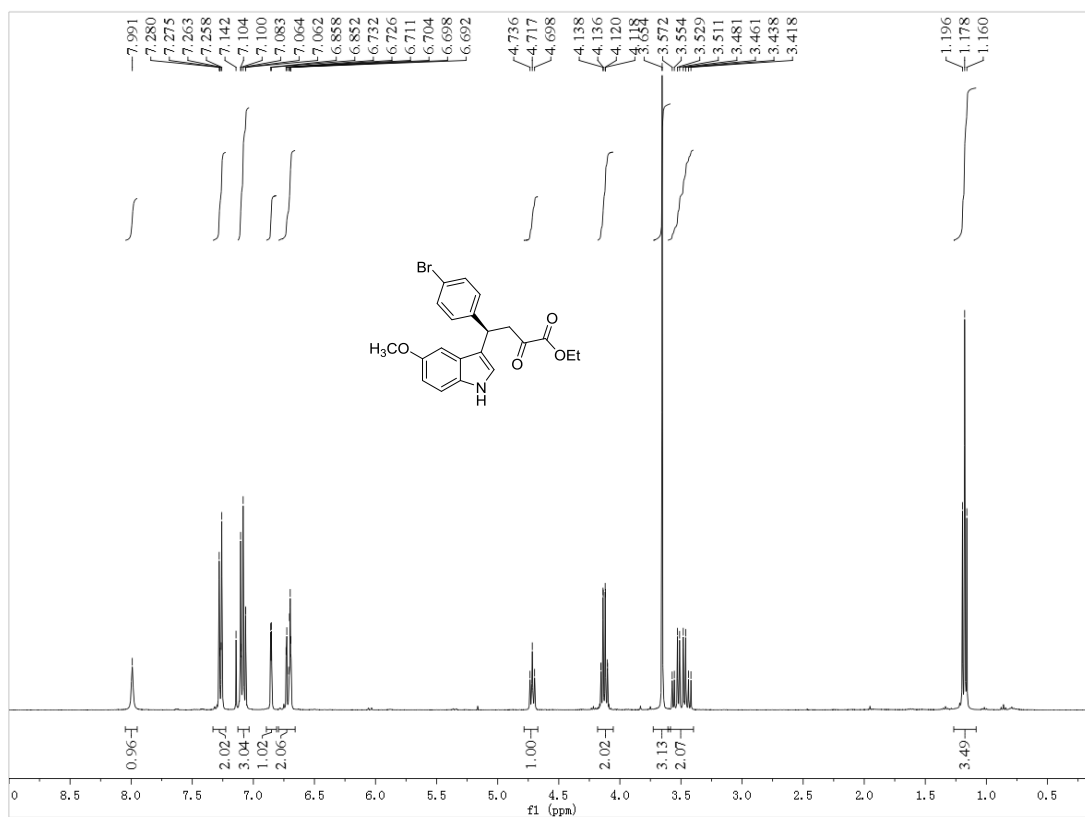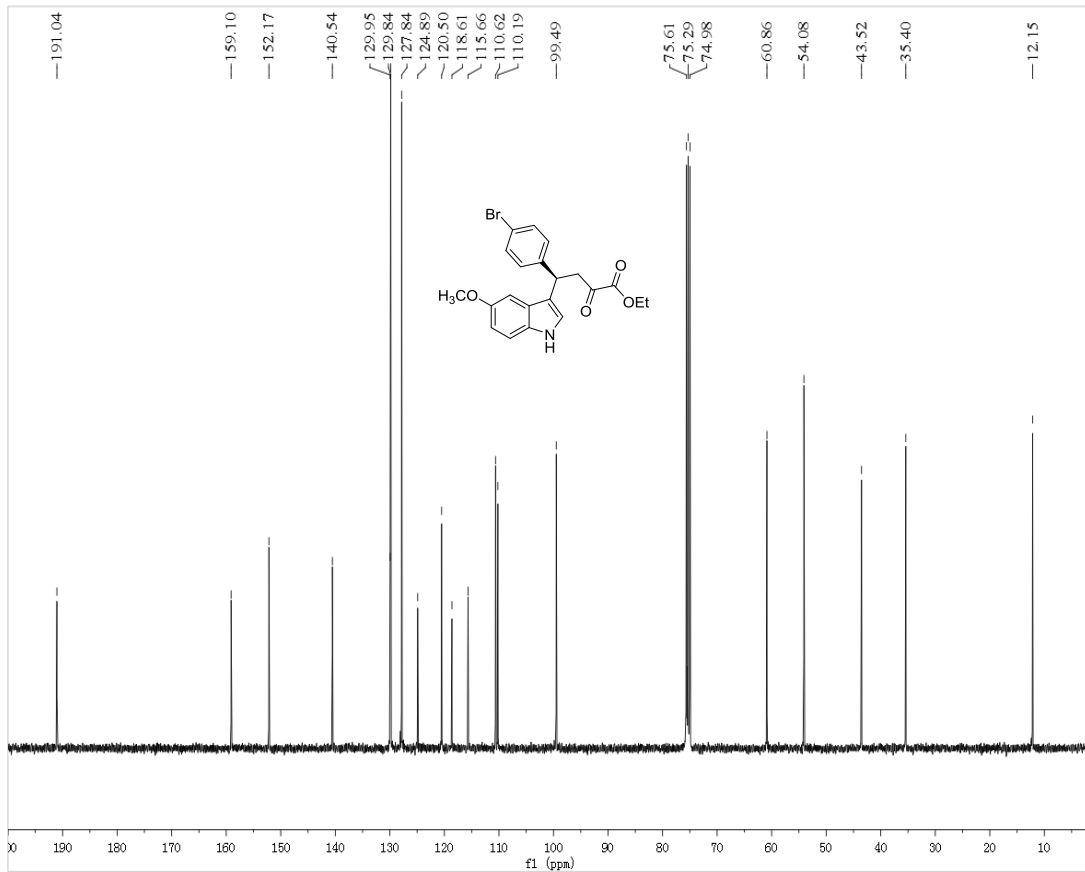

### HPLC of 6o

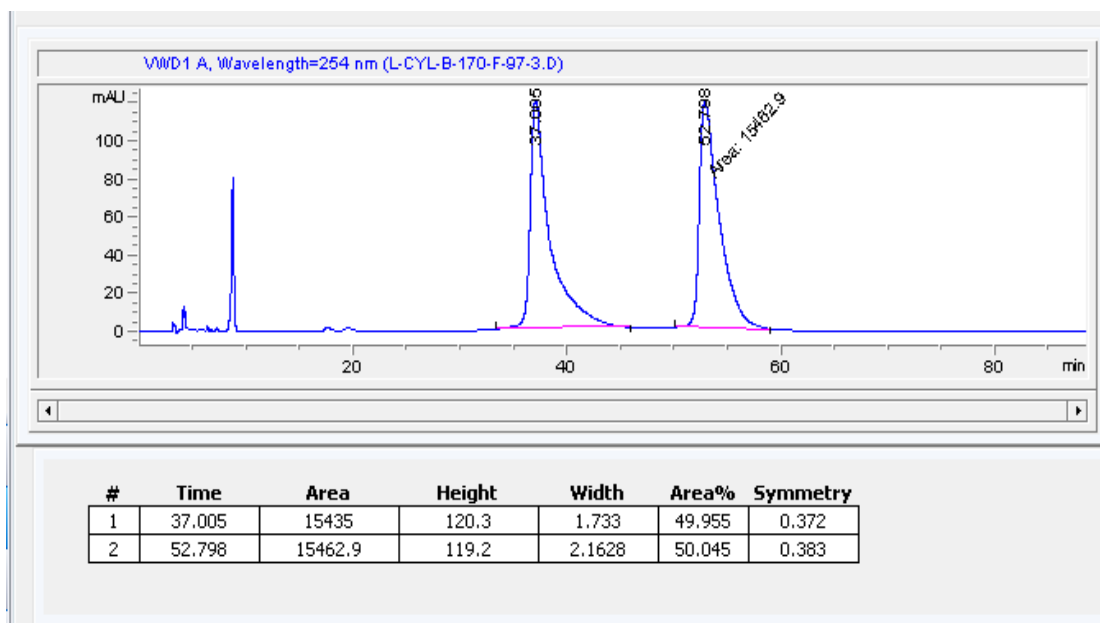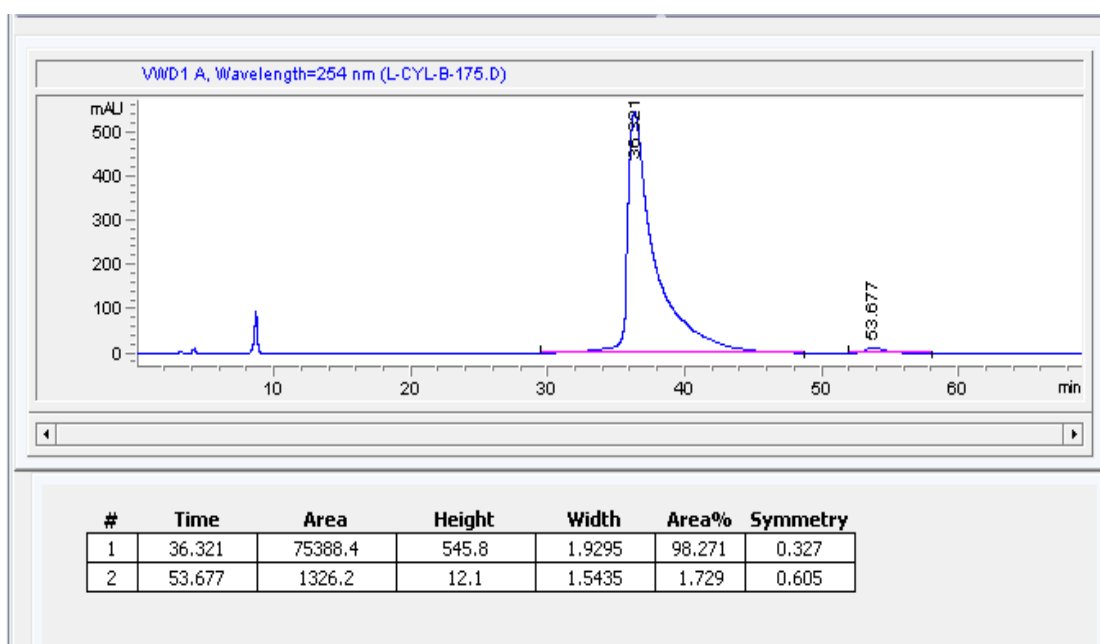

# <sup>1</sup>H and <sup>13</sup>C NMR of 6p

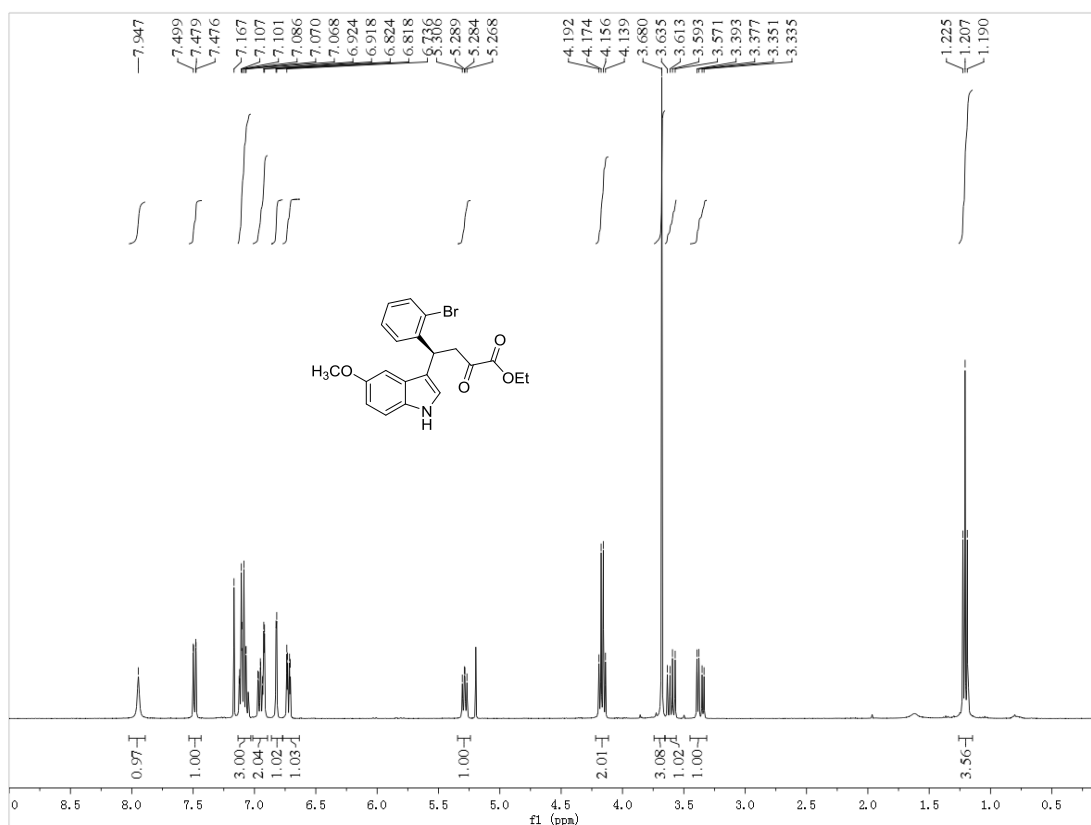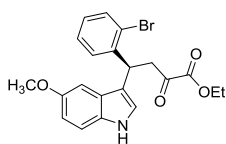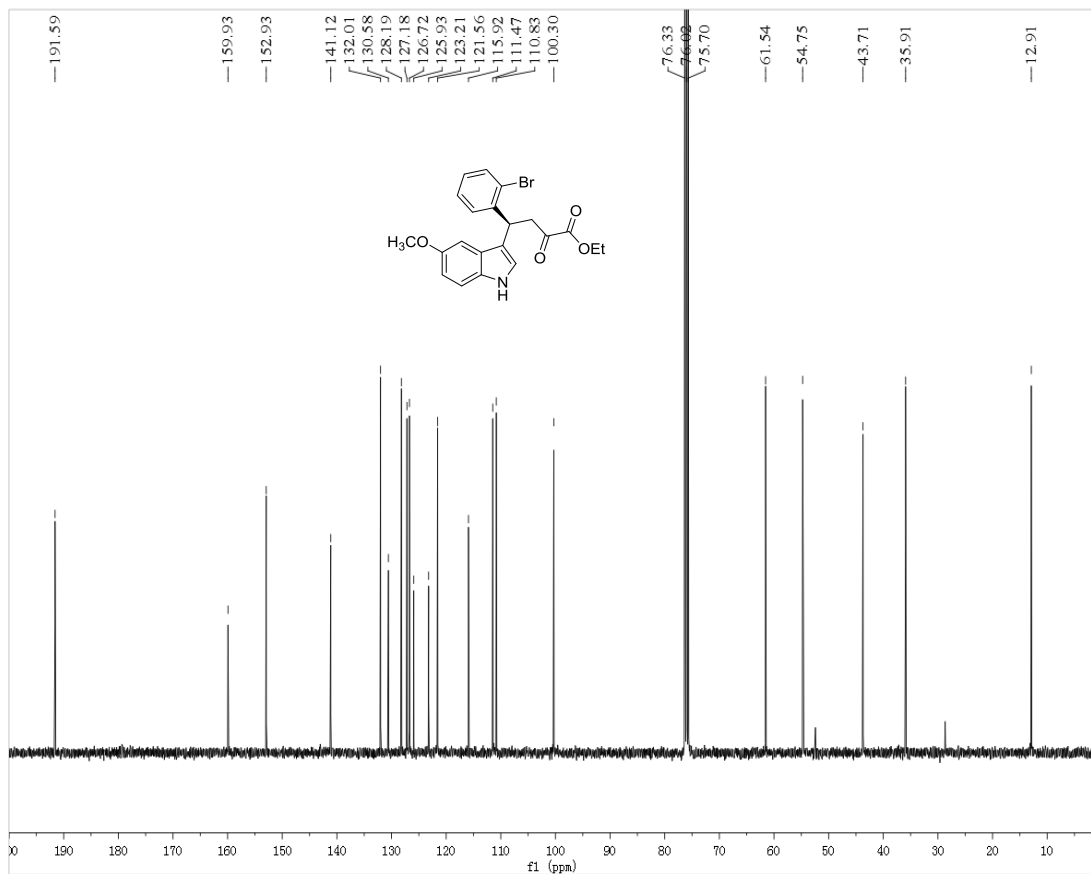

### HPLC of 6p

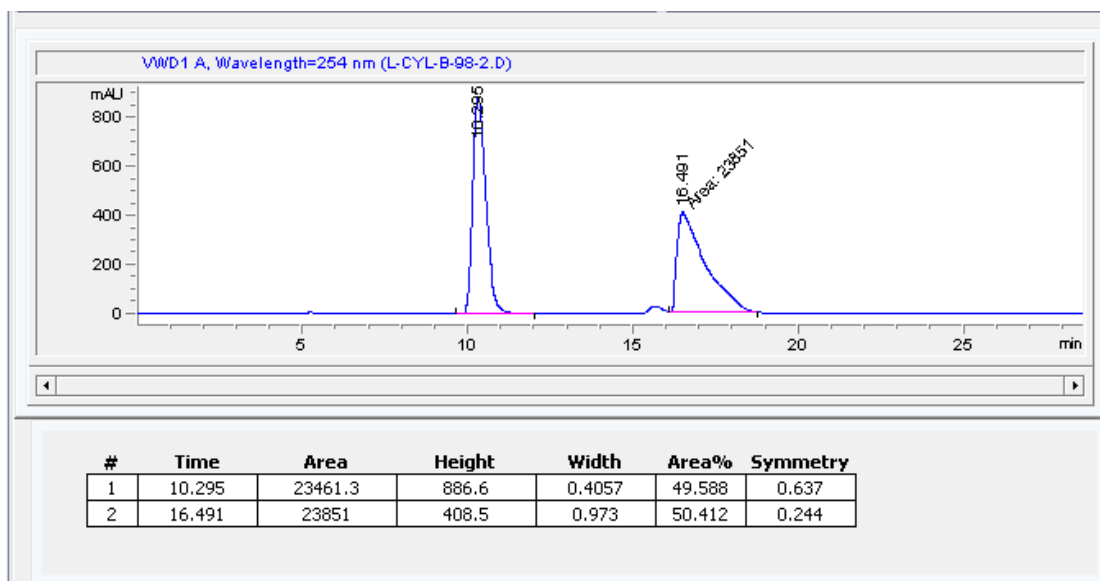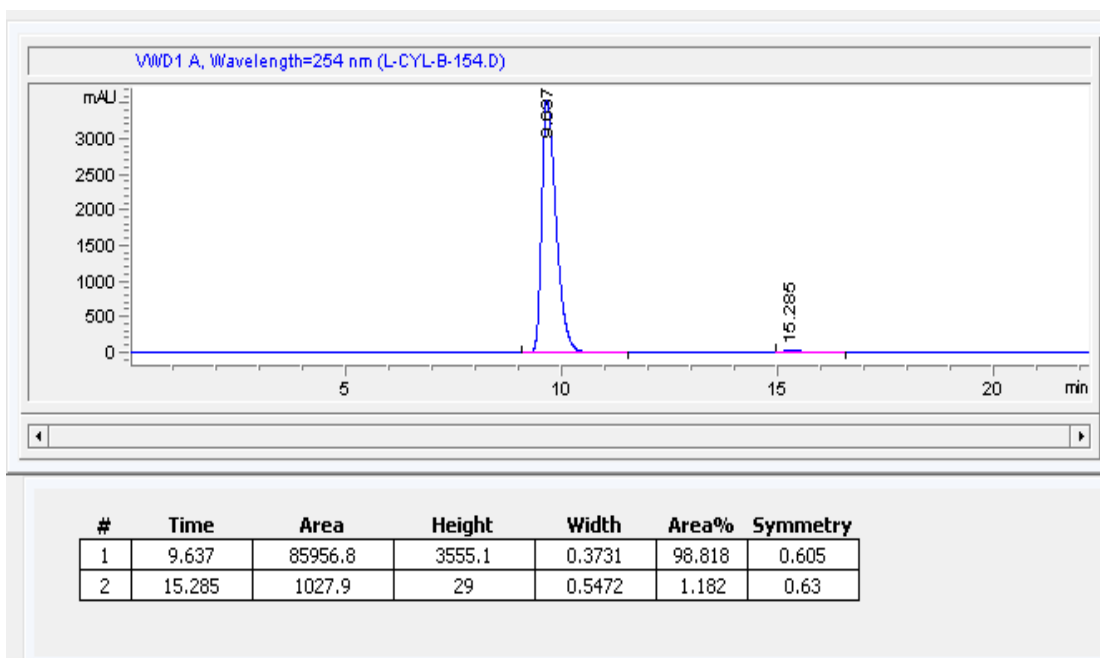

# $^1\text{H}$ and $^{13}\text{C}$ NMR of 6q

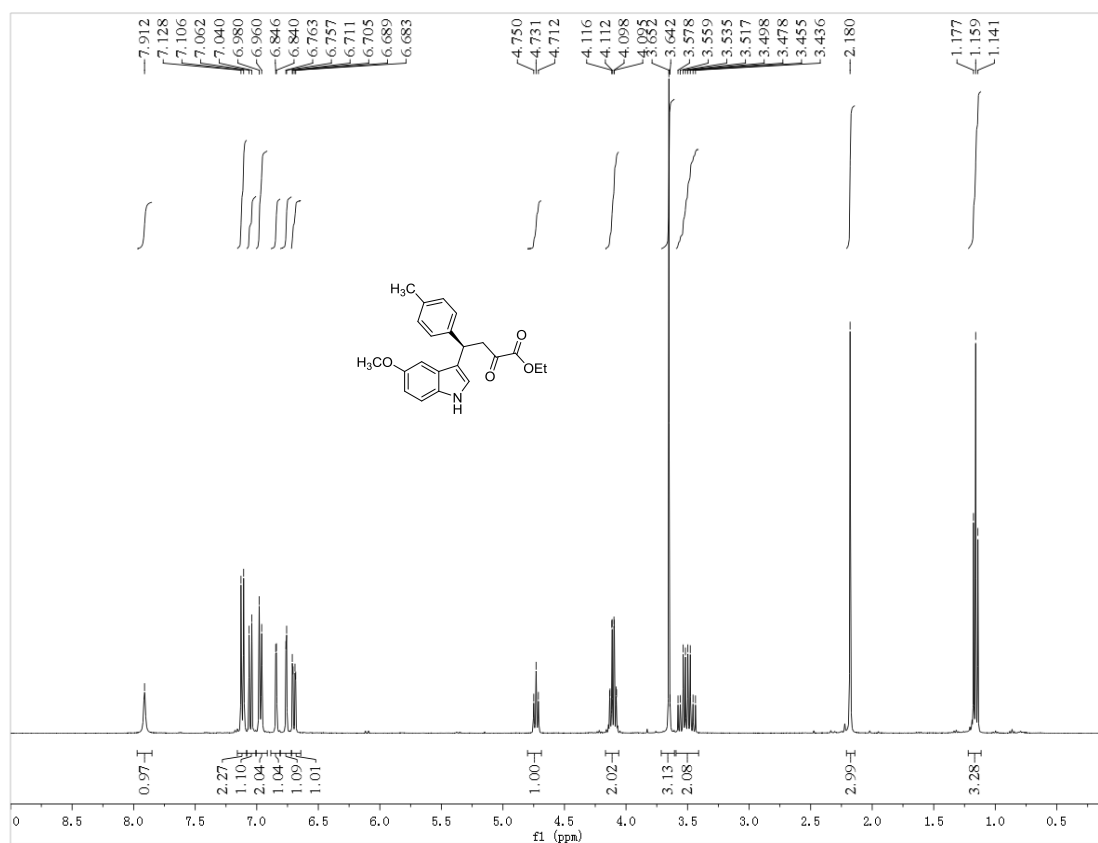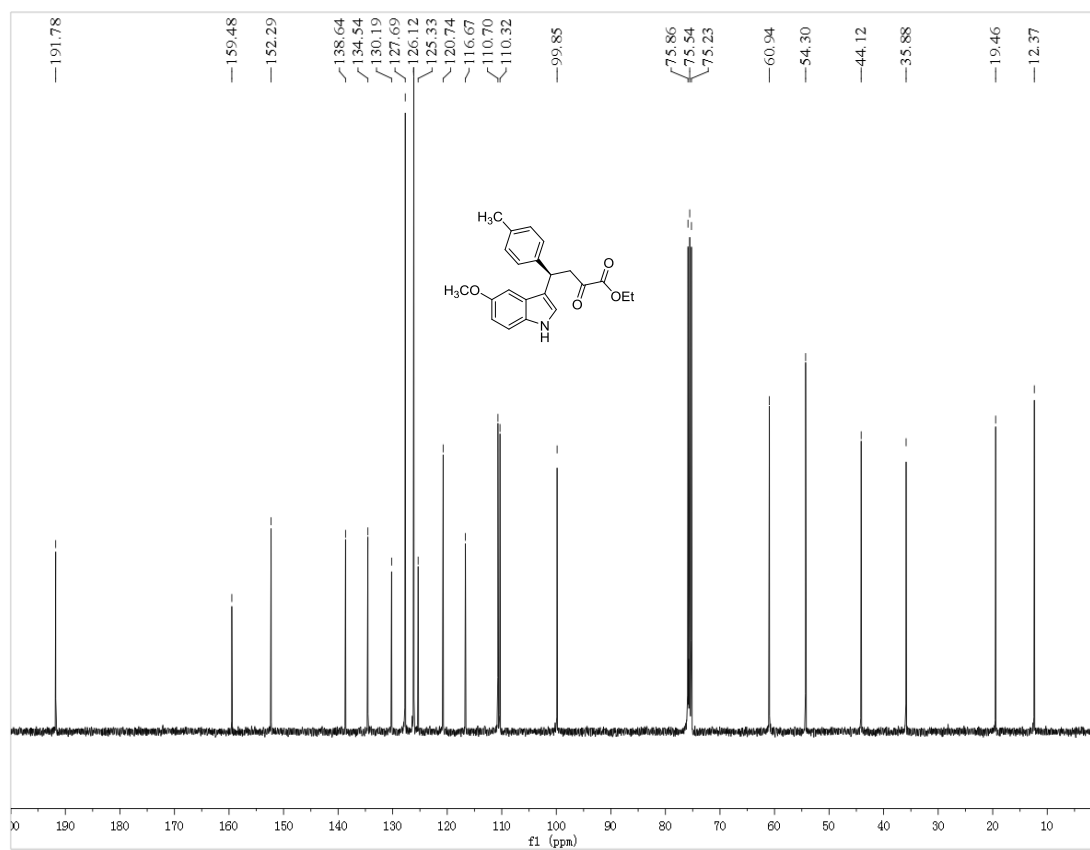

## HPLC of 6q

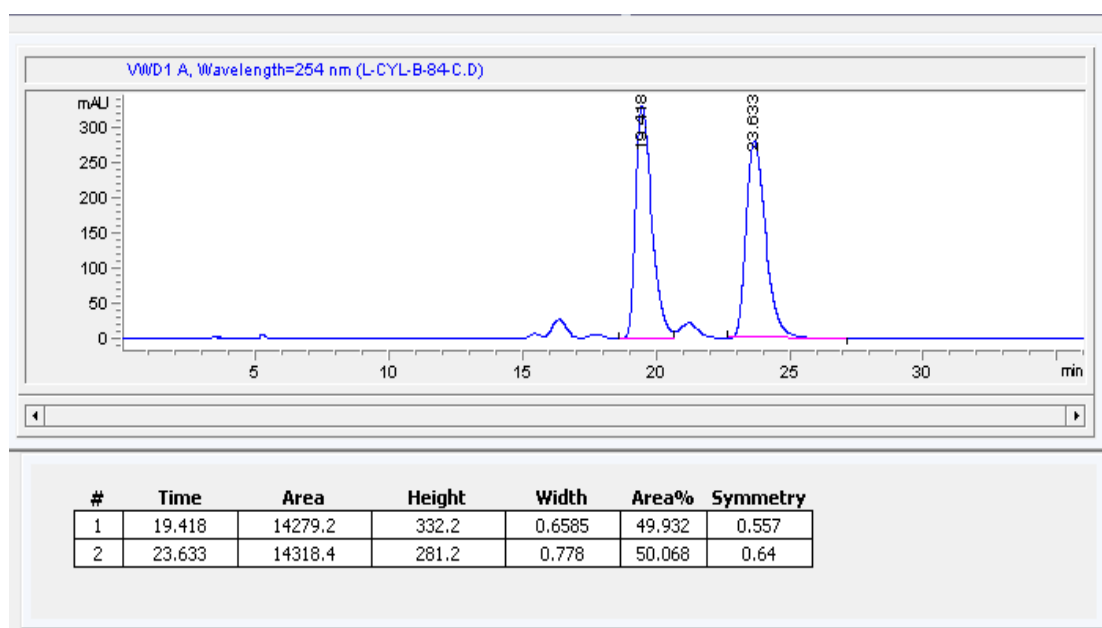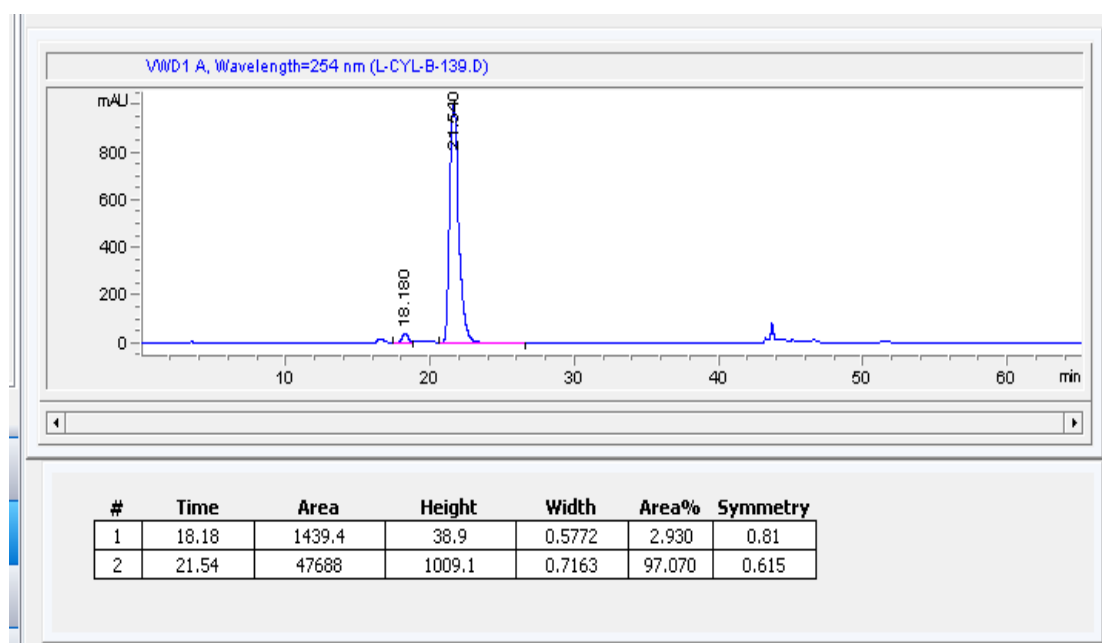

# $^1\text{H}$ and $^{13}\text{C}$ NMR of 6r

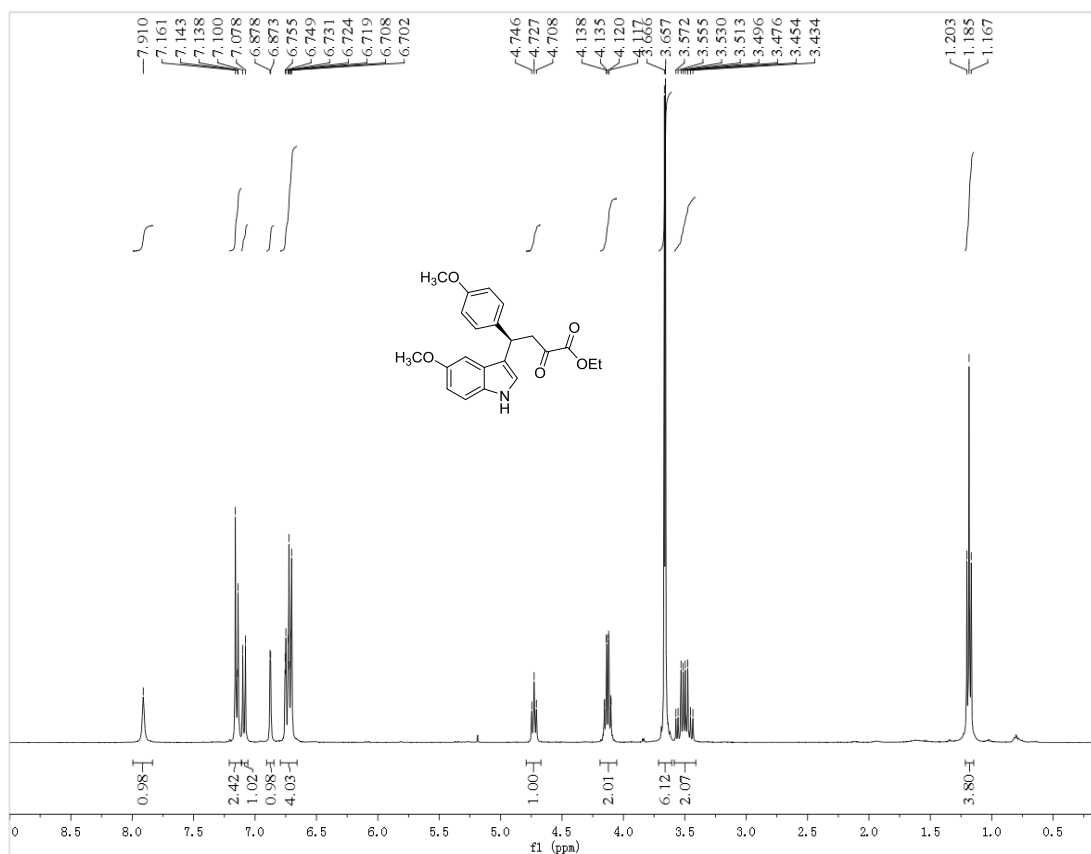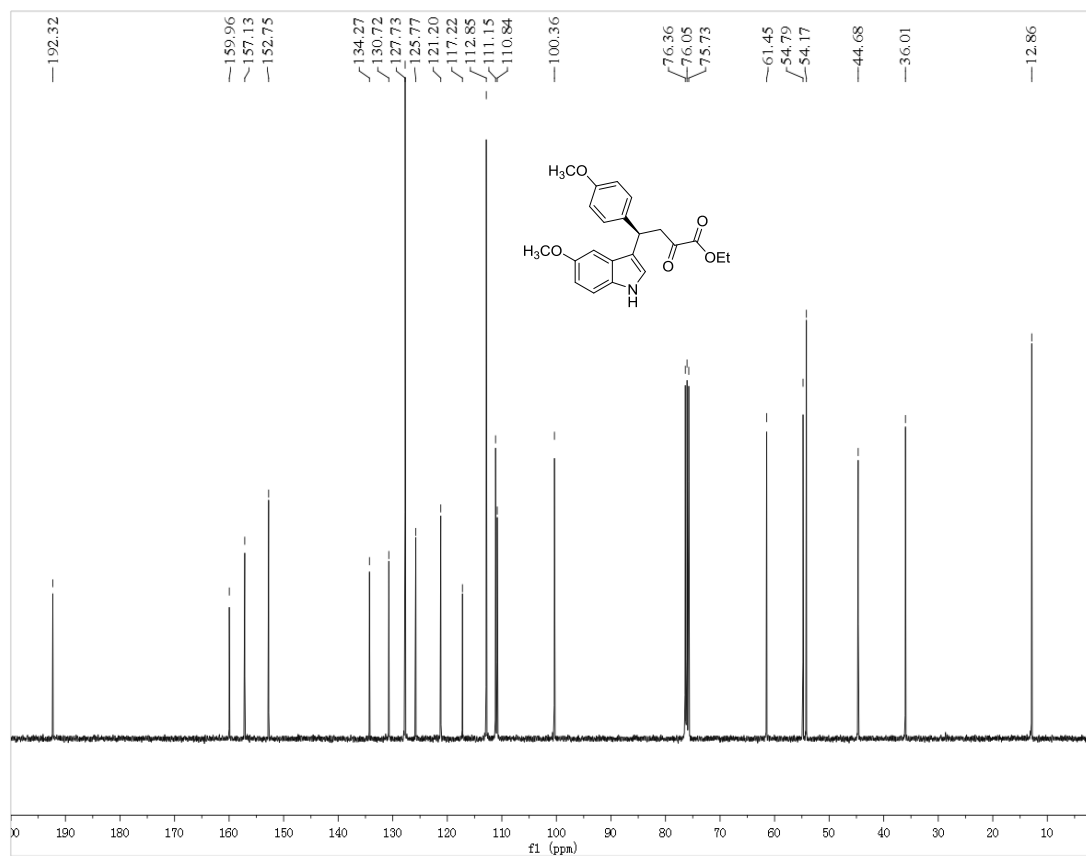

## HPLC of 6r

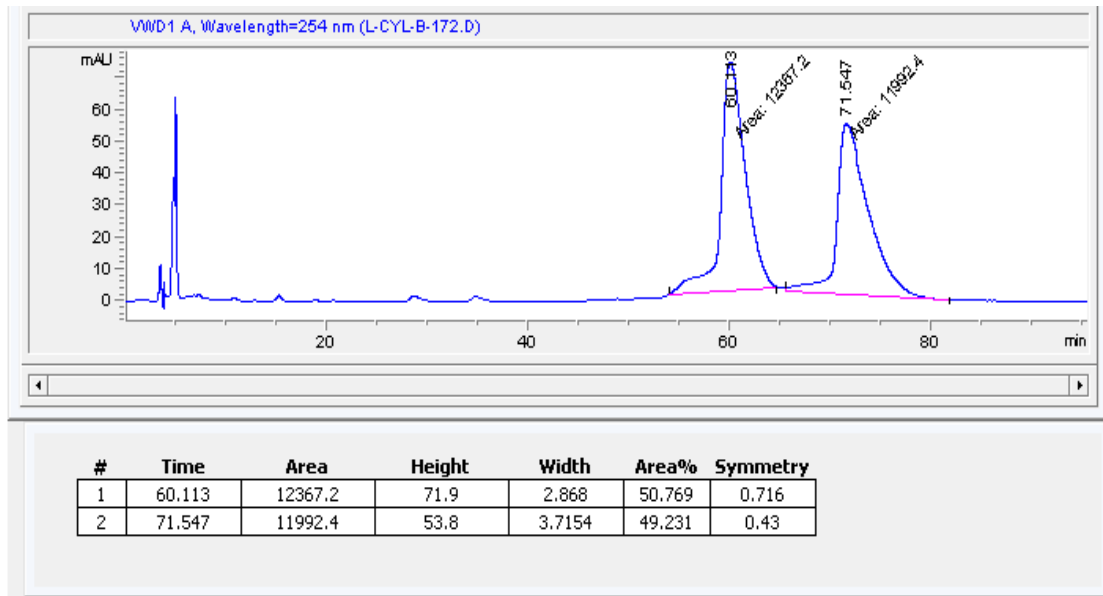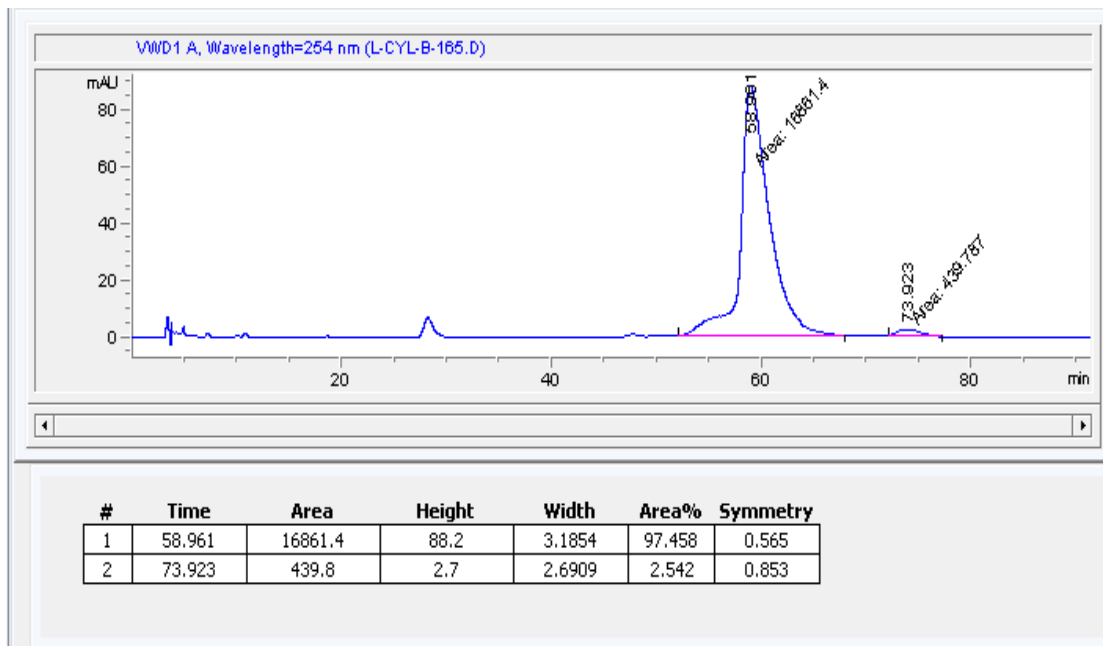



# $^1\text{H}$ and $^{13}\text{C}$ NMR of 6s

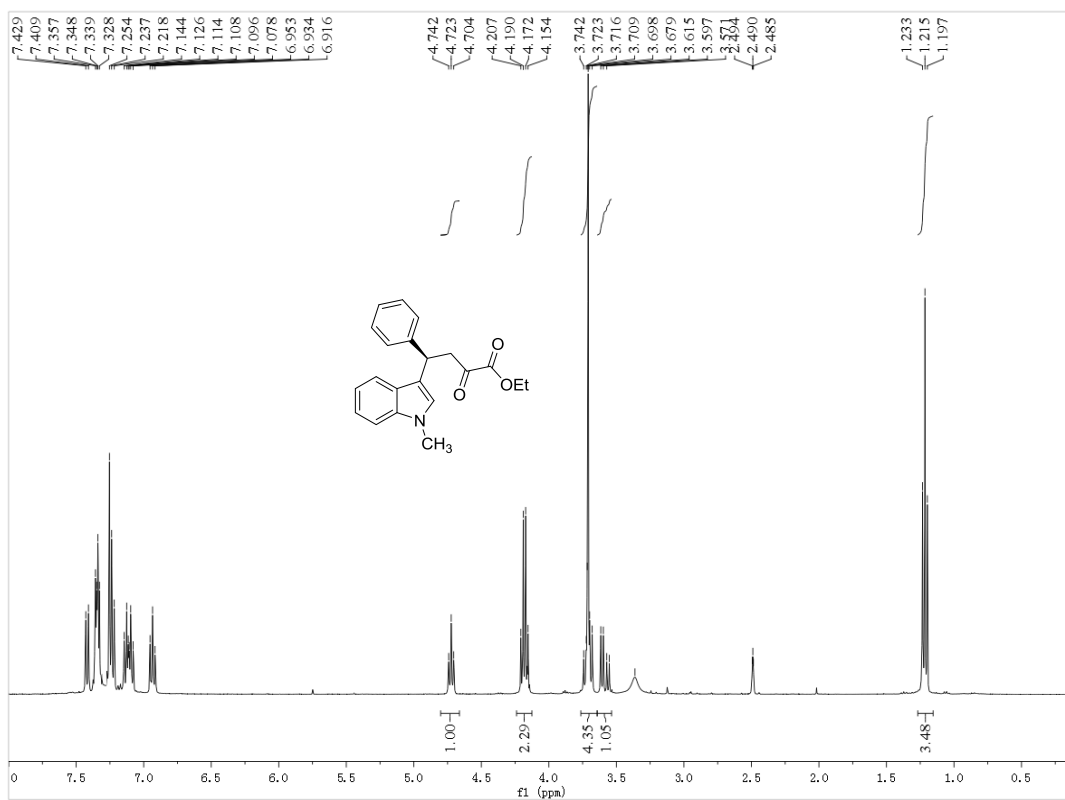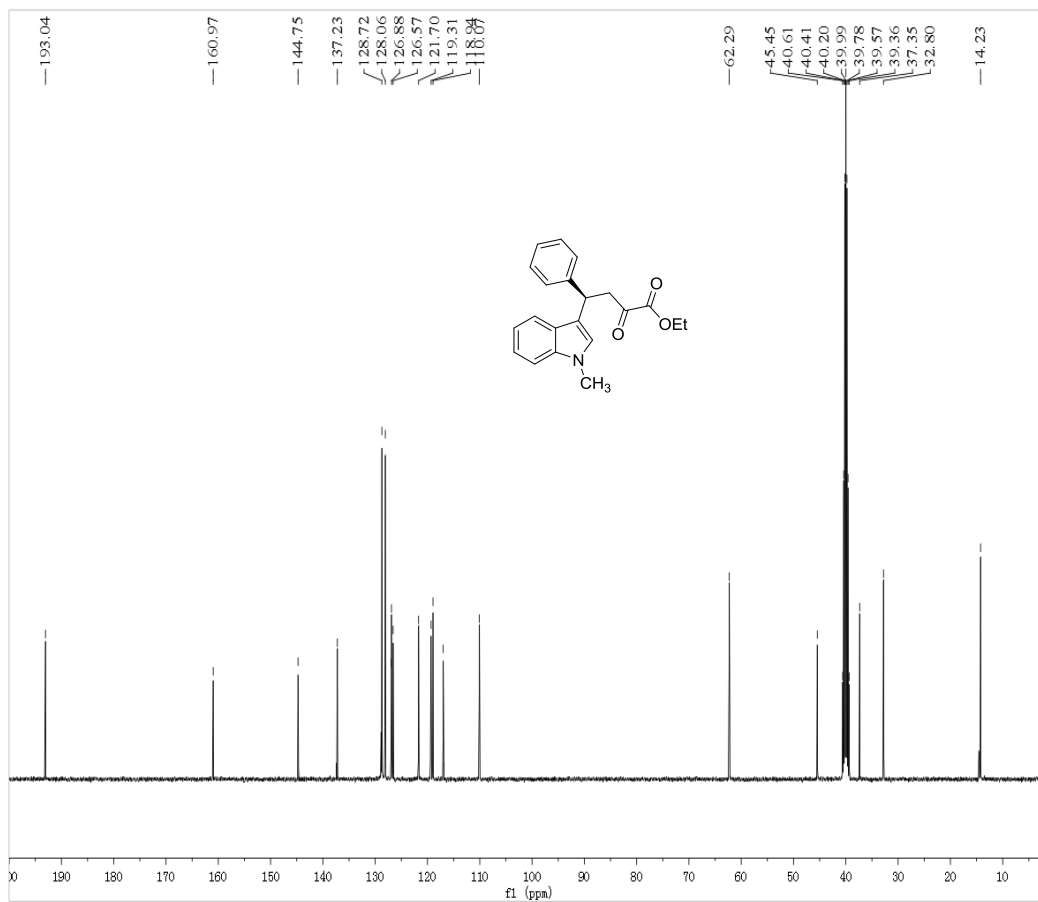

### HPLC of 6s

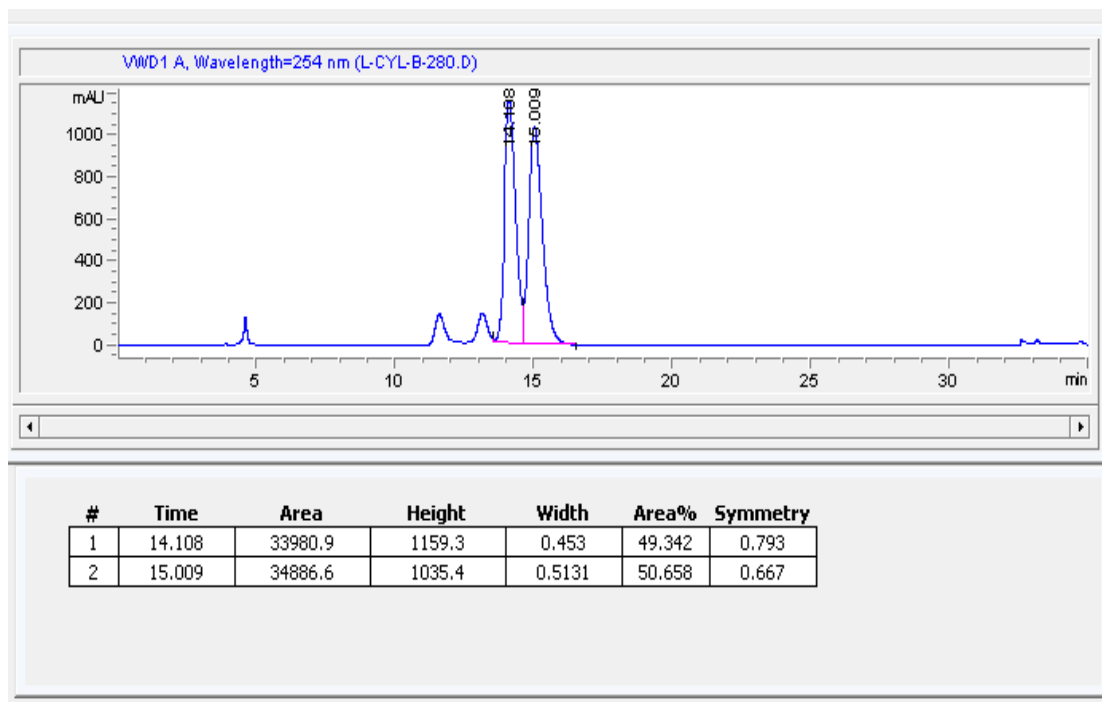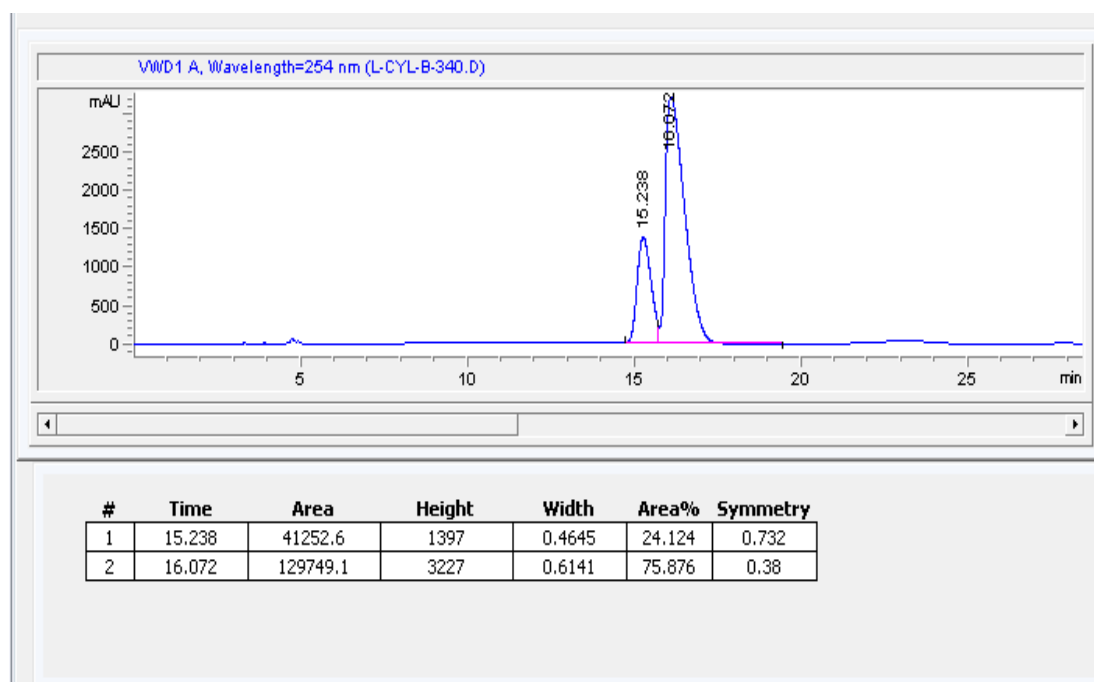

Supplement: d4nj00088a1.pdf [file d4nj00088a1.pdf]
